# Supplementary material
Source: publisher figshare collection journal article supplement (https://gsapubs.figshare.com/articles/dataset/_/12530117)
Supplement: Supplementary file 1 [file 1]

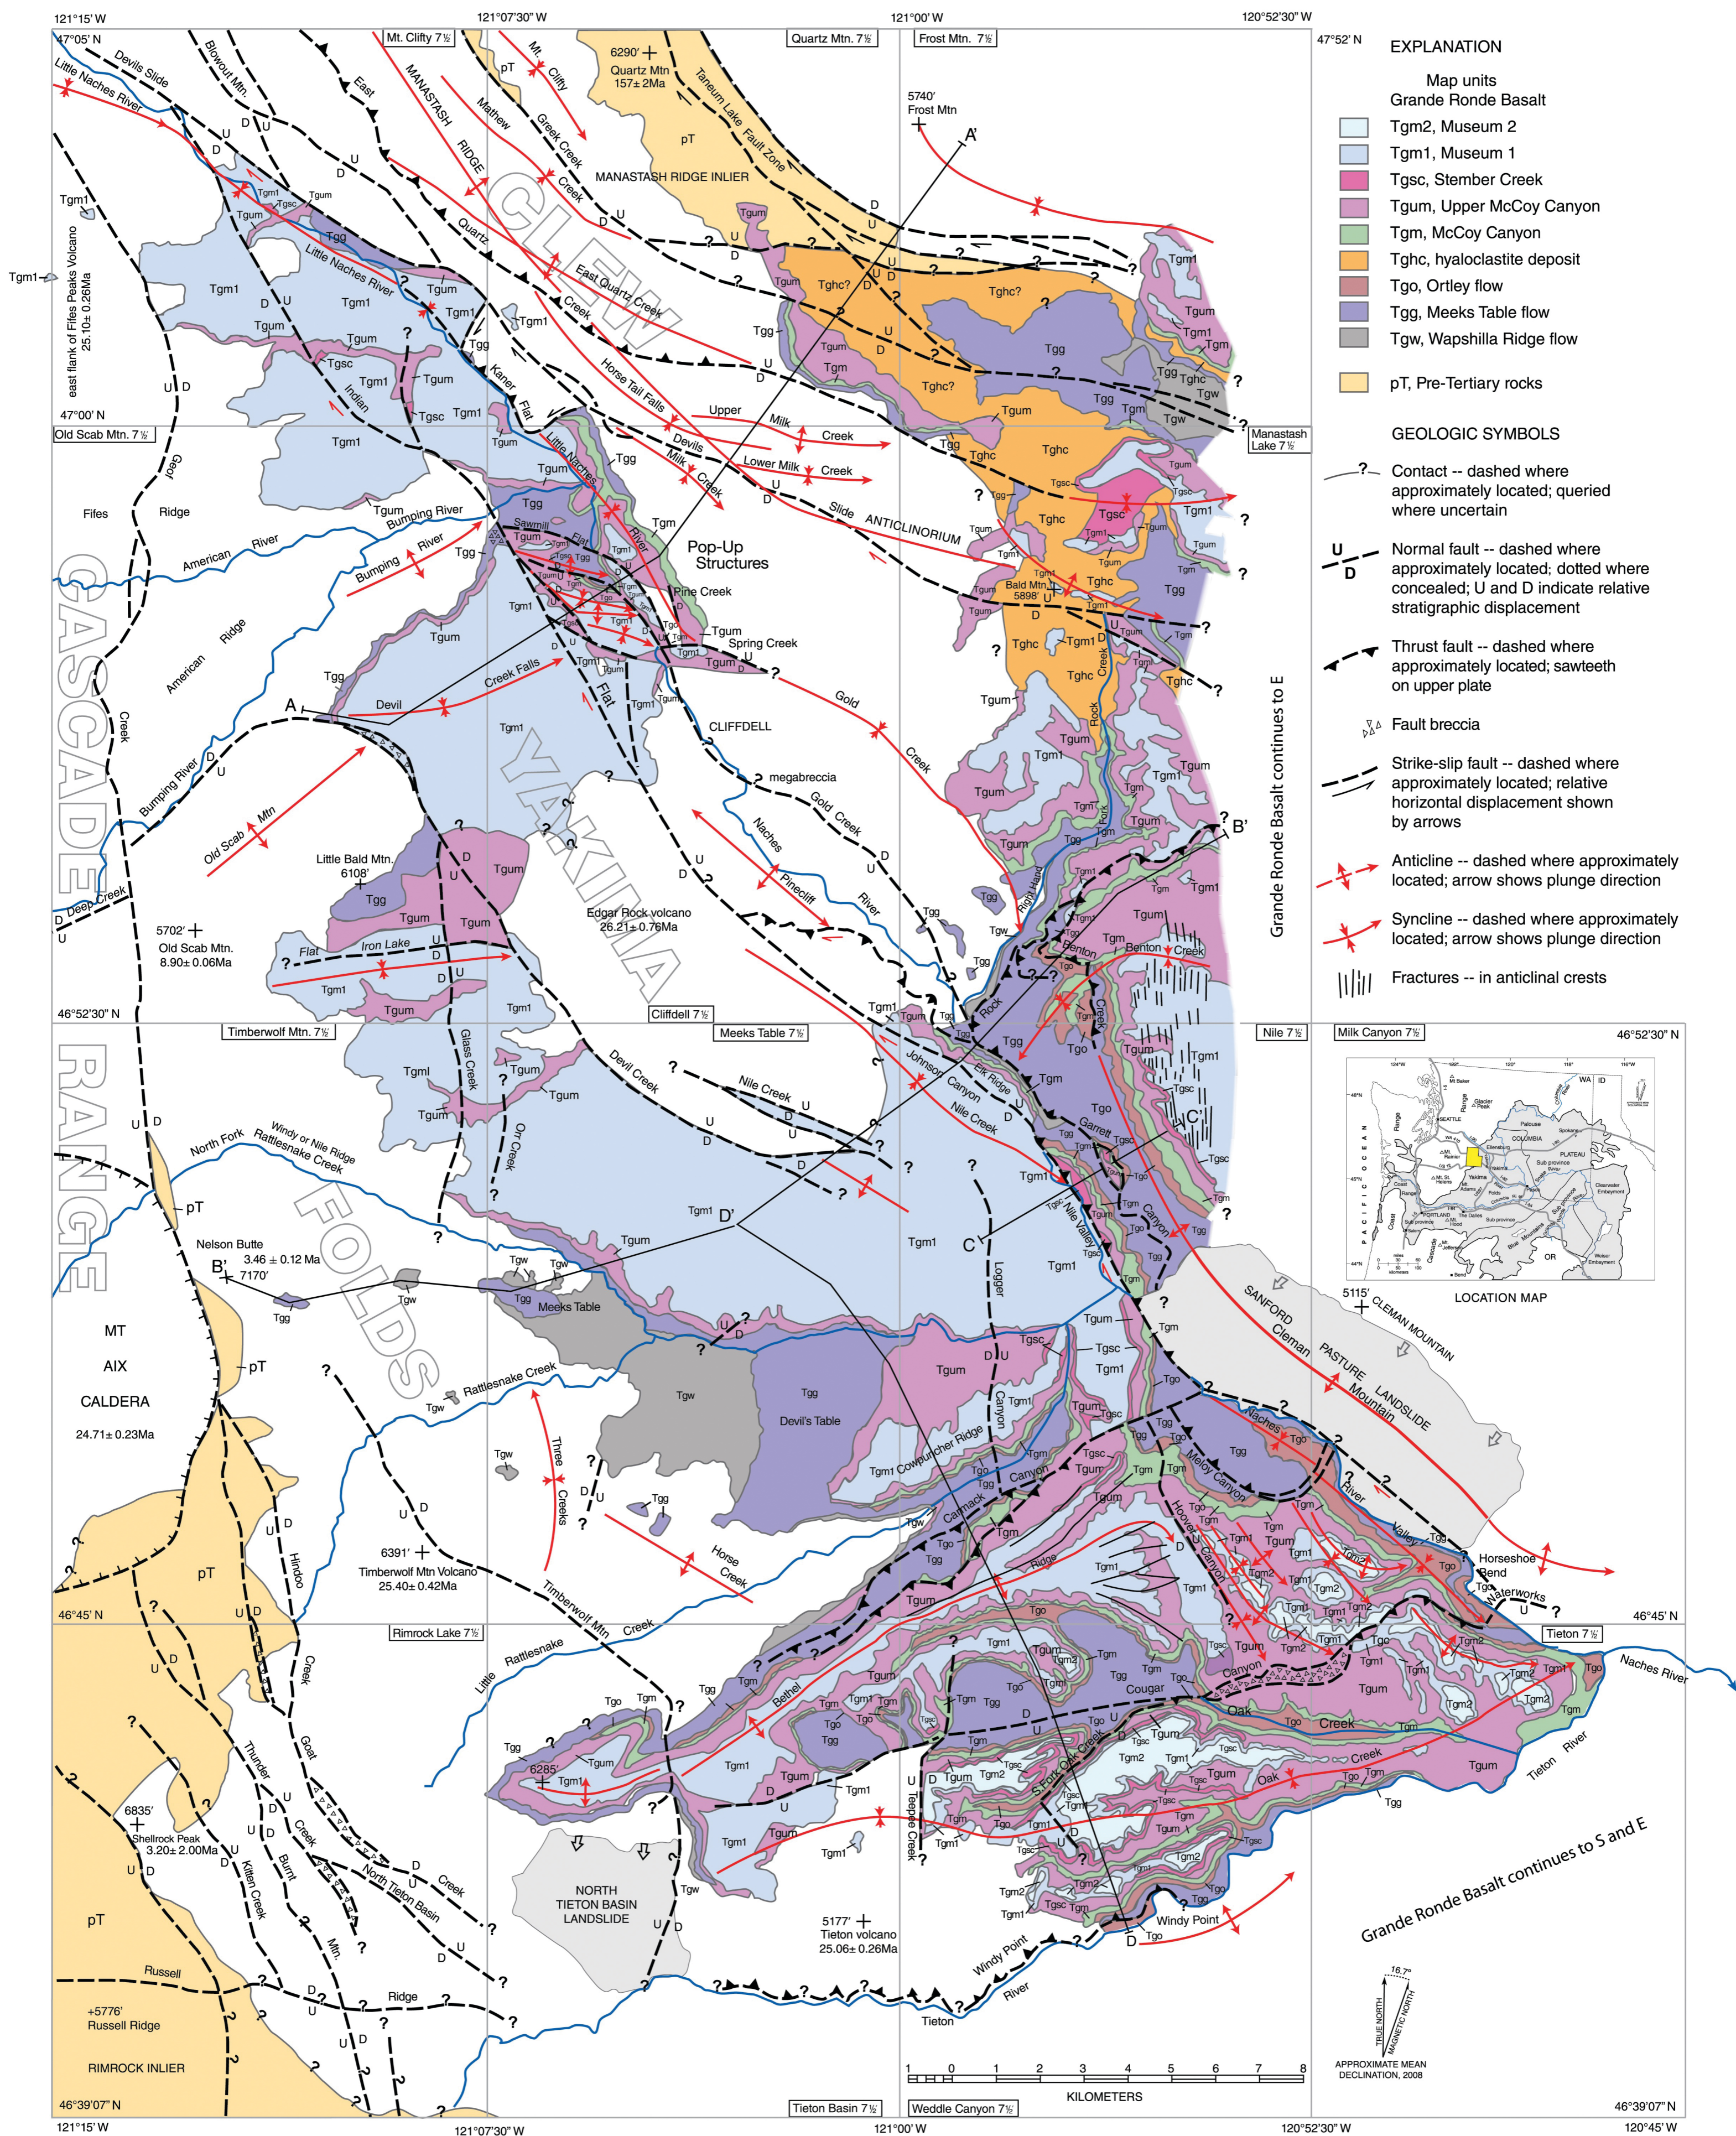

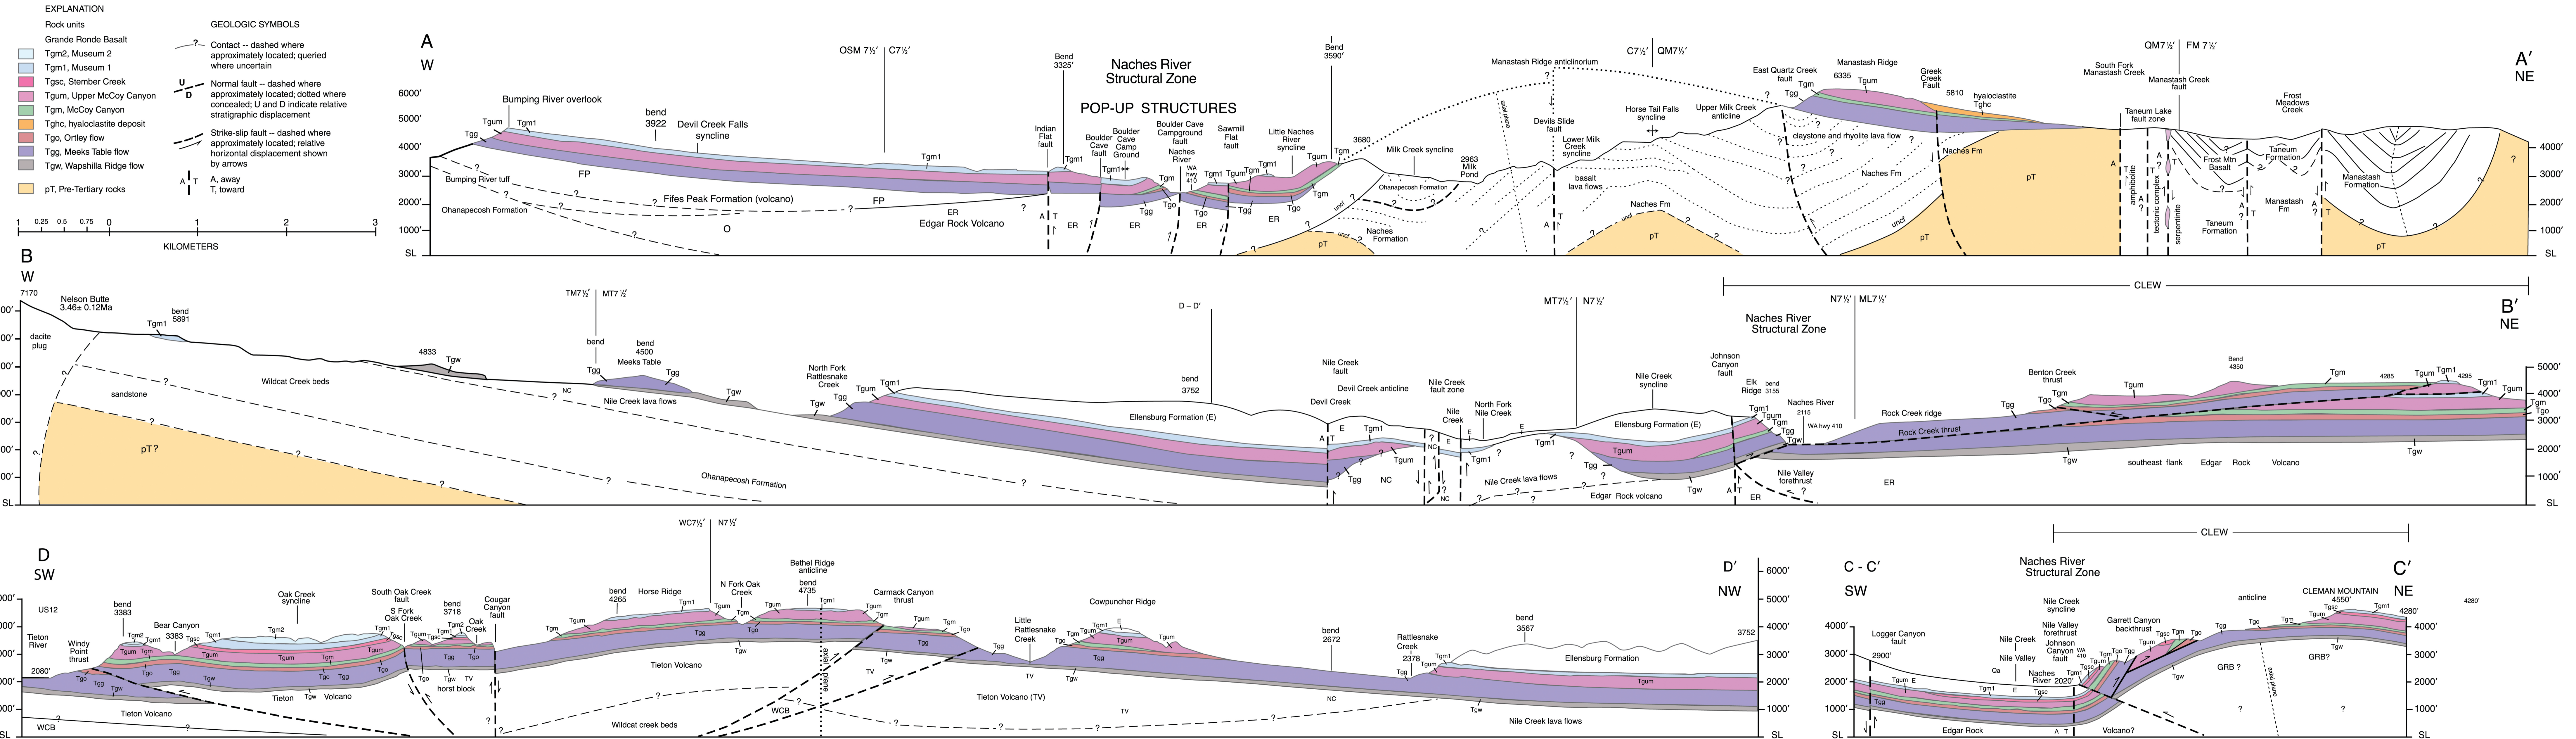

Paul E. Hammond (497-15)

Table DR1. ANALYSES OF GRANDE RONDE BASALT LAVA FLOWS IN UPPER NACHES RIVER BASIN, YAKIMA AND KITTITAS COUNTIES, WASHINGTON

|                                         | MUSEUM-2     | M2            | M2           | M2           | M2           | M2           | M2           | M2           | M2           | M2           | M2           | M2           |
|-----------------------------------------|--------------|--------------|--------------|--------------|--------------|--------------|--------------|--------------|---------------|--------------|--------------|--------------|--------------|--------------|--------------|--------------|--------------|--------------|--------------|
| SN                                      | 93301        | 93303        | 94115        | 96192        | 02017        | 02095        | 03074        | 03075        | 04105         | 04106        | 04202        | 05028        | 05031        | 05034        | 05045        | 05051        | 05096        | 05097        | 05098        |
| WSU run                                 | 0596         | 0695         | 0495         | 0897         | 0402         | 0402         | 0204         | 0204         | 0405(4)       | 0404(2)      | 0504(2)      | 0405(2)      | 0305(1)      | 0305(1)      | 0305(1)      | 0405(2)      | 0305(2)      | 0305(2)      | 0405(3)      |
| 7.5' Quad                               | Cliffdell    | Cliffdell    | Weeks Table  | Cliffdell    | Cliffdell    | Weeks Table  | Cliffdell    | Cliffdell    | lanastash Lak | anastash Lak | anastash Lak | Veddle Canyo |
| UTM N*                                  | 5206645      | 5206620      | 5186790      | 5204240      | 5204860      | 5192920      | 5204240      | 5204240      | 5203240       | 5203380      | 5193660      | 5178630      | 5178260      | 5178210      | 5177040      | 5173340      | 5175840      | 5176040      | 5176040      |
| UTM E*                                  | 643700       | 644230       | 643040       | 642710       | 643890       | 652110       | 642720       | 642720       | 656430        | 655890       | 653230       | 654220       | 656750       | 656920       | 658540       | 656630       | 654360       | 654580       | 654580       |
| Unnormalized Major Elements (Weight %): |              |              |              |              |              |              |              |              |               |              |              |              |              |              |              |              |              |              |              |
| SiO2                                    | 53.99        | 53.78        | 54.96        | 53.28        | 54.41        | 54.39        | 54.53        | 54.61        | 53.23         | 53.86        | 53.63        | 53.49        | 53.21        | 53.53        | 53.70        | 52.86        | 53.44        | 53.66        | 53.68        |
| Al2O3                                   | 13.73        | 13.70        | 14.01        | 13.84        | 13.98        | 14.16        | 1.833        | 14.33        | 14.40         | 14.60        | 1.796        | 14.22        | 13.99        | 14.14        | 14.02        | 13.95        | 14.06        | 14.15        | 14.59        |
| TiO2                                    | 1.812        | 1.786        | 1.816        | 1.837        | 1.787        | 1.816        | 1.837        | 1.785        | 1.814         | 1.824        | 1.824        | 1.784        | 1.824        | 1.807        | 1.817        | 1.795        | 1.841        | 1.751        | 1.751        |
| FeO                                     | 11.45        | 11.25        | 11.14        | 11.32        | 11.35        | 10.67        | 11.73        | 11.56        | 10.22         | 10.76        | 10.81        | 10.92        | 10.73        | 11.20        | 11.41        | 10.71        | 10.80        | 10.42        | 10.09        |
| MnO                                     | 0.189        | 0.185        | 0.179        | 0.187        | 0.189        | 0.203        | 0.195        | 0.193        | 0.198         | 0.203        | 0.197        | 0.190        | 0.198        | 0.201        | 0.197        | 0.200        | 0.198        | 0.203        | 0.184        |
| CaO                                     | 7.49         | 7.73         | 7.71         | 7.61         | 7.92         | 8.94         | 4.32         | 7.99         | 9.10          | 9.47         | 4.72         | 9.14         | 9.11         | 9.00         | 8.78         | 8.57         | 8.99         | 8.93         | 9.27         |
| MgO                                     | 4.34         | 4.06         | 4.28         | 4.37         | 4.29         | 4.47         | 7.85         | 4.09         | 4.62          | 4.36         | 8.97         | 4.13         | 4.18         | 4.97         | 4.35         | 4.77         | 5.03         | 4.21         | 5.13         |
| K2O                                     | 1.57         | 1.45         | 1.42         | 1.44         | 1.42         | 1.24         | 3.11         | 1.44         | 1.14          | 1.14         | 2.84         | 1.16         | 1.20         | 1.18         | 1.19         | 1.30         | 1.25         | 1.22         | 1.14         |
| Na2O                                    | 3.48         | 3.22         | 3.35         | 3.12         | 3.04         | 2.76         | 1.56         | 3.14         | 2.84          | 2.81         | 1.28         | 2.76         | 2.77         | 2.78         | 2.78         | 2.83         | 2.82         | 2.82         | 2.90         |
| P2O5                                    | <u>0.308</u> | <u>0.293</u> | <u>0.295</u> | <u>0.302</u> | <u>0.289</u> | <u>0.312</u> | <u>0.303</u> | <u>0.304</u> | <u>0.269</u>  | <u>0.278</u> | <u>0.300</u> | <u>0.270</u> | <u>0.330</u> | <u>0.276</u> | <u>0.322</u> | <u>0.327</u> | <u>0.272</u> | <u>0.326</u> | <u>0.263</u> |
| analysis total                          | 98.36        | 97.45        | 99.16        | 97.26        | 98.68        | 98.96        | 99.56        | 99.49        | 97.79         | 99.31        | 98.78        | 98.06        | 97.54        | 99.11        | 98.56        | 97.34        | 98.65        | 97.79        | 99.00        |
| Normalized Results (Weight %):          |              |              |              |              |              |              |              |              |               |              |              |              |              |              |              |              |              |              |              |
| SiO2                                    | 54.89        | 55.19        | 55.43        | 54.78        | 55.14        | 54.96        | 54.77        | 54.89        | 54.43         | 54.24        | 54.29        | 54.55        | 54.55        | 54.01        | 54.48        | 54.31        | 54.18        | 54.88        | 54.22        |
| Al2O3                                   | 13.96        | 14.06        | 14.13        | 14.23        | 14.17        | 14.31        | 14.19        | 14.40        | 14.72         | 14.70        | 14.41        | 14.50        | 14.35        | 14.26        | 14.22        | 14.33        | 14.26        | 14.47        | 14.74        |
| TiO2                                    | 1.842        | 1.833        | 1.831        | 1.837        | 1.811        | 1.835        | 1.841        | 1.847        | 1.825         | 1.826        | 1.818        | 1.819        | 1.870        | 1.842        | 1.833        | 1.867        | 1.819        | 1.883        | 1.769        |
| FeO*                                    | 11.64        | 11.54        | 11.23        | 11.64        | 11.50        | 10.78        | 11.78        | 11.62        | 10.45         | 10.83        | 10.95        | 11.13        | 11.00        | 11.30        | 11.58        | 11.00        | 10.95        | 10.66        | 10.19        |
| MnO                                     | 0.192        | 0.190        | 0.181        | 0.192        | 0.192        | 0.205        | 0.195        | 0.194        | 0.202         | 0.205        | 0.199        | 0.194        | 0.203        | 0.203        | 0.200        | 0.206        | 0.200        | 0.208        | 0.186        |
| CaO                                     | 7.61         | 7.93         | 7.78         | 7.82         | 8.03         | 9.03         | 7.89         | 8.04         | 9.30          | 9.54         | 9.08         | 9.32         | 9.34         | 9.08         | 8.91         | 8.81         | 9.11         | 9.14         | 9.36         |
| MgO                                     | 4.41         | 4.17         | 4.32         | 4.49         | 4.35         | 4.52         | 4.34         | 4.11         | 4.72          | 4.39         | 4.78         | 4.21         | 4.28         | 5.02         | 4.41         | 4.90         | 5.10         | 4.30         | 5.18         |
| K2O                                     | 1.60         | 1.49         | 1.43         | 1.48         | 1.44         | 1.25         | 1.56         | 1.44         | 1.17          | 1.15         | 1.29         | 1.18         | 1.23         | 1.19         | 1.20         | 1.34         | 1.26         | 1.25         | 1.15         |
| Na2O                                    | 3.54         | 3.30         | 3.38         | 3.21         | 3.08         | 2.79         | 3.13         | 3.16         | 2.90          | 2.83         | 2.88         | 2.81         | 2.84         | 2.80         | 2.82         | 2.90         | 2.86         | 2.89         | 2.93         |
| P2O5                                    | <u>0.313</u> | <u>0.301</u> | <u>0.297</u> | <u>0.311</u> | <u>0.293</u> | <u>0.315</u> | <u>0.304</u> | <u>0.306</u> | <u>0.275</u>  | <u>0.280</u> | <u>0.304</u> | <u>0.275</u> | <u>0.338</u> | <u>0.278</u> | <u>0.327</u> | <u>0.336</u> | <u>0.276</u> | <u>0.333</u> | <u>0.266</u> |
|                                         | 100.00       | 100.00       | 100.00       | 100.00       | 100.00       | 100.00       | 100.00       | 100.00       | 100.00        | 100.00       | 100.00       | 100.00       | 100.00       | 100.00       | 100.00       | 100.00       | 100.00       | 100.00       | 100.00       |
| Unnormalized Trace Elements (ppm):      |              |              |              |              |              |              |              |              |               |              |              |              |              |              |              |              |              |              |              |
| Ni                                      | 2            | 6            | 10           | 6            | 16           | 11           | 13           | 16           | 19            | 20           | 19           | 23           | 21           | 25           | 23           | 18           | 24           | 22           | 20           |
| Cr                                      | 1            | 17           | 25           | 20           | 29           | 58           | 12           | 12           | 51            | 49           | 48           | 51           | 45           | 50           | 46           | 43           | 49           | 45           | 56           |
| Sc                                      | 38           | 34           | 32           | 32           | 37           | 34           | 32           | 32           | 39            | 37           | 37           | 38           | 38           | 39           | 38           | 38           | 38           | 39           | 40           |
| V                                       | 329          | 327          | 330          | 327          | 320          | 312          | 339          | 338          | 324           | 332          | 319          | 331          | 313          | 329          | 304          | 306          | 329          | 312          | 328          |
| Ba                                      | 624          | 557          | 541          | 615          | 571          | 861          | 589          | 600          | 488           | 485          | 527          | 486          | 723          | 487          | 535          | 506          | 479          | 635          | 435          |
| Rb                                      | 41           | 38           | 38           | 39           | 39           | 28           | 41           | 40           | 25            | 29           | 26           | 27           | 28           | 26           | 29           | 29           | 28           | 30           | 25           |
| Sr                                      | 312          | 320          | 316          | 318          | 327          | 335          | 322          | 332          | 312           | 324          | 302          | 324          | 325          | 314          | 319          | 306          | 311          | 327          | 316          |
| Zr                                      | 155          | 155          | 154          | 154          | 153          | 154          | 161          | 161          | 150           | 151          | 145          | 155          | 159          | 157          | 160          | 158          | 155          | 162          | 149          |
| Y                                       | 32           | 33           | 33           | 31           | 32           | 39           | 32           | 33           | 33.6          | 32           | 34           | 34           | 34           | 33           | 35           | 36           | 33           | 35           | 33           |
| Nb                                      | 12.5         | 11.8         | 11.3         | 12.2         | 11.9         | 11.4         | 10.7         | 10.7         | 10.6          | 11.4         | 11.8         | 10.7         | 11.4         | 11.0         | 11.2         | 11.5         | 10.6         | 10.9         | 11.0         |
| Ga                                      | 21           | 24           | 21           | 21           | 20           | 20           | 20           | 20           | 20            | 20           | 21           | 21           | 22           | 18           | 21           | 22           | 19           | 21           | 21           |
| Cu                                      | 25           | 19           | 22           | 17           | 30           | 36           | 29           | 27           | 37            | 34           | 32           | 38           | 33           | 39           | 34           | 30           | 38           | 33           | 35           |
| Zn                                      | 108          | 108          | 110          | 108          | 108          | 118          | 115          | 113          | 110           | 112          | 108          | 109          | 115          | 114          | 112          | 114          | 110          | 117          | 112          |
| Pb                                      | 6            | 6            | 5            | 5            | 6            | 8            | 8            | 9            | 6             | 3            | 4            | 4            | 3            | 5            | 4            | 8            | 3            | 3            | 5            |
| La                                      | 1            | 13           | 17           | 6            | 22           | 6            | 19           | 23           | 17            | 19           | 21           | 19           | 22           | 20           | 19           | 23           | 19           | 19           | 18           |
| Ce                                      | 0            | 56           | 45           | 33           | 51           | 38           | 50           | 50           | 40            | 41           | 44           | 41           | 45           | 40           | 46           | 46           | 41           | 44           | 39           |
| Th                                      | 4            | 3            | 2            | 6            | 5            | 4            | 5            | 4            | 2             | 4            | 3            | 1            | 2            | 1            | 1            | 3            | 0            | 1            | 2            |
| Nd                                      | nd           | nd           | nd           | nd           | nd           | nd           | nd           | nd           | 23            | 23           | 21           | 24           | 28           | 24           | 25           | 26           | 24           | 24           | 24           |

\*to nearest 5 m  
"†" denotes values >120% of highest standard.  
nd, not determined

Page 2

Paul E. Hamr  
Table DR1.

| SN                          | 93021        | 93041        | 93297        | 93299        | 93302        | 93304        | 93305        | 93306        | 93308        | 94084        | 94088        | 94161        | 94368        | 94388        | 94398          | 94404        | 94412        | 95099        | 95100        |
|-----------------------------|--------------|--------------|--------------|--------------|--------------|--------------|--------------|--------------|--------------|--------------|--------------|--------------|--------------|--------------|----------------|--------------|--------------|--------------|--------------|
| WSU run                     | 0695         | 0695         | 0695         | 0695         | 0596         | 0596         | 0596         | 0695         | 0695         | 0495         | 0495         | 0495         | 1194(2)      | 1194         | 1194           | 1194         | 1194         | 0596         | 0596         |
| 7.5' Quad                   | Mt. Clifty   | Mt. Clifty   | Mt. Clifty   | Quartz Mtn   | Quartz Mtn   | Mt. Clifty   | Mt. Clifty   | Mt. Clifty   | Quartz Mtn   | Old Scab Mtn | Old Scab Mtn | Old Scab Mtn | Old Scab Mtn | Cliffdell    | Timberwolf Mtn | Weeks Table  | Weeks Table  | Cliffdell    | Cliffdell    |
| UTM N*                      | 5209820      | 5208700      | 5207370      | 5206720      | 5209270      | 5209360      | 5209500      | 5209740      | 5209420      | 5199370      | 5193670      | 5204910      | 5199900      | 5193500      | 5191750        | 5192100      | 5188450      | 5202100      | 5202100      |
| UTM E*                      | 641735       | 635800       | 642500       | 642810       | 642710       | 640980       | 640670       | 641630       | 642900       | 640240       | 637660       | 640070       | 639200       | 643850       | 642250         | 645150       | 643300       | 644290       | 644290       |
| UnnormalizedWeight %:       |              |              |              |              |              |              |              |              |              |              |              |              |              |              |                |              |              |              |              |
| SiO2                        | 53.05        | 53.28        | 53.49        | 52.76        | 53.19        | 53.27        | 53.92        | 53.07        | 52.87        | 54.41        | 53.68        | 53.69        | 55.24        | 55.15        | 54.48          | 54.74        | 55.06        | 54.82        | 52.84        |
| Al2O3                       | 13.88        | 14.07        | 13.95        | 13.71        | 13.95        | 13.96        | 14.21        | 13.76        | 13.79        | 13.99        | 14.36        | 14.02        | 14.46        | 14.33        | 13.93          | 14.43        | 14.37        | 14.24        | 13.85        |
| TiO2                        | 1.735        | 1.744        | 1.748        | 1.723        | 1.718        | 1.783        | 1.717        | 1.780        | 1.734        | 1.802        | 1.728        | 1.712        | 1.826        | 1.829        | 1.788          | 1.728        | 1.833        | 1.723        | 1.760        |
| FeO                         | 10.95        | 10.99        | 11.15        | 11.11        | 10.99        | 11.20        | 11.31        | 11.28        | 11.17        | 11.26        | 10.24        | 10.92        | 10.36        | 10.42        | 11.30          | 10.87        | 10.93        | 10.95        | 10.73        |
| MnO                         | 0.195        | 0.192        | 0.196        | 0.189        | 0.193        | 0.200        | 0.196        | 0.193        | 0.189        | 0.195        | 0.184        | 0.19         | 0.200        | 0.204        | 0.201          | 0.208        | 0.195        | 0.173        | 0.204        |
| CaO                         | 8.50         | 8.42         | 8.42         | 8.33         | 8.42         | 8.30         | 8.54         | 8.32         | 8.38         | 8.27         | 8.53         | 8.45         | 8.37         | 8.31         | 8.23           | 8.78         | 8.38         | 8.20         | 8.21         |
| MgO                         | 4.53         | 4.57         | 4.68         | 4.64         | 4.89         | 4.53         | 5.01         | 4.30         | 4.69         | 4.31         | 4.31         | 4.77         | 4.55         | 4.55         | 4.56           | 4.64         | 4.44         | 4.84         | 4.54         |
| K2O                         | 1.10         | 1.24         | 1.23         | 1.33         | 1.10         | 1.08         | 1.08         | 1.07         | 1.08         | 1.39         | 1.35         | 1.25         | 1.42         | 1.38         | 1.45           | 1.32         | 1.44         | 1.24         | 1.28         |
| Na2O                        | 3.03         | 3.14         | 3.06         | 2.87         | 3.17         | 3.21         | 3.26         | 3.19         | 3.02         | 2.98         | 3            | 3.11         | 3.03         | 3.08         | 3.04           | 3.11         | 3.11         | 3.52         | 3.11         |
| P2O5                        | <u>0.310</u> | <u>0.322</u> | <u>0.318</u> | <u>0.312</u> | <u>0.313</u> | <u>0.344</u> | <u>0.314</u> | <u>0.336</u> | <u>0.308</u> | <u>0.366</u> | <u>0.305</u> | <u>0.309</u> | <u>0.347</u> | <u>0.368</u> | <u>0.348</u>   | <u>0.303</u> | <u>0.370</u> | <u>0.317</u> | <u>0.341</u> |
| analysis total              | 97.28        | 97.97        | 98.24        | 96.97        | 97.93        | 97.88        | 99.56        | 97.30        | 97.23        | 98.973       | 97.687       | 98.421       | 99.80        | 99.62        | 99.33          | 100.13       | 100.13       | 100.02       | 96.87        |
| Weight %:                   |              |              |              |              |              |              |              |              |              |              |              |              |              |              |                |              |              |              |              |
| SiO2                        | 54.53        | 54.39        | 54.45        | 54.41        | 54.31        | 54.43        | 54.16        | 54.54        | 54.38        | 54.97        | 54.95        | 54.55        | 55.35        | 55.36        | 54.85          | 54.67        | 54.99        | 54.81        | 54.55        |
| Al2O3                       | 14.27        | 14.36        | 14.20        | 14.14        | 14.24        | 14.26        | 14.27        | 14.14        | 14.18        | 14.14        | 14.70        | 14.24        | 14.49        | 14.38        | 14.02          | 14.41        | 14.35        | 14.24        | 14.30        |
| TiO2                        | 1.784        | 1.780        | 1.779        | 1.777        | 1.754        | 1.822        | 1.725        | 1.829        | 1.783        | 1.821        | 1.769        | 1.739        | 1.830        | 1.836        | 1.800          | 1.726        | 1.831        | 1.723        | 1.817        |
| FeO*                        | 11.26        | 11.22        | 11.35        | 11.46        | 11.22        | 11.44        | 11.36        | 11.59        | 11.49        | 11.38        | 10.48        | 11.10        | 10.38        | 10.46        | 11.38          | 10.86        | 10.92        | 10.95        | 11.08        |
| MnO                         | 0.200        | 0.196        | 0.200        | 0.195        | 0.197        | 0.204        | 0.197        | 0.198        | 0.194        | 0.197        | 0.188        | 0.193        | 0.200        | 0.205        | 0.202          | 0.208        | 0.195        | 0.173        | 0.211        |
| CaO                         | 8.74         | 8.59         | 8.57         | 8.59         | 8.60         | 8.48         | 8.58         | 8.55         | 8.62         | 8.36         | 8.73         | 8.59         | 8.39         | 8.34         | 8.29           | 8.77         | 8.37         | 8.20         | 8.48         |
| MgO                         | 4.66         | 4.66         | 4.76         | 4.78         | 4.99         | 4.63         | 5.03         | 4.42         | 4.82         | 4.35         | 4.41         | 4.85         | 4.56         | 4.57         | 4.59           | 4.63         | 4.43         | 4.84         | 4.69         |
| K2O                         | 1.13         | 1.27         | 1.25         | 1.37         | 1.12         | 1.10         | 1.08         | 1.10         | 1.11         | 1.40         | 1.38         | 1.27         | 1.42         | 1.39         | 1.46           | 1.32         | 1.44         | 1.24         | 1.32         |
| Na2O                        | 3.11         | 3.21         | 3.11         | 2.96         | 3.24         | 3.28         | 3.27         | 3.28         | 3.11         | 3.01         | 3.07         | 3.16         | 3.04         | 3.09         | 3.06           | 3.11         | 3.11         | 3.52         | 3.21         |
| P2O5                        | <u>0.319</u> | <u>0.329</u> | <u>0.324</u> | <u>0.322</u> | <u>0.320</u> | <u>0.351</u> | <u>0.315</u> | <u>0.345</u> | <u>0.317</u> | <u>0.370</u> | <u>0.312</u> | <u>0.314</u> | <u>0.348</u> | <u>0.369</u> | <u>0.350</u>   | <u>0.303</u> | <u>0.370</u> | <u>0.317</u> | <u>0.352</u> |
|                             | 100.00       | 100.00       | 100.00       | 100.00       | 100.00       | 100.00       | 100.00       | 100.00       | 100.00       | 100.00       | 100.00       | 100.00       | 100.00       | 100.00       | 100.00         | 100.00       | 100.00       | 100.00       | 100.00       |
| Unnormalizedelements (ppm): |              |              |              |              |              |              |              |              |              |              |              |              |              |              |                |              |              |              |              |
| Ni                          | 3            | 4            | 6            | 3            | 9            | 5            | 11           | 4            | 7            | 4            | 5            | 5            | 5            | 7            | 1              | 5            | 4            | 8            | 12           |
| Cr                          | 40           | 40           | 40           | 41           | 43           | 42           | 41           | 37           | 40           | 38           | 42           | 41           | 39           | 37           | 38             | 44           | 33           | 32           | 35           |
| Sc                          | 32           | 31           | 32           | 34           | 44           | 43           | 43           | 31           | 39           | 28           | 33           | 33           | 36           | 38           | 36             | 44           | 38           | 40           | 41           |
| V                           | 311          | 301          | 298          | 300          | 306          | 300          | 309          | 309          | 307          | 295          | 320          | 313          | 326          | 294          | 293            | 322          | 308          | 295          | 297          |
| Ba                          | 509          | 522          | 504          | 483          | 524          | 531          | 503          | 502          | 506          | 526          | 544          | 493          | 548          | 566          | <b>527</b>     | <b>497</b>   | 581          | 506          | 609          |
| Rb                          | 32           | 32           | 32           | 30           | 30           | 32           | 30           | 30           | 31           | 34           | 33           | 31           | 34           | 34           | 34             | 31           | 34           | 31           | 31           |
| Sr                          | 320          | 314          | 314          | 306          | 309          | 314          | 308          | 321          | 314          | 315          | 323          | 311          | 308          | 306          | 307            | 318          | 311          | 299          | 314          |
| Zr                          | 156          | 156          | 157          | 156          | 154          | 159          | 152          | 162          | 156          | 165          | 156          | 154          | 160          | 160          | 162            | 155          | 164          | 152          | 159          |
| Y                           | 34           | 34           | 35           | 34           | 33           | 34           | 32           | 35           | 33           | 36           | 35           | 34           | 35           | 36           | 34             | 35           | 37           | 32           | 35           |
| Nb                          | 11.7         | 12.8         | 12.2         | 12.7         | 12.8         | 14.5         | 13.0         | 13.5         | 12.2         | 11.8         | 11.4         | 10.9         | 14.7         | 15.8         | 13.7           | 13.4         | 13.6         | 13.1         | 14.0         |
| Ga                          | 20           | 23           | 22           | 20           | 24           | 19           | 19           | 20           | 21           | 20           | 24           | 22           | 22           | 23           | 21             | 19           | 21           | 20           | 19           |
| Cu                          | 18           | 22           | 18           | 21           | 20           | 16           | 21           | 20           | 16           | 15           | 22           | 18           | 17           | 19           | 19             | 20           | 22           | 18           | 22           |
| Zn                          | 113          | 113          | 110          | 115          | 111          | 111          | 104          | 115          | 111          | 117          | 115          | 113          | 117          | 113          | 110            | 112          | 117          | 107          | 114          |
| Pb                          | 6            | 3            | 1            | 6            | 7            | 5            | 2            | 2            | 4            | 5            | 8            | 7            | 8            | 4            | 7              | 4            | 8            | 4            | 6            |
| La                          | 26           | 20           | 25           | 25           | 41           | 38           | 39           | 22           | 15           | 13           | 5            | 4            | 29           | 22           | 13             | 19           | 19           | 0            | 0            |
| Ce                          | 45           | 44           | 53           | 48           | 18           | 0            | 0            | 54           | 45           | 35           | 43           | 40           | 44           | 47           | 39             | 47           | 37           | 0            | 0            |
| Th                          | 4            | 3            | 3            | 2            | 3            | 4            | 6            | 2            | 5            | 3            | 4            | 5            | 4            | 3            | 4              | 0            | 5            | 4            | 5            |
| Nd                          | nd           | nd           | nd           | nd           | nd           | nd           | nd           | nd           | nd           | nd           | nd           | nd           | nd           | nd           | nd             | nd           | nd           | nd           | nd           |

Paul E. Hamr  
Table DR1.

| SN             | 95101                 | 95176        | 95177        | 96100        | 96101        | 96165        | 96170        | 96173        | 96174        | 96200        | 96201        | 96203        | 96245        | 99017        | 99033        | 99160        | 99164        | 01134        | 01206        |
|----------------|-----------------------|--------------|--------------|--------------|--------------|--------------|--------------|--------------|--------------|--------------|--------------|--------------|--------------|--------------|--------------|--------------|--------------|--------------|--------------|
| WSU run        | 0596                  | 0596         | 0596         | 0897(1)      | 0897(1)      | 0202         | 0203         | 0897         | 0897         | 0202         | 0897(1)      | 0202         | 0197         | 0799         | 0799         | 0300         | 0300         | 0202         | 0202         |
| 7.5' Quad      | Cliffdell             | Weeks Table  | Weeks Table  | Old Scab Mtn | Old Scab Mtn | Cliffdell    | Cliffdell    | Cliffdell    | Cliffdell    | Old Scab Mtn | Old Scab Mtn | Old Scab Mtn | Old Scab Mtn | Cliffdell    | Cliffdell    | Weeks Table  | Nile         | Quartz Mtn   | Cliffdell    |
| UTM N*         | 5202100               | 5188190      | 5188210      | 5200590      | 5200590      | 5201200      | 5193750      | 5194630      | 5194090      | 5205960      | 5206010      | 5207360      | 5194530      | 5203490      | 5201580      | 5182130      | 5183530      | 5212155      | 5206210      |
| UTM E*         | 644290                | 644120       | 644220       | 639600       | 639600       | 645890       | 643650       | 643310       | 643600       | 641510       | 639040       | 637150       | 638330       | 645630       | 647430       | 651370       | 654230       | 648060       | 644240       |
| Unnormalized   |                       |              |              |              |              |              |              |              |              |              |              |              |              |              |              |              |              |              |              |
| SiO2           | 53.82                 | 53.88        | 53.88        | 52.41        | 53.03        | 53.92        | 54.11        | 53.64        | 52.44        | 54.06        | 53.50        | 53.74        | 53.18        | 54.47        | 54.67        | 54.47        | 54.47        | 53.86        | 54.18        |
| Al2O3          | 14.27                 | 14.42        | 14.26        | 14.10        | 13.94        | 14.18        | 14.15        | 14.26        | 13.82        | 14.30        | 14.19        | 14.36        | 13.97        | 14.42        | 14.27        | 14.20        | 14.54        | 14.44        | 14.25        |
| TiO2           | 1.739                 | 1.772        | 1.795        | 1.736        | 1.731        | 1.761        | 1.748        | 1.715        | 1.706        | 1.760        | 1.728        | 1.808        | 1.767        | 1.833        | 1.829        | 1.754        | 1.797        | 1.782        | 1.785        |
| FeO            | 10.40                 | 10.85        | 11.11        | 11.64        | 10.86        | 10.96        | 10.71        | 11.01        | 10.88        | 10.45        | 11.12        | 11.31        | 11.12        | 10.45        | 10.67        | 11.27        | 9.30         | 10.81        | 10.50        |
| MnO            | 0.191                 | 0.192        | 0.204        | 0.210        | 0.191        | 0.196        | 0.197        | 0.189        | 0.191        | 0.211        | 0.197        | 0.208        | 0.194        | 0.215        | 0.205        | 0.196        | 0.215        | 0.197        | 0.203        |
| CaO            | 8.49                  | 8.54         | 8.36         | 8.34         | 8.35         | 8.69         | 8.67         | 8.51         | 8.34         | 8.76         | 8.40         | 8.72         | 8.28         | 8.58         | 8.49         | 8.53         | 9.25         | 8.65         | 8.66         |
| MgO            | 4.74                  | 4.75         | 4.61         | 4.71         | 4.87         | 4.80         | 4.89         | 4.69         | 4.77         | 4.95         | 4.97         | 4.07         | 4.62         | 4.23         | 4.61         | 4.83         | 4.24         | 4.79         | 4.73         |
| K2O            | 1.33                  | 1.26         | 1.38         | 1.07         | 1.28         | 1.21         | 1.31         | 1.28         | 1.26         | 1.28         | 1.26         | 1.27         | 1.39         | 1.30         | 1.48         | 1.24         | 1.51         | 1.22         | 1.30         |
| Na2O           | 3.02                  | 3.16         | 3.14         | 2.85         | 2.82         | 2.98         | 2.91         | 2.89         | 2.88         | 2.97         | 2.88         | 3.05         | 2.97         | 3.05         | 2.96         | 3.03         | 2.88         | 2.92         | 2.95         |
| P2O5           | <u>0.325</u>          | <u>0.327</u> | <u>0.355</u> | <u>0.328</u> | <u>0.319</u> | <u>0.319</u> | <u>0.313</u> | <u>0.311</u> | <u>0.308</u> | <u>0.310</u> | <u>0.311</u> | <u>0.374</u> | <u>0.337</u> | <u>0.355</u> | <u>0.358</u> | <u>0.321</u> | <u>0.338</u> | <u>0.322</u> | <u>0.320</u> |
| analysis total | 98.33                 | 99.15        | 99.09        | 97.40        | 97.39        | 99.02        | 99.01        | 98.49        | 96.59        | 99.05        | 98.56        | 98.91        | 97.83        | 98.90        | 99.54        | 99.84        | 98.54        | 98.99        | 98.88        |
|                |                       |              |              |              |              |              |              |              |              |              |              |              |              |              |              |              |              |              |              |
| SiO2           | 54.74                 | 54.34        | 54.37        | 53.81        | 54.45        | 54.46        | 54.65        | 54.46        | 54.29        | 54.58        | 54.28        | 54.33        | 54.36        | 55.07        | 54.92        | 54.56        | 55.28        | 54.41        | 54.79        |
| Al2O3          | 14.51                 | 14.54        | 14.39        | 14.48        | 14.31        | 14.32        | 14.29        | 14.48        | 14.31        | 14.44        | 14.40        | 14.52        | 14.28        | 14.58        | 14.34        | 14.22        | 14.76        | 14.59        | 14.41        |
| TiO2           | 1.769                 | 1.787        | 1.811        | 1.782        | 1.777        | 1.779        | 1.766        | 1.741        | 1.766        | 1.777        | 1.753        | 1.828        | 1.806        | 1.853        | 1.837        | 1.757        | 1.824        | 1.800        | 1.805        |
| FeO*           | 10.58                 | 10.94        | 11.21        | 11.95        | 11.15        | 11.07        | 10.82        | 11.17        | 11.26        | 10.55        | 11.29        | 11.44        | 11.37        | 10.57        | 10.72        | 11.28        | 9.43         | 10.92        | 10.62        |
| MnO            | 0.194                 | 0.194        | 0.206        | 0.216        | 0.196        | 0.198        | 0.199        | 0.192        | 0.198        | 0.213        | 0.200        | 0.210        | 0.198        | 0.217        | 0.206        | 0.196        | 0.218        | 0.199        | 0.205        |
| CaO            | 8.63                  | 8.61         | 8.44         | 8.56         | 8.57         | 8.78         | 8.76         | 8.64         | 8.63         | 8.84         | 8.52         | 8.82         | 8.46         | 8.68         | 8.53         | 8.54         | 9.39         | 8.74         | 8.76         |
| MgO            | 4.82                  | 4.79         | 4.65         | 4.84         | 5.00         | 4.85         | 4.94         | 4.76         | 4.94         | 5.00         | 5.04         | 4.11         | 4.72         | 4.28         | 4.63         | 4.84         | 4.30         | 4.84         | 4.78         |
| K2O            | 1.35                  | 1.27         | 1.39         | 1.10         | 1.31         | 1.22         | 1.32         | 1.30         | 1.30         | 1.29         | 1.28         | 1.42         | 1.31         | 1.49         | 1.49         | 1.24         | 1.53         | 1.23         | 1.31         |
| Na2O           | 3.07                  | 3.19         | 3.17         | 2.93         | 2.90         | 3.01         | 2.94         | 2.93         | 2.98         | 3.00         | 2.92         | 3.08         | 3.04         | 3.08         | 2.97         | 3.03         | 2.92         | 2.95         | 2.98         |
| P2O5           | <u>0.331</u>          | <u>0.330</u> | <u>0.358</u> | <u>0.337</u> | <u>0.328</u> | <u>0.322</u> | <u>0.316</u> | <u>0.316</u> | <u>0.319</u> | <u>0.313</u> | <u>0.316</u> | <u>0.378</u> | <u>0.344</u> | <u>0.359</u> | <u>0.360</u> | <u>0.322</u> | <u>0.343</u> | <u>0.325</u> | <u>0.324</u> |
|                | 100.00                | 100.00       | 100.00       | 100.00       | 100.00       | 100.00       | 100.00       | 100.00       | 100.00       | 100.00       | 100.00       | 100.00       | 100.00       | 100.00       | 100.00       | 100.00       | 100.00       | 100.00       | 100.00       |
|                |                       |              |              |              |              |              |              |              |              |              |              |              |              |              |              |              |              |              |              |
| Unnormalized   | Trace Elements (ppm): |              |              |              |              |              |              |              |              |              |              |              |              |              |              |              |              |              |              |
| Ni             | 9                     | 6            | 6            | 6            | 5            | 12           | 14           | 4            | 4            | 11           | 6            | 6            | 0            | 11           | 9            | 10           | 16           | 13           | 13           |
| Cr             | 38                    | 38           | 37           | 52           | 45           | 52           | 50           | 48           | 46           | 57           | 44           | 47           | 42           | 53           | 51           | 49           | 48           | 57           | 50           |
| Sc             | †56                   | 51           | 50           | 32           | 27           | 36           | 40           | 29           | 34           | 40           | 30           | 45           | 31           | 41           | 38           | 35           | 37           | 40           | 38           |
| V              | 317                   | 329          | 301          | 309          | 309          | 292          | 282          | 316          | 314          | 315          | 310          | 315          | 289          | 297          | 299          | 294          | 303          | 306          | 320          |
| Ba             | 630                   | 596          | 593          | 508          | 556          | 533          | 529          | 514          | 532          | 543          | 556          | 585          | 559          | 576          | 586          | 524          | 864          | 582          | 522          |
| Rb             | 31                    | 30           | 32           | 26           | 32           | 30           | 31           | 32           | 32           | 33           | 32           | 32           | 35           | 32           | 34           | 32           | 33           | 32           | 31           |
| Sr             | 314                   | 316          | 316          | 325          | 309          | 317          | 311          | 314          | 311          | 309          | 313          | 317          | 313          | 322          | 309          | 314          | 334          | 315          | 312          |
| Zr             | 153                   | 156          | 161          | 149          | 156          | 158          | 157          | 153          | 154          | 153          | 157          | 158          | 158          | 164          | 162          | 155          | 161          | 158          | 158          |
| Y              | 32                    | 32           | 34           | 33           | 33           | 35           | 34           | 33           | 33           | 33           | 33           | 35           | 33           | 36           | 37           | 33           | 34           | 35           | 35           |
| Nb             | 13.6                  | 13.4         | 13.6         | 12.3         | 12.6         | 11.4         | 12.7         | 12.9         | 12.2         | 10.4         | 12.8         | 11.5         | 11.7         | 13.0         | 12.4         | 11.5         | 12.5         | 11.5         | 11.7         |
| Ga             | 22                    | 23           | 26           | 24           | 23           | 19           | 23           | 23           | 18           | 20           | 22           | 22           | 20           | 21           | 20           | 21           | 20           | 21           | 21           |
| Cu             | 14                    | 21           | 14           | 26           | 20           | 28           | 28           | 20           | 19           | 27           | 17           | 28           | 17           | 28           | 25           | 25           | 27           | 29           | 30           |
| Zn             | 108                   | †118         | 114          | 112          | 109          | 112          | 108          | 106          | 108          | 108          | 107          | 112          | 116          | 121          | 115          | 109          | 116          | 112          | 114          |
| Pb             | 3                     | 6            | 6            | 6            | 7            | 6            | 14           | 7            | 6            | 9            | 5            | 6            | 6            | 5            | 8            | 10           | 5            | 7            | 6            |
| La             | 15                    | 11           | 10           | 21           | 16           | 28           | 24           | 4            | 14           | 17           | 16           | 18           | 37           | 23           | 29           | 21           | 27           | 20           | 26           |
| Ce             | 0                     | 0            | 2            | 41           | 54           | 54           | 53           | 25           | 47           | 37           | 47           | 51           | 42           | 34           | 34           | 32           | 42           | 57           | 44           |
| Th             | 4                     | 5            | 6            | 2            | 6            | 3            | 5            | 5            | 5            | 7            | 1            | 6            | 5            | 4            | 6            | 3            | 6            | 6            | 4            |
| Nd             | nd                    | nd           | nd           | nd           | nd           | nd           | nd           | nd           | nd           | nd           | nd           | nd           | nd           | nd           | nd           | nd           | nd           | nd           | nd           |

Paul E. Hamr  
Table DR1.

| SN             | 02030        | 02039        | 02040        | 02072        | 02075        | 02102         | 02120        | 02122        | 02123        | 02127        | 02138        | 02139        | 02151        | 02202        | 02208        | 02209        | 03044        | 03047        | 03095        |
|----------------|--------------|--------------|--------------|--------------|--------------|---------------|--------------|--------------|--------------|--------------|--------------|--------------|--------------|--------------|--------------|--------------|--------------|--------------|--------------|
| WSU run        | 0402         | 0402         | 0402         | 0402         | 0303         | 0402          | 0402         | 0402         | 0402         | 0402         | 0402         | 0402         | 0402         | 0402         | 0402         | 0303         | 0204         | 0204         | 0204         |
| 7.5' Quad      | Cliffdell    | Cliffdell    | Cliffdell    | Cliffdell    | Old Scab Mtn | Imberwolf Mtn | Mt. Clifty   | Mt. Clifty   | Mt. Clifty   | Mt. Clifty   | Tieton Basin | Tieton Basin | Old Scab Mtn | Old Scab Mtn | Cliffdell    | Cliffdell    | Mt. Clifty   | Mt. Clifty   | Mt. Clifty   |
| UTM N*         | 5199920      | 5201900      | 5200920      | 5197540      | 5194460      | 5188910       | 5207260      | 5210100      | 5210240      | 5211260      | 5175320      | 5174950      | 5194600      | 5204650      | 5202180      | 5201280      | 5211580      | 5212360      | 5208240      |
| UTM E*         | 645820       | 644290       | 645940       | 643960       | 641320       | 642200        | 640240       | 640100       | 639280       | 637400       | 644050       | 644820       | 639720       | 642480       | 646230       | 646550       | 637270       | 636320       | 640650       |
| Unnormalized   |              |              |              |              |              |               |              |              |              |              |              |              |              |              |              |              |              |              |              |
| SiO2           | 54.09        | 54.40        | 54.72        | 53.43        | 54.02        | 54.30         | 54.00        | 53.98        | 53.76        | 53.81        | 54.16        | 53.95        | 53.87        | 54.19        | 54.46        | 54.18        | 53.99        | 53.85        | 53.85        |
| Al2O3          | 14.22        | 14.08        | 14.13        | 13.97        | 14.24        | 14.33         | 14.21        | 14.26        | 14.09        | 13.97        | 14.05        | 14.15        | 14.22        | 13.99        | 14.20        | 14.07        | 14.14        | 14.31        | 14.24        |
| TiO2           | 1.756        | 1.786        | 1.812        | 1.807        | 1.740        | 1.761         | 1.757        | 1.761        | 1.729        | 1.757        | 1.792        | 1.743        | 1.748        | 1.815        | 1.792        | 1.797        | 1.729        | 1.736        | 1.729        |
| FeO            | 11.02        | 11.33        | 11.03        | 11.33        | 10.71        | 10.59         | 10.71        | 10.85        | 11.36        | 11.30        | 11.31        | 10.87        | 10.94        | 11.28        | 11.08        | 11.20        | 11.52        | 11.33        | 11.54        |
| MnO            | 0.188        | 0.195        | 0.198        | 0.209        | 0.195        | 0.195         | 0.200        | 0.196        | 0.199        | 0.220        | 0.199        | 0.195        | 0.196        | 0.210        | 0.214        | 0.196        | 0.199        | 0.217        | 0.196        |
| CaO            | 8.65         | 8.44         | 8.42         | 9.03         | 8.65         | 8.70          | 8.70         | 8.70         | 8.67         | 8.48         | 8.43         | 8.65         | 8.61         | 8.39         | 8.55         | 8.51         | 8.55         | 8.64         | 8.58         |
| MgO            | 4.33         | 4.49         | 4.66         | 4.69         | 4.91         | 4.80          | 4.84         | 4.81         | 4.83         | 4.64         | 4.59         | 4.68         | 4.89         | 4.48         | 4.02         | 4.59         | 5.01         | 4.87         | 4.92         |
| K2O            | 1.27         | 1.28         | 1.28         | 1.21         | 1.25         | 1.28          | 1.18         | 1.17         | 1.11         | 1.16         | 1.38         | 1.40         | 1.25         | 1.35         | 1.30         | 1.19         | 1.14         | 0.98         | 1.24         |
| Na2O           | 2.89         | 2.97         | 2.89         | 2.86         | 2.90         | 2.86          | 2.94         | 2.92         | 2.92         | 2.95         | 2.94         | 2.87         | 2.91         | 2.97         | 2.97         | 2.91         | 3.01         | 3.01         | 2.94         |
| P2O5           | <u>0.315</u> | <u>0.342</u> | <u>0.354</u> | <u>0.325</u> | <u>0.312</u> | <u>0.311</u>  | <u>0.310</u> | <u>0.313</u> | <u>0.303</u> | <u>0.321</u> | <u>0.344</u> | <u>0.310</u> | <u>0.316</u> | <u>0.349</u> | <u>0.348</u> | <u>0.347</u> | <u>0.316</u> | <u>0.313</u> | <u>0.309</u> |
| analysis total | 98.73        | 99.31        | 99.50        | 98.86        | 98.93        | 99.13         | 98.85        | 98.96        | 98.97        | 98.60        | 99.20        | 98.82        | 98.95        | 99.03        | 98.94        | 98.99        | 99.61        | 99.26        | 99.54        |
|                |              |              |              |              |              |               |              |              |              |              |              |              |              |              |              |              |              |              |              |
| SiO2           | 54.79        | 54.78        | 55.00        | 54.04        | 54.60        | 54.78         | 54.63        | 54.55        | 54.32        | 54.57        | 54.60        | 54.59        | 54.44        | 54.72        | 55.05        | 54.73        | 54.20        | 54.26        | 54.10        |
| Al2O3          | 14.40        | 14.18        | 14.20        | 14.13        | 14.39        | 14.46         | 14.38        | 14.41        | 14.24        | 14.17        | 14.16        | 14.32        | 14.37        | 14.13        | 14.35        | 14.21        | 14.20        | 14.42        | 14.30        |
| TiO2           | 1.779        | 1.798        | 1.821        | 1.828        | 1.759        | 1.777         | 1.777        | 1.780        | 1.747        | 1.782        | 1.807        | 1.764        | 1.767        | 1.833        | 1.811        | 1.815        | 1.736        | 1.749        | 1.737        |
| FeO*           | 11.16        | 11.41        | 11.09        | 11.46        | 10.83        | 10.68         | 10.83        | 10.96        | 11.48        | 11.46        | 11.40        | 11.00        | 11.06        | 11.39        | 11.20        | 11.31        | 11.57        | 11.41        | 11.59        |
| MnO            | 0.190        | 0.196        | 0.199        | 0.211        | 0.197        | 0.197         | 0.202        | 0.198        | 0.201        | 0.223        | 0.201        | 0.197        | 0.198        | 0.212        | 0.216        | 0.198        | 0.200        | 0.219        | 0.197        |
| CaO            | 8.76         | 8.50         | 8.46         | 9.13         | 8.74         | 8.78          | 8.80         | 8.79         | 8.76         | 8.60         | 8.50         | 8.75         | 8.70         | 8.47         | 8.64         | 8.60         | 8.58         | 8.70         | 8.62         |
| MgO            | 4.39         | 4.52         | 4.68         | 4.74         | 4.96         | 4.84          | 4.90         | 4.86         | 4.88         | 4.71         | 4.63         | 4.74         | 4.94         | 4.52         | 4.06         | 4.64         | 5.03         | 4.90         | 4.94         |
| K2O            | 1.29         | 1.29         | 1.29         | 1.22         | 1.26         | 1.29          | 1.19         | 1.18         | 1.12         | 1.18         | 1.39         | 1.42         | 1.26         | 1.36         | 1.31         | 1.20         | 1.15         | 0.99         | 1.25         |
| Na2O           | 2.93         | 2.99         | 2.90         | 2.89         | 2.93         | 2.89          | 2.97         | 2.95         | 2.95         | 2.99         | 2.96         | 2.90         | 2.94         | 3.00         | 3.00         | 2.94         | 3.02         | 3.04         | 2.95         |
| P2O5           | <u>0.319</u> | <u>0.344</u> | <u>0.356</u> | <u>0.329</u> | <u>0.315</u> | <u>0.314</u>  | <u>0.314</u> | <u>0.316</u> | <u>0.306</u> | <u>0.326</u> | <u>0.347</u> | <u>0.314</u> | <u>0.319</u> | <u>0.352</u> | <u>0.352</u> | <u>0.351</u> | <u>0.318</u> | <u>0.316</u> | <u>0.311</u> |
|                | 100.00       | 100.00       | 100.00       | 100.00       | 100.00       | 100.00        | 100.00       | 100.00       | 100.00       | 100.00       | 100.00       | 100.00       | 100.00       | 100.00       | 100.00       | 100.00       | 100.00       | 100.00       | 100.00       |
| Unnormalized   |              |              |              |              |              |               |              |              |              |              |              |              |              |              |              |              |              |              |              |
| Ni             | 11           | 11           | 14           | 18           | 16           | 11            | 13           | 11           | 11           | 12           | 13           | 8            | 14           | 11           | 14           | 14           | 13           | 12           | 11           |
| Cr             | 52           | 47           | 43           | 55           | 50           | 51            | 49           | 50           | 49           | 48           | 48           | 50           | 46           | 51           | 47           | 45           | 38           | 39           | 38           |
| Sc             | 34           | 35           | 37           | 38           | 42           | 38            | 31           | 40           | 39           | 34           | 39           | 39           | 36           | 35           | 35           | 34           | 34           | 35           | 34           |
| V              | 298          | 294          | 285          | 294          | 303          | 300           | 308          | 307          | 307          | 303          | 304          | 312          | 301          | 290          | 290          | 296          | 312          | 309          | 308          |
| Ba             | 525          | 554          | 579          | 483          | 566          | 546           | 520          | 511          | 511          | 527          | 544          | 512          | 547          | 551          | 550          | 536          | 535          | 514          | 542          |
| Rb             | 33           | 34           | 33           | 26           | 31           | 32            | 29           | 32           | 32           | 32           | 33           | 32           | 31           | 34           | 35           | 32           | 33           | 31           | 33           |
| Sr             | 314          | 314          | 310          | 312          | 310          | 316           | 309          | 310          | 308          | 312          | 311          | 315          | 309          | 310          | 314          | 313          | 313          | 319          | 312          |
| Zr             | 159          | 162          | 161          | 152          | 153          | 154           | 155          | 154          | 154          | 159          | 162          | 155          | 156          | 165          | 163          | 162          | 160          | 162          | 160          |
| Y              | 34           | 34           | 36           | 34           | 33           | 34            | 34           | 33           | 32           | 35           | 34           | 34           | 33           | 35           | 35           | 35           | 33           | 33           | 32           |
| Nb             | 11.6         | 12.0         | 11.9         | 9.7          | 12.4         | 11.0          | 10.7         | 11.9         | 12.0         | 11.9         | 12.2         | 12.2         | 11.9         | 11.8         | 11.6         | 12.3         | 11.1         | 10.8         | 10.5         |
| Ga             | 19           | 21           | 22           | 19           | 21           | 24            | 17           | 23           | 20           | 20           | 20           | 20           | 18           | 19           | 20           | 21           | 19           | 21           | 20           |
| Cu             | 32           | 28           | 25           | 31           | 27           | 27            | 29           | 30           | 27           | 28           | 29           | 26           | 28           | 28           | 30           | 25           | 27           | 24           | 24           |
| Zn             | 112          | 113          | 118          | 112          | 111          | 116           | 114          | 111          | 109          | 115          | 116          | 112          | 111          | 118          | 113          | 109          | 114          | 115          | 113          |
| Pb             | 8            | 5            | 6            | 5            | 5            | 5             | 7            | 7            | 6            | 7            | 4            | 9            | 7            | 5            | 10           | 4            | 7            | 9            | 6            |
| La             | 70           | 23           | 32           | 17           | 33           | 20            | 22           | 29           | 13           | 22           | 16           | 21           | 28           | 19           | 22           | 27           | 22           | 20           | 20           |
| Ce             | 56           | 48           | 36           | 43           | 35           | 63            | 51           | 44           | 39           | 42           | 54           | 47           | 44           | 45           | 48           | 18           | 48           | 39           | 44           |
| Th             | 3            | 5            | 5            | 4            | 3            | 7             | 5            | 4            | 6            | 7            | 2            | 8            | 4            | 4            | 5            | 3            | 3            | 5            | 4            |
| Nd             | nd           | nd           | nd           | nd           | nd           | nd            | nd           | nd           | nd           | nd           | nd           | nd           | nd           | nd           | nd           | nd           | nd           | nd           | nd           |

Paul E. Hamr  
Table DR1.

|                                                 | M1           |              |              |              |              |              |              |              |              |              |              |              |              |              |              |              |              |              |              |
|-------------------------------------------------|--------------|--------------|--------------|--------------|--------------|--------------|--------------|--------------|--------------|--------------|--------------|--------------|--------------|--------------|--------------|--------------|--------------|--------------|--------------|
| SN                                              | '04049       | 04096        | 04098        | 04122        | 04125        | 04133        | 04189        | 04215        | 04230        | 05019        | 05021        | 05022        | 05024        | 05027        | 05046        | 05068        | 05069        | 05070        | 05071        |
| WSU run                                         | 0404(1)      | 0404(2)      | 0404(2)      | 0404(2)      | 0405(4)      | 0405(4)      | 0504(1)      | 0504(2)      | 0504(1)      | 0305(1)      | 0305(1)      | 0305         | 0305(1)      | 0405(4)      | 0305(1)      | 0305(2)      | 0305(2)      | 0305(2)      | %0305        |
| 7.5' Quad                                       | Nile         | Ianastash    | LakManastash | LaManastash  | LaManastash  | LaManastash  | Lak Meeks    | Table        | Ianastash    | Lak Meeks    | Table        | Tieton Basin | Veddle Canyo | Nile         | Nile         |
| UTM N*                                          | 5182740      | 5200460      | 5202190      | 5196550      | 5195440      | 5202260      | 5192110      | 5196640      | 5197590      | 5172980      | 5174470      | 5172980      | 5174680      | 5174620      | 5175380      | 5184630      | 5184620      | 5184660      | 5184880      |
| UTM E*                                          | 657570       | 656280       | 657220       | 656640       | 658530       | 655820       | 644340       | 657130       | 659470       | 649080       | 648640       | 648600       | 651300       | 649480       | 657420       | 658010       | 658060       | 658015       | 658015       |
| Unnormalized                                    |              |              |              |              |              |              |              |              |              |              |              |              |              |              |              |              |              |              |              |
| SiO2                                            | 54.48        | 54.22        | 54.03        | 54.31        | 54.02        | 54.23        | 54.31        | 54.28        | 54.37        | 54.59        | 53.98        | 54.56        | 54.24        | 54.06        | 54.45        | 54.02        | 54.52        | 54.16        | 55.05        |
| Al2O3                                           | 14.35        | 14.16        | 14.14        | 14.18        | 14.10        | 14.12        | 1.809        | 14.15        | 1.766        | 14.18        | 14.07        | 14.20        | 14.06        | 14.08        | 14.35        | 13.96        | 14.35        | 14.12        | 14.39        |
| TiO2                                            | 1.778        | 1.817        | 1.814        | 1.829        | 1.765        | 1.785        | 14.09        | 1.814        | 14.18        | 1.790        | 1.747        | 1.809        | 1.746        | 1.794        | 1.757        | 1.789        | 1.747        | 1.742        | 1.750        |
| FeO                                             | 11.06        | 11.25        | 11.33        | 11.13        | 10.63        | 10.95        | 10.96        | 10.75        | 10.86        | 11.06        | 10.98        | 10.77        | 11.03        | 10.99        | 10.65        | 10.83        | 10.20        | 10.89        | 10.35        |
| MnO                                             | 0.199        | 0.203        | 0.201        | 0.204        | 0.170        | 0.194        | 0.196        | 0.195        | 0.190        | 0.198        | 0.196        | 0.196        | 0.197        | 0.194        | 0.204        | 0.203        | 0.193        | 0.195        | 0.200        |
| CaO                                             | 8.60         | 8.48         | 8.45         | 8.46         | 8.19         | 8.36         | 4.55         | 8.36         | 4.42         | 8.60         | 8.55         | 8.55         | 8.51         | 8.35         | 8.73         | 8.36         | 8.67         | 8.56         | 8.75         |
| MgO                                             | 4.79         | 4.68         | 4.66         | 4.59         | 3.79         | 4.52         | 4.38         | 4.42         | 4.38         | 4.04         | 4.72         | 4.30         | 4.69         | 4.59         | 4.69         | 4.62         | 4.54         | 4.71         | 4.60         |
| K2O                                             | 1.27         | 1.37         | 1.34         | 1.44         | 1.29         | 1.39         | 3.00         | 1.45         | 2.84         | 1.37         | 1.33         | 1.49         | 1.32         | 1.29         | 1.39         | 1.50         | 1.38         | 1.43         | 1.47         |
| Na2O                                            | 2.97         | 3.04         | 2.97         | 2.95         | 2.83         | 2.95         | 1.33         | 2.93         | 1.31         | 2.89         | 2.91         | 2.96         | 2.99         | 2.97         | 2.98         | 2.87         | 2.93         | 2.88         | 2.88         |
| P2O5                                            | <u>0.321</u> | <u>0.359</u> | <u>0.350</u> | <u>0.359</u> | <u>0.329</u> | <u>0.340</u> | <u>0.363</u> | <u>0.354</u> | <u>0.331</u> | <u>0.350</u> | <u>0.318</u> | <u>0.351</u> | <u>0.322</u> | <u>0.341</u> | <u>0.320</u> | <u>0.346</u> | <u>0.324</u> | <u>0.318</u> | <u>0.319</u> |
| analysis total                                  | 99.82        | 99.56        | 99.28        | 99.47        | 97.11        | 98.84        | 98.89        | 98.66        | 98.70        | 99.07        | 98.79        | 99.20        | 99.10        | 98.65        | 99.52        | 98.50        | 98.87        | 99.02        | 99.76        |
| Normalized Major Elements (Weight %):           |              |              |              |              |              |              |              |              |              |              |              |              |              |              |              |              |              |              |              |
| SiO2                                            | 54.58        | 54.46        | 54.42        | 54.61        | 55.63        | 54.87        | 54.92        | 55.02        | 55.08        | 55.11        | 54.64        | 55.01        | 54.73        | 54.80        | 54.71        | 54.84        | 55.15        | 54.70        | 55.18        |
| Al2O3                                           | 14.38        | 14.22        | 14.24        | 14.26        | 14.52        | 14.29        | 14.24        | 14.34        | 14.37        | 14.31        | 14.24        | 14.32        | 14.19        | 14.27        | 14.42        | 14.18        | 14.51        | 14.26        | 14.43        |
| TiO2                                            | 1.781        | 1.825        | 1.827        | 1.839        | 1.817        | 1.806        | 1.830        | 1.838        | 1.790        | 1.807        | 1.768        | 1.824        | 1.762        | 1.819        | 1.766        | 1.817        | 1.767        | 1.759        | 1.754        |
| FeO*                                            | 11.08        | 11.29        | 11.41        | 11.19        | 10.94        | 11.08        | 11.08        | 10.89        | 11.00        | 11.16        | 11.12        | 10.86        | 11.13        | 11.14        | 10.70        | 11.00        | 10.32        | 11.00        | 10.37        |
| MnO                                             | 0.199        | 0.204        | 0.202        | 0.205        | 0.175        | 0.196        | 0.198        | 0.197        | 0.192        | 0.200        | 0.198        | 0.198        | 0.199        | 0.197        | 0.205        | 0.206        | 0.195        | 0.197        | 0.200        |
| CaO                                             | 8.61         | 8.51         | 8.51         | 8.51         | 8.43         | 8.45         | 8.38         | 8.48         | 8.55         | 8.68         | 8.65         | 8.62         | 8.58         | 8.46         | 8.77         | 8.49         | 8.77         | 8.65         | 8.77         |
| MgO                                             | 4.80         | 4.70         | 4.69         | 4.62         | 3.90         | 4.57         | 4.60         | 4.44         | 4.48         | 4.08         | 4.77         | 4.33         | 4.73         | 4.65         | 4.72         | 4.69         | 4.59         | 4.76         | 4.61         |
| K2O                                             | 1.27         | 1.38         | 1.35         | 1.45         | 1.32         | 1.41         | 1.34         | 1.47         | 1.32         | 1.39         | 1.34         | 1.51         | 1.33         | 1.31         | 1.40         | 1.52         | 1.40         | 1.45         | 1.47         |
| Na2O                                            | 2.98         | 3.05         | 2.99         | 2.97         | 2.92         | 2.98         | 3.03         | 2.97         | 2.88         | 2.92         | 2.95         | 2.99         | 3.02         | 3.01         | 2.99         | 2.91         | 2.97         | 2.91         | 2.88         |
| P2O5                                            | <u>0.321</u> | <u>0.360</u> | <u>0.353</u> | <u>0.361</u> | <u>0.339</u> | <u>0.344</u> | <u>0.367</u> | <u>0.359</u> | <u>0.335</u> | <u>0.353</u> | <u>0.322</u> | <u>0.354</u> | <u>0.325</u> | <u>0.346</u> | <u>0.321</u> | <u>0.351</u> | <u>0.328</u> | <u>0.321</u> | <u>0.319</u> |
|                                                 | 100.00       | 100.00       | 100.00       | 100.00       | 100.00       | 100.00       | 100.00       | 100.00       | 100.00       | 100.00       | 100.00       | 100.00       | 100.00       | 100.00       | 100.00       | 100.00       | 100.00       | 100.00       | 100.00       |
| Unnormalized Unnormalized Trace Elements (ppm): |              |              |              |              |              |              |              |              |              |              |              |              |              |              |              |              |              |              |              |
| Ni                                              | 14           | 16           | 14           | 17           | 14           | 16           | 15           | 13           | 13           | 18           | 19           | 19           | 19           | 16           | 22           | 17           | 18           | 19           | 22           |
| Cr                                              | 38           | 40           | 35           | 37           | 41           | 41           | 39           | 38           | 41           | 41           | 42           | 41           | 42           | 37           | 44           | 39           | 42           | 42           | 44           |
| Sc                                              | 35           | 35           | 35           | 36           | 35           | 35           | 35           | 35           | 36           | 37           | 35           | 37           | 36           | 38           | 36           | 35           | 37           | 37           | 36           |
| V                                               | 312          | 299          | 306          | 303          | 300          | 299          | 293          | 302          | 302          | 301          | 310          | 304          | 309          | 302          | 310          | 299          | 310          | 310          | 315          |
| Ba                                              | 580          | 562          | 589          | 601          | 807          | 571          | <b>593</b>   | 596          | 571          | <b>575</b>   | <b>563</b>   | 572          | 549          | 570          | 554          | 557          | 576          | 573          | 556          |
| Rb                                              | 33           | 34           | 35           | 34           | 35           | 34           | 34           | 34           | 33           | 37           | 33           | 36           | 35           | 33           | 33           | 34           | 33           | 34           | 33           |
| Sr                                              | 319          | 311          | 314          | 315          | 332          | 314          | 299          | 305          | 310          | 328          | 318          | 322          | 318          | 314          | 324          | 315          | 326          | 317          | 325          |
| Zr                                              | 159          | 163          | 162          | 164          | 163          | 164          | 156          | 158          | 153          | 168          | 163          | 170          | 163          | 164          | 164          | 167          | 163          | 162          | 161          |
| Y                                               | 32           | 34           | 34           | 35           | 39           | 36           | 34           | 35           | 33           | 36           | 34           | 36           | 34           | 37           | 35           | 35           | 34           | 35           | 33           |
| Nb                                              | 12.3         | 12.3         | 11.6         | 12.3         | 11.7         | 11.9         | 12.4         | 11.0         | 11.2         | 11.5         | 11.0         | 11.6         | 10.1         | 10.9         | 10.5         | 12.3         | 10.9         | 11.0         | 11.4         |
| Ga                                              | 20           | 22           | 19           | 19           | 21           | 20           | 20           | 20           | 19           | 20           | 19           | 21           | 21           | 21           | 21           | 21           | 20           | 20           | 21           |
| Cu                                              | 19           | 19           | 16           | 19           | 24           | 24           | 20           | 21           | 22           | 25           | 26           | 25           | 26           | 26           | 22           | 24           | 27           | 31           | 26           |
| Zn                                              | 114          | 116          | 117          | 121          | 123          | 117          | 113          | 116          | 113          | 116          | 113          | 116          | 114          | 117          | 112          | 116          | 114          | 118          | 116          |
| Pb                                              | 7            | 5            | 6            | 6            | 6            | 7            | 8            | 8            | 6            | 4            | 4            | 5            | 5            | 7            | 4            | 4            | 5            | 5            | 4            |
| La                                              | 21           | 19           | 22           | 22           | 25           | 25           | 22           | 18           | 19           | 22           | 21           | 22           | 21           | 23           | 20           | 21           | 22           | 22           | 22           |
| Ce                                              | 48           | 49           | 50           | 47           | 48           | 48           | 48           | 41           | 46           | 47           | 45           | 46           | 50           | 42           | 45           | 44           | 47           | 47           | 44           |
| Th                                              | 4            | 3            | 3            | 3            | 4            | 3            | 4            | 5            | 4            | 2            | 1            | 1            | 1            | 3            | 1            | 1            | 2            | 1            | 1            |
| Nd                                              | 28           | 26           | 29           | 28           | 25           | 26           | 27           | 25           | 27           | 26           | 25           | 25           | 27           | 27           | 26           | 27           | 26           | 26           | 25           |

Paul E. Hamr  
Table DR1.

|                |              | M1           | M1           |              |              |               |              | M1           |              |               |               |              |              |              |              |              |              |              | MUSEUM-1     |
|----------------|--------------|--------------|--------------|--------------|--------------|---------------|--------------|--------------|--------------|---------------|---------------|--------------|--------------|--------------|--------------|--------------|--------------|--------------|--------------|
| SN             | 05093        | 05094        | 05110        | 05138        | 05139        | 05142         | 06006        | 06012        | 06029        | 06090         | 06126         | 06174        | 07009        | 07024        | 07028        | 07091        | 08022        | 08030        | 10069        |
| WSU run        | 0305(2)      | 0405(3)      | 0405(2)      | 0405(2)      | 0405(2)      | 0405(2)       | 0106(3)      | 0106(3)      | 0106(4)      | 0206          | 0306(1)       | 0306(2)      | 0107(3)      | 0207         | 0207         | 0307         | 0108(2)      | 0108(2)      | 0210         |
| 7.5' Quad      | Tieton Basin | Veddle Canyo | Veddle Canyo | lanastash La | lanastash La | lanastash Lak | Nile         | Veddle Canyo | Cliffdell    | lanastash Lak | lanastash Lak | Veddle Canyo | Cliffdell    | Veddle Canyo | Veddle Canyo | Frost Mtn    | Tieton       | Nile         | Quartz Mtn   |
| UTM N*         | 5174320      | 5178700      | 5173740      | 5197410      | 5196100      | 5195710       | 5184180      | 5174490      | 5203970      | 5204600       | 5206820       | 5175720      | 5203720      | 5175220      | 5175680      | 5210160      | 5176820      | 5181660      | 5211680      |
| UTM E*         | 651900       | 656570       | 659550       | 658230       | 656350       | 656110        | 658060       | 655800       | 644060       | 657040        | 654010        | 660100       | 646460       | 659420       | 655250       | 657750       | 666300       | 660170       | 648300       |
| Unnormalized   |              |              |              |              |              |               |              |              |              |               |               |              |              |              |              |              |              |              |              |
| SiO2           | 53.88        | 54.33        | 53.38        | 53.35        | 54.06        | 54.20         | 54.22        | 54.28        | 53.65        | 53.27         | 54.43         | 54.62        | 53.84        | 53.38        | 53.78        | 52.92        | 53.48        | 54.16        | 53.61        |
| Al2O3          | 14.03        | 14.31        | 14.11        | 14.03        | 14.11        | 14.23         | 14.06        | 14.41        | 13.94        | 14.00         | 14.29         | 14.18        | 14.12        | 14.01        | 14.08        | 13.91        | 13.95        | 14.34        | 14.02        |
| TiO2           | 1.740        | 1.759        | 1.724        | 1.769        | 1.783        | 1.752         | 1.802        | 1.755        | 1.774        | 1.736         | 1.808         | 1.846        | 1.739        | 1.808        | 1.736        | 1.724        | 1.738        | 1.799        | 1.749        |
| FeO            | 10.43        | 10.74        | 10.64        | 10.28        | 10.60        | 10.66         | 11.03        | 10.47        | 10.84        | 10.81         | 10.99         | 11.02        | 10.98        | 11.15        | 10.72        | 10.90        | 10.58        | 10.20        | 11.08        |
| MnO            | 0.196        | 0.195        | 0.192        | 0.194        | 0.200        | 0.182         | 0.200        | 0.195        | 0.202        | 0.195         | 0.195         | 0.203        | 0.198        | 0.197        | 0.189        | 0.191        | 0.185        | 0.184        | 0.191        |
| CaO            | 8.51         | 8.50         | 8.49         | 8.65         | 8.37         | 8.27          | 8.31         | 8.66         | 8.32         | 8.35          | 8.41          | 8.39         | 8.51         | 8.31         | 8.37         | 8.35         | 8.40         | 8.52         | 8.47         |
| MgO            | 4.59         | 4.77         | 4.83         | 4.71         | 4.49         | 4.25          | 4.63         | 4.71         | 4.46         | 4.69          | 4.61          | 4.41         | 4.78         | 4.23         | 4.44         | 4.72         | 4.48         | 4.58         | 4.80         |
| K2O            | 1.39         | 1.32         | 1.28         | 1.43         | 1.45         | 1.29          | 1.35         | 1.38         | 1.29         | 1.25          | 1.36          | 1.47         | 1.26         | 1.30         | 1.31         | 1.20         | 1.31         | 1.42         | 1.17         |
| Na2O           | 2.89         | 3.03         | 2.94         | 2.90         | 2.95         | 2.84          | 2.96         | 2.94         | 2.96         | 2.86          | 2.90          | 2.97         | 2.93         | 3.00         | 2.88         | 2.85         | 2.82         | 2.97         | 3.03         |
| P2O5           | <u>0.318</u> | <u>0.327</u> | <u>0.305</u> | <u>0.334</u> | <u>0.341</u> | <u>0.315</u>  | <u>0.347</u> | <u>0.314</u> | <u>0.336</u> | <u>0.315</u>  | <u>0.345</u>  | <u>0.361</u> | <u>0.314</u> | <u>0.361</u> | <u>0.321</u> | <u>0.304</u> | <u>0.322</u> | <u>0.329</u> | <u>0.314</u> |
| analysis total | 97.98        | 99.28        | 97.89        | 97.11        | 98.36        | 97.99         | 98.91        | 99.12        | 97.77        | 97.47         | 99.33         | 99.47        | 98.66        | 97.75        | 97.82        | 97.07        | 97.26        | 98.50        | 98.46        |
|                |              |              |              |              |              |               |              |              |              |               |               |              |              |              |              |              |              |              |              |
| SiO2           | 54.99        | 54.73        | 54.53        | 54.94        | 54.96        | 55.31         | 54.82        | 54.76        | 54.87        | 54.65         | 54.79         | 54.91        | 54.57        | 54.61        | 54.97        | 54.51        | 54.98        | 54.98        | 54.45        |
| Al2O3          | 14.32        | 14.41        | 14.42        | 14.44        | 14.35        | 14.52         | 14.21        | 14.54        | 14.26        | 14.36         | 14.38         | 14.26        | 14.31        | 14.34        | 14.39        | 14.33        | 14.34        | 14.56        | 14.24        |
| TiO2           | 1.776        | 1.771        | 1.762        | 1.822        | 1.813        | 1.788         | 1.822        | 1.770        | 1.815        | 1.781         | 1.820         | 1.856        | 1.762        | 1.850        | 1.775        | 1.776        | 1.787        | 1.827        | 1.777        |
| FeO*           | 10.65        | 10.82        | 10.87        | 10.58        | 10.78        | 10.88         | 11.15        | 10.56        | 11.08        | 11.09         | 11.06         | 11.08        | 11.13        | 11.41        | 10.96        | 11.23        | 10.88        | 10.36        | 11.26        |
| MnO            | 0.200        | 0.196        | 0.196        | 0.200        | 0.204        | 0.186         | 0.202        | 0.197        | 0.207        | 0.200         | 0.197         | 0.204        | 0.201        | 0.201        | 0.193        | 0.197        | 0.191        | 0.187        | 0.194        |
| CaO            | 8.69         | 8.56         | 8.68         | 8.90         | 8.51         | 8.44          | 8.40         | 8.73         | 8.50         | 8.56          | 8.46          | 8.43         | 8.62         | 8.50         | 8.55         | 8.60         | 8.64         | 8.65         | 8.61         |
| MgO            | 4.69         | 4.81         | 4.93         | 4.31         | 4.56         | 4.34          | 4.68         | 4.76         | 4.56         | 4.82          | 4.64          | 4.43         | 4.84         | 4.33         | 4.54         | 4.86         | 4.60         | 4.65         | 4.88         |
| K2O            | 1.42         | 1.33         | 1.30         | 1.47         | 1.48         | 1.32          | 1.37         | 1.40         | 1.32         | 1.28          | 1.37          | 1.48         | 1.28         | 1.33         | 1.34         | 1.24         | 1.34         | 1.44         | 1.19         |
| Na2O           | 2.95         | 3.05         | 3.00         | 2.99         | 3.00         | 2.90          | 2.99         | 2.97         | 3.03         | 2.93          | 2.92          | 2.99         | 2.97         | 3.07         | 2.94         | 2.94         | 2.90         | 3.02         | 3.08         |
| P2O5           | <u>0.325</u> | <u>0.329</u> | <u>0.311</u> | <u>0.344</u> | <u>0.346</u> | <u>0.322</u>  | <u>0.351</u> | <u>0.317</u> | <u>0.344</u> | <u>0.323</u>  | <u>0.347</u>  | <u>0.363</u> | <u>0.319</u> | <u>0.369</u> | <u>0.328</u> | <u>0.313</u> | <u>0.331</u> | <u>0.334</u> | <u>0.319</u> |
|                | 100.00       | 100.00       | 100.00       | 100.00       | 100.00       | 100.00        | 100.00       | 100.00       | 100.00       | 100.00        | 100.00        | 100.00       | 100.00       | 100.00       | 100.00       | 100.00       | 100.00       | 100.00       | 100.00       |
| Unnormalized   |              |              |              |              |              |               |              |              |              |               |               |              |              |              |              |              |              |              |              |
| Ni             | 21           | 17           | 17           | 19           | 17           | 17            | 21           | 23           | 10           | 21            | 15            | 14           | 15           | 6            | 9            | 9            | 10           | 10           | 15.3         |
| Cr             | 42           | 41           | 42           | 37           | 39           | 40            | 37           | 42           | 40           | 41            | 38            | 36           | 39           | 36           | 39           | 37           | 39           | 38           | 38.9         |
| Sc             | 37           | 37           | 36           | 35           | 35           | 36            | 35           | 37           | 35           | 35            | 36            | 35           | 36           | 35           | 35           | 35           | 35           | 36           | 34           |
| V              | 308          | 308          | 310          | 302          | 299          | 310           | 301          | 315          | 300          | 309           | 299           | 300          | 310          | 302          | 302          | 309          | 304          | 318          | 304.4        |
| Ba             | 562          | 556          | 529          | <b>552</b>   | <b>572</b>   | 566           | 580          | 543          | 548          | 600           | 585           | 594          | 550          | 587          | 559          | 546          | 618          | 562          | 539.6        |
| Rb             | 33           | 31           | 31           | 34           | 35           | 32            | 33           | 31           | 33           | 33            | 32            | 34           | 32           | 32           | 32           | 31           | 30           | 33           | 25.3         |
| Sr             | 320          | 315          | 309          | 314          | 314          | 320           | 315          | 316          | 309          | 310           | 325           | 323          | 318          | 319          | 322          | 314          | 319          | 320          | 317.7        |
| Zr             | 162          | 162          | 155          | 162          | 165          | 160           | 163          | 159          | 161          | 156           | 167           | 170          | 160          | 169          | 161          | 157          | 160          | 167          | 163          |
| Y              | 34           | 35           | 33           | 35           | 34           | 35            | 33           | 33           | 32           | 33            | 36            | 35           | 34           | 36           | 34           | 32           | 32           | 34           | 33           |
| Nb             | 10.7         | 11.9         | 10.7         | 11.3         | 11.9         | 11.7          | 10.4         | 10.9         | 10.0         | 10.4          | 10.3          | 10.7         | 10.2         | 10.2         | 9.6          | 9.6          | 10.2         | 10.8         | 11.5         |
| Ga             | 21           | 22           | 21           | 20           | 20           | 21            | 22           | 22           | 20           | 20            | 20            | 20           | 19           | 19           | 19           | 20           | 20           | 21           | 19.6         |
| Cu             | 25           | 24           | 24           | 23           | 26           | 27            | 23           | 26           | 24           | 27            | 25            | 25           | 26           | 25           | 25           | 27           | 26           | 24           | 27.4         |
| Zn             | 112          | 116          | 112          | 116          | 119          | 115           | 117          | 117          | 116          | 117           | 118           | 121          | 112          | 119          | 116          | 116          | 121          | 122          | 120.9        |
| Pb             | 5            | 6            | 7            | 6            | 8            | 6             | 9            | 7            | 7            | 7             | 7             | 6            | 5            | 5            | 6            | 6            | 6            | 8            | 5.6          |
| La             | 20           | 21           | 17           | 22           | 23           | 22            | 23           | 22           | 24           | 21            | 21            | 23           | 21           | 24           | 19           | 23           | 24           | 24           | 19.1         |
| Ce             | 49           | 48           | 45           | 43           | 46           | 42            | 52           | 47           | 42           | 48            | 43            | 46           | 42           | 46           | 43           | 45           | 44           | 45           | 44.4         |
| Th             | 2            | 2            | 6            | 3            | 3            | 2             | 3            | 2            | 3            | 4             | 4             | 5            | 5            | 4            | 4            | 5            | 4            | 4            | 2.6          |
| Nd             | 26           | 29           | 26           | 25           | 26           | 23            | 28           | 24           | 23           | 26            | 26            | 27           | 21           | nd           | nd           | 25           | 25           | 26           | 24.9         |

Paul E. Hamr  
Table DR1.

|                |                 |                |
|----------------|-----------------|----------------|
| SN             |                 |                |
| WSU run        |                 |                |
| 7.5' Quad      |                 |                |
| UTM N*         |                 |                |
| UTM E*         |                 |                |
| Unnormalized   |                 |                |
| SiO2           |                 |                |
| Al2O3          |                 |                |
| TiO2           |                 |                |
| FeO            |                 |                |
| MnO            |                 |                |
| CaO            |                 |                |
| MgO            |                 |                |
| K2O            | MUSEUM-1        |                |
| Na2O           | 97              |                |
| P2O5           | <u>averages</u> | <u>std dev</u> |
| analysis total | 98.67           | 0.81           |

|       |       |       |
|-------|-------|-------|
| SiO2  | 54.68 | 0.32  |
| Al2O3 | 14.34 | 0.13  |
| TiO2  | 1.791 | 0.032 |
| FeO*  | 11.05 | 0.36  |
| MnO   | 0.200 | 0.008 |
| CaO   | 8.61  | 0.16  |
| MgO   | 4.67  | 0.23  |
| K2O   | 1.31  | 0.11  |
| Na2O  | 3.02  | 0.11  |
| P2O5  | 0.334 | 0.018 |

|              |      |     |
|--------------|------|-----|
| Unnormalized |      |     |
| Ni           | 12   | 5   |
| Cr           | 43   | 5   |
| Sc           | 36   | 4   |
| V            | 305  | 8   |
| Ba           | 556  | 52  |
| Rb           | 32   | 2   |
| Sr           | 315  | 6   |
| Zr           | 159  | 4   |
| Y            | 34   | 1   |
| Nb           | 11.8 | 1.2 |
| Ga           | 21   | 2   |
| Cu           | 24   | 4   |
| Zn           | 114  | 4   |
| Pb           | 6    | 2   |
| La           | 21   | 9   |
| Ce           | 41   | 13  |
| Th           | 4    | 2   |
| Nd           | 26   | 2   |

Table DR1 (continued). ANALYSES OF GRANDE RONDE BASALT LAVA FLOWS IN UPPER NACHES RIVER BASIN, YAKIMA AND KITTITAS COUNTIES, WASHINGTON

| STEMBER CREEK                           |              |              |              |              |              |              |               |               |               |               |              |               |               |              |              |               |              |              |               |               |
|-----------------------------------------|--------------|--------------|--------------|--------------|--------------|--------------|---------------|---------------|---------------|---------------|--------------|---------------|---------------|--------------|--------------|---------------|--------------|--------------|---------------|---------------|
| SN                                      | 95071        | 04048        | '04072       | 04114        | 04207        | '05067       | 05082         | 05083         | 05091         | 05109         | '05124       | 06002         | 06022         | 06031        | 06032        | 06089         | 06099        | 06107        | 06177         | 07026         |
| WSU run                                 | 0203(1)      | 0404(1)      | 0404(1)      | 0404(2)      | 0504(1)      | 0305(2)      | 0305(2)       | 0305(2)       | 0305(2)       | 0405(3)       | 0305(3)      | 0106(3)       | 0106(3)       | 0106(4)      | 0106(4)      | 0206          | 0206         | 0306(1)      | 0306(2)       | 0207          |
| 7.5' Quad                               | Nile         | Nile         | Nile         | Nile         | Nile         | Nile         | lanastash Lak | lanastash Lak | Weddle Canyon | Weddle Canyon | Nile         | Weddle Canyon | Weddle Canyon | Nile         | Nile         | lanastash Lak | Nile         | Nile         | Weddle Canyon | Weddle Canyon |
| UTM N*                                  | 5185620      | 5182760      | 5189860      | 5190800      | 5187860      | 5183500      | 5206680       | 5206680       | 5176650       | 5173670       | 5183100      | 5178160       | 5174250       | 5183560      | 5184360      | 5204980       | 5184560      | 5190280      | 5175440       | 5176040       |
| UTM E*                                  | 656670       | 657650       | 656460       | 658790       | 657630       | 657900       | 658250        | 658250        | 657660        | 659600        | 657146       | 660440        | 656130        | 657040       | 656900       | 656900        | 658220       | 657530       | 659420        | 656580        |
| Unnormalized Major Elements (Weight %): |              |              |              |              |              |              |               |               |               |               |              |               |               |              |              |               |              |              |               |               |
| SiO2                                    | 53.36        | 53.94        | 53.76        | 53.25        | 53.35        | 53.46        | 52.98         | 53.14         | 53.35         | 53.25         | 53.37        | 54.63         | 53.59         | 52.77        | 53.07        | 52.69         | 53.44        | 53.46        | 53.57         | 53.28         |
| Al2O3                                   | 14.11        | 14.39        | 14.31        | 14.17        | 1.757        | 14.16        | 14.06         | 14.14         | 14.27         | 14.17         | 14.07        | 14.79         | 14.29         | 14.15        | 14.21        | 14.10         | 14.23        | 14.24        | 14.18         | 14.24         |
| TiO2                                    | 1.784        | 1.801        | 1.780        | 1.773        | 14.17        | 1.775        | 1.736         | 1.740         | 1.720         | 1.798         | 1.776        | 1.863         | 1.804         | 1.725        | 1.766        | 1.749         | 1.782        | 1.746        | 1.785         | 1.785         |
| FeO                                     | 11.27        | 11.26        | 11.38        | 11.51        | 11.15        | 10.84        | 10.91         | 10.84         | 10.41         | 11.07         | 10.86        | 9.47          | 11.01         | 10.88        | 10.63        | 10.76         | 11.35        | 11.14        | 10.98         | 10.99         |
| MnO                                     | 0.204        | 0.202        | 0.203        | 0.204        | 0.198        | 0.195        | 0.200         | 0.198         | 0.197         | 0.199         | 0.196        | 0.171         | 0.204         | 0.195        | 0.195        | 0.196         | 0.199        | 0.201        | 0.198         | 0.199         |
| CaO                                     | 9.02         | 9.11         | 9.06         | 9.04         | 9.04         | 9.11         | 9.09          | 9.11          | 9.24          | 8.93          | 9.02         | 8.98          | 9.03          | 8.95         | 9.05         | 8.98          | 8.95         | 8.97         | 8.97          | 9.02          |
| MgO                                     | 5.28         | 5.24         | 5.29         | 5.26         | 8.94         | 4.91         | 5.24          | 5.19          | 5.27          | 5.18          | 4.92         | 4.84          | 5.11          | 5.30         | 5.04         | 5.16          | 5.16         | 5.29         | 5.11          | 5.27          |
| K2O                                     | 1.20         | 1.22         | 1.22         | 1.12         | 2.84         | 1.16         | 1.10          | 1.13          | 1.17          | 1.17          | 1.18         | 1.22          | 1.19          | 1.11         | 1.18         | 1.05          | 1.13         | 1.06         | 1.16          | 1.19          |
| Na2O                                    | 2.80         | 2.84         | 2.83         | 2.87         | 1.09         | 2.81         | 2.85          | 2.87          | 2.77          | 2.83          | 2.82         | 2.86          | 2.79          | 2.80         | 2.75         | 2.86          | 2.81         | 2.81         | 2.84          | 2.82          |
| P2O5                                    | <u>0.273</u> | <u>0.276</u> | <u>0.274</u> | <u>0.276</u> | <u>0.276</u> | <u>0.268</u> | <u>0.263</u>  | <u>0.261</u>  | <u>0.258</u>  | <u>0.287</u>  | <u>0.270</u> | <u>0.296</u>  | <u>0.271</u>  | <u>0.257</u> | <u>0.266</u> | <u>0.263</u>  | <u>0.270</u> | <u>0.278</u> | <u>0.272</u>  | <u>0.275</u>  |
| analysis tota                           | 99.31        | 100.27       | 100.10       | 99.47        | 98.95        | 98.62        | 98.43         | 98.63         | 98.65         | 98.88         | 98.48        | 99.12         | 99.29         | 98.14        | 98.16        | 97.82         | 99.31        | 99.19        | 99.06         | 99.07         |
| Normalized Major Elements (Weight %):   |              |              |              |              |              |              |               |               |               |               |              |               |               |              |              |               |              |              |               |               |
| SiO2                                    | 53.73        | 53.79        | 53.70        | 53.53        | 53.92        | 54.21        | 53.82         | 53.88         | 54.07         | 53.86         | 54.19        | 55.11         | 53.97         | 53.77        | 54.07        | 53.87         | 53.81        | 53.89        | 54.08         | 53.78         |
| Al2O3                                   | 14.21        | 14.35        | 14.30        | 14.24        | 14.32        | 14.36        | 14.29         | 14.34         | 14.46         | 14.33         | 14.29        | 14.92         | 14.39         | 14.42        | 14.48        | 14.42         | 14.33        | 14.36        | 14.31         | 14.37         |
| TiO2                                    | 1.796        | 1.796        | 1.778        | 1.782        | 1.775        | 1.799        | 1.764         | 1.765         | 1.743         | 1.819         | 1.803        | 1.880         | 1.817         | 1.758        | 1.799        | 1.788         | 1.795        | 1.760        | 1.802         | 1.802         |
| FeO*                                    | 11.35        | 11.23        | 11.37        | 11.57        | 11.27        | 10.99        | 11.09         | 10.99         | 10.55         | 11.19         | 11.03        | 9.56          | 11.09         | 11.08        | 10.83        | 11.00         | 11.43        | 11.23        | 11.08         | 11.09         |
| MnO                                     | 0.205        | 0.202        | 0.203        | 0.206        | 0.200        | 0.198        | 0.203         | 0.201         | 0.199         | 0.202         | 0.199        | 0.172         | 0.205         | 0.199        | 0.198        | 0.201         | 0.200        | 0.202        | 0.200         | 0.200         |
| CaO                                     | 9.08         | 9.08         | 9.05         | 9.09         | 9.04         | 9.17         | 9.23          | 9.24          | 9.36          | 9.03          | 9.16         | 9.06          | 9.09          | 9.12         | 9.21         | 9.18          | 9.01         | 9.04         | 9.05          | 9.10          |
| MgO                                     | 5.32         | 5.23         | 5.28         | 5.29         | 5.24         | 4.97         | 5.33          | 5.27          | 5.35          | 5.24          | 4.99         | 4.88          | 5.15          | 5.41         | 5.14         | 5.28          | 5.19         | 5.33         | 5.16          | 5.32          |
| K2O                                     | 1.21         | 1.22         | 1.21         | 1.13         | 1.10         | 1.18         | 1.11          | 1.14          | 1.19          | 1.18          | 1.20         | 1.23          | 1.20          | 1.13         | 1.20         | 1.07          | 1.13         | 1.07         | 1.17          | 1.20          |
| Na2O                                    | 2.82         | 2.83         | 2.83         | 2.89         | 2.87         | 2.85         | 2.90          | 2.91          | 2.81          | 2.86          | 2.86         | 2.89          | 2.81          | 2.85         | 2.80         | 2.92          | 2.83         | 2.83         | 2.87          | 2.85          |
| P2O5                                    | <u>0.275</u> | <u>0.276</u> | <u>0.274</u> | <u>0.278</u> | <u>0.279</u> | <u>0.272</u> | <u>0.267</u>  | <u>0.265</u>  | <u>0.262</u>  | <u>0.290</u>  | <u>0.274</u> | <u>0.299</u>  | <u>0.273</u>  | <u>0.262</u> | <u>0.271</u> | <u>0.269</u>  | <u>0.272</u> | <u>0.280</u> | <u>0.274</u>  | <u>0.278</u>  |
|                                         | 100.00       | 100.00       | 100.00       | 100.00       | 100.00       | 100.00       | 100.00        | 100.00        | 100.00        | 100.00        | 100.00       | 100.00        | 100.00        | 100.00       | 100.00       | 100.00        | 100.00       | 100.00       | 100.00        | 100.00        |
| Unnormalized Trace Elements (ppm):      |              |              |              |              |              |              |               |               |               |               |              |               |               |              |              |               |              |              |               |               |
| Ni                                      | 15           | 17           | 20           | 20           | 18           | 21           | 23            | 25            | 25            | 19            | 24           | 19            | 27            | 17           | 19           | 27            | 24           | 20           | 19            | 11            |
| Cr                                      | 55           | 46           | 48           | 47           | 51           | 50           | 54            | 53            | 54            | 49            | 50           | 52            | 56            | 52           | 51           | 51            | 52           | 51           | 47            | 50            |
| Sc                                      | 38           | 37           | 38           | 38           | 37           | 39           | 38            | 37            | 38            | 38            | 37           | 39            | 38            | 38           | 37           | 37            | 38           | 36           | 36            | 38            |
| V                                       | 323          | 330          | 324          | 326          | 322          | 331          | 322           | 324           | 324           | 321           | 330          | 312           | 330           | 327          | 326          | 322           | 330          | 318          | 323           | 327           |
| Ba                                      | 449          | 471          | 456          | 459          | 453          | 467          | 440           | 444           | 448           | 458           | 470          | 507           | 470           | 450          | 449          | 433           | 470          | 472          | 451           | 457           |
| Rb                                      | 26           | 28           | 28           | 28           | 26           | 27           | 25            | 25            | 25            | 26            | 27           | 26            | 26            | 25           | 24           | 25            | 26           | 24           | 26            | 26            |
| Sr                                      | 302          | 307          | 303          | 307          | 297          | 314          | 309           | 310           | 315           | 306           | 312          | 329           | 310           | 304          | 313          | 301           | 300          | 316          | 313           | 311           |
| Zr                                      | 148          | 150          | 149          | 148          | 140          | 153          | 149           | 151           | 146           | 155           | 154          | 158           | 152           | 143          | 148          | 145           | 148          | 148          | 153           | 155           |
| Y                                       | 32           | 31           | 31           | 31           | 32           | 33           | 31            | 32            | 32            | 34            | 34           | 32            | 31            | 30           | 31           | 32            | 33           | 33           | 32            | 32            |
| Nb                                      | 10.6         | 11.1         | 11.2         | 11.0         | 9.7          | 10.8         | 10.6          | 10.8          | 10.4          | 10.7          | 10.5         | 10.8          | 10.7          | 9.4          | 9.7          | 9.4           | 10.2         | 8.9          | 9.4           | 9.7           |
| Ga                                      | 22           | 21           | 21           | 22           | 19           | 21           | 20            | 20            | 20            | 20            | 20           | 21            | 21            | 21           | 21           | 20            | 20           | 21           | 22            | 19            |
| Cu                                      | 36           | 28           | 31           | 29           | 33           | 39           | 39            | 41            | 33            | 36            | 39           | 33            | 37            | 35           | 34           | 38            | 37           | 34           | 38            | 39            |
| Zn                                      | 111          | 111          | 111          | 109          | 108          | 108          | 107           | 109           | 106           | 115           | 108          | 123           | 116           | 109          | 110          | 111           | 110          | 113          | 112           | 113           |
| Pb                                      | 12           | 7            | 8            | 6            | 7            | 3            | 3             | 4             | 3             | 5             | 5            | 6             | 7             | 6            | 7            | 5             | 5            | 6            | 5             | 5             |
| La                                      | 14           | 18           | 15           | 19           | 21           | 16           | 18            | 19            | 16            | 24            | 19           | 21            | 20            | 19           | 17           | 18            | 19           | 20           | 19            | 19            |
| Ce                                      | 44           | 46           | 40           | 49           | 39           | 43           | 43            | 38            | 37            | 41            | 43           | 45            | 37            | 38           | 42           | 43            | 45           | 36           | 37            | 42            |
| Th                                      | 4            | 3            | 3            | 2            | 4            | 1            | 0             | 0             | 1             | 3             | 1            | 2             | 1             | 4            | 3            | 4             | 2            | 4            | 3             | 4             |
| Nd                                      |              | 23           | 22           | 27           | 23           | 23           | 23            | 21            | 19            | 21            | 24           | 26            | 21            | 22           | 25           | 27            | 24           | 22           | 21            |               |
| U                                       |              |              |              |              |              | 2            |               |               |               |               | 0            |               |               |              |              |               |              |              |               |               |

\*to nearest 5 m  
"†" denotes values >120% of highest standard.  
nd, not determined

Table DR1 (c

| SC            |              |              |                |                | upper McCOY CANYON |              |              |              |              | SF           |              |              |              |              | SF           |              |              |              |              | SF |  |  |  |  |
|---------------|--------------|--------------|----------------|----------------|--------------------|--------------|--------------|--------------|--------------|--------------|--------------|--------------|--------------|--------------|--------------|--------------|--------------|--------------|--------------|----|--|--|--|--|
| SN            | 07027        | 07092        |                |                | 93307              | 95074        | 95173        | 95174        | 96187        | 96190        | 96191        | 96193        | 96197        | 96199        | 96204        | 96271        | 96272        | 96280        | 97170        |    |  |  |  |  |
| WSU run       | 0207         | 0307         |                |                | 0695               | 0203(1)      | 0596         | 0800         | 0897         | 0202         | 0202         | 0202         | 0897(1)      | 0890         | 0897         | 0202         | 0197         | 0197         | 0202         |    |  |  |  |  |
| 7.5' Quad     | Veddle Canyo | Frost Mtn    |                |                | Mt. Clifty         | Nile         | Weeks Table  | Weeks Table  | Cliffdell    | Cliffdell    | Cliffdell    | Cliffdell    | Old Scab Mtn | Old Scab Mtn | Mt. Clifty   | Cliffdell    | Cliffdell    | Mt. Clifty   | Cliffdell    |    |  |  |  |  |
| UTM N*        | 5175840      | 5210260      |                |                | 5210210            | 5185220      | 5188190      | 5188190      | 5204810      | 5201150      | 5201150      | 5205230      | 5205950      | 5205850      | 5207230      | 5205315      | 5205390      | 5211510      | 5203200      |    |  |  |  |  |
| UTM E*        | 656260       | 657720       |                |                | 641380             | 656630       | 644120       | 644120       | 643760       | 646770       | 646770       | 644540       | 641690       | 641480       | 640840       | 644215       | 644620       | 637370       | 644030       |    |  |  |  |  |
| Unnormalize   |              |              |                |                |                    |              |              |              |              |              |              |              |              |              |              |              |              |              |              |    |  |  |  |  |
| SiO2          | 53.24        | 52.69        |                |                | 52.68              | 53.65        | 52.79        | 53.65        | 52.05        | 52.76        | 54.15        | 53.20        | 52.19        | 53.46        | 53.12        | 53.47        | 52.12        | 52.25        | 53.71        |    |  |  |  |  |
| Al2O3         | 14.34        | 14.07        |                |                | 13.80              | 14.02        | 13.87        | 13.91        | 13.64        | 14.16        | 14.12        | 13.92        | 13.79        | 13.83        | 14.05        | 13.99        | 13.61        | 13.73        | 13.95        |    |  |  |  |  |
| TiO2          | 1.760        | 1.771        |                |                | 1.805              | 1.827        | 1.754        | 1.814        | 1.747        | 1.848        | 1.825        | 1.825        | 1.683        | 1.810        | 1.699        | 1.822        | 1.787        | 1.663        | 1.825        |    |  |  |  |  |
| FeO           | 10.76        | 10.73        |                |                | 11.27              | 11.17        | 11.31        | 11.46        | 11.46        | 10.74        | 10.61        | 11.36        | 10.98        | 11.57        | 10.68        | 11.60        | 11.39        | 10.42        | 11.23        |    |  |  |  |  |
| MnO           | 0.192        | 0.198        |                |                | 0.203              | 0.203        | 0.199        | 0.203        | 0.201        | 0.218        | 0.200        | 0.210        | 0.200        | 0.204        | 0.211        | 0.207        | 0.193        | 0.190        | 0.202        |    |  |  |  |  |
| CaO           | 9.13         | 8.94         |                |                | 8.59               | 8.80         | 8.48         | 8.79         | 8.45         | 9.23         | 8.53         | 8.84         | 8.43         | 8.76         | 8.42         | 8.81         | 8.52         | 8.26         | 8.85         |    |  |  |  |  |
| MgO           | 5.23         | 4.92         |                |                | 4.69               | 4.99         | 5.17         | 4.91         | 5.15         | 4.43         | 4.73         | 5.08         | 5.05         | 4.85         | 5.34         | 5.21         | 4.84         | 5.14         | 4.92         |    |  |  |  |  |
| K2O           | 1.18         | 1.13         | STEMBER CREEK  |                | 1.02               | 1.23         | 1.14         | 1.18         | 1.15         | 1.20         | 1.22         | 1.18         | 1.20         | 1.19         | 1.24         | 1.10         | 1.03         | 1.12         | 1.17         |    |  |  |  |  |
| Na2O          | 2.87         | 2.80         | 22             |                | 3.23               | 2.86         | 3.36         | 2.93         | 2.82         | 2.99         | 3.09         | 2.95         | 2.77         | 2.89         | 2.78         | 3.05         | 3.12         | 2.94         | 2.94         |    |  |  |  |  |
| P2O5          | <u>0.267</u> | <u>0.273</u> | <u>average</u> | <u>std dev</u> | <u>0.324</u>       | <u>0.327</u> | <u>0.316</u> | <u>0.330</u> | <u>0.320</u> | <u>0.328</u> | <u>0.361</u> | <u>0.329</u> | <u>0.298</u> | <u>0.323</u> | <u>0.306</u> | <u>0.326</u> | <u>0.321</u> | <u>0.300</u> | <u>0.323</u> |    |  |  |  |  |
| analysis tota | 98.97        | 97.53        | 98.88          | 0.66           | 97.61              | 99.07        | 98.39        | 99.18        | 96.98        | 97.90        | 98.84        | 98.89        | 96.60        | 98.89        | 97.85        | 99.58        | 96.93        | 96.01        | 99.12        |    |  |  |  |  |
| Normalized I  |              |              |                |                |                    |              |              |              |              |              |              |              |              |              |              |              |              |              |              |    |  |  |  |  |
| SiO2          | 53.79        | 54.02        | 53.95          | 0.31           | 53.97              | 54.15        | 53.65        | 54.10        | 53.67        | 53.89        | 54.79        | 53.80        | 54.03        | 54.06        | 54.29        | 53.69        | 53.77        | 54.42        | 54.19        |    |  |  |  |  |
| Al2O3         | 14.49        | 14.42        | 14.38          | 0.14           | 14.14              | 14.15        | 14.10        | 14.03        | 14.06        | 14.46        | 14.29        | 14.08        | 14.28        | 13.99        | 14.36        | 14.05        | 14.04        | 14.30        | 14.07        |    |  |  |  |  |
| TiO2          | 1.778        | 1.816        | 1.792          | 0.028          | 1.849              | 1.844        | 1.783        | 1.829        | 1.801        | 1.888        | 1.846        | 1.845        | 1.742        | 1.830        | 1.736        | 1.830        | 1.844        | 1.732        | 1.841        |    |  |  |  |  |
| FeO*          | 10.87        | 11.01        | 11.04          | 0.41           | 11.55              | 11.27        | 11.50        | 11.55        | 11.81        | 10.97        | 10.74        | 11.48        | 11.37        | 11.70        | 10.92        | 11.65        | 11.75        | 10.85        | 11.33        |    |  |  |  |  |
| MnO           | 0.194        | 0.203        | 0.200          | 0.007          | 0.208              | 0.205        | 0.202        | 0.205        | 0.207        | 0.223        | 0.202        | 0.212        | 0.207        | 0.206        | 0.216        | 0.208        | 0.199        | 0.198        | 0.204        |    |  |  |  |  |
| CaO           | 9.23         | 9.17         | 9.13           | 0.09           | 8.80               | 8.88         | 8.62         | 8.86         | 8.71         | 9.43         | 8.63         | 8.94         | 8.73         | 8.86         | 8.61         | 8.85         | 8.79         | 8.60         | 8.93         |    |  |  |  |  |
| MgO           | 5.28         | 5.04         | 5.21           | 0.13           | 4.80               | 5.04         | 5.25         | 4.95         | 5.31         | 4.53         | 4.79         | 5.14         | 5.23         | 4.90         | 5.46         | 5.23         | 4.99         | 5.35         | 4.96         |    |  |  |  |  |
| K2O           | 1.19         | 1.16         | 1.16           | 0.05           | 1.04               | 1.24         | 1.16         | 1.19         | 1.19         | 1.23         | 1.23         | 1.19         | 1.24         | 1.20         | 1.27         | 1.10         | 1.06         | 1.17         | 1.18         |    |  |  |  |  |
| Na2O          | 2.90         | 2.88         | 2.86           | 0.04           | 3.31               | 2.89         | 3.42         | 2.95         | 2.91         | 3.05         | 3.13         | 2.98         | 2.87         | 2.92         | 2.84         | 3.06         | 3.22         | 3.06         | 2.97         |    |  |  |  |  |
| P2O5          | <u>0.270</u> | <u>0.280</u> | 0.275          | 0.009          | <u>0.332</u>       | <u>0.330</u> | <u>0.321</u> | <u>0.333</u> | <u>0.330</u> | <u>0.335</u> | <u>0.365</u> | <u>0.333</u> | <u>0.309</u> | <u>0.327</u> | <u>0.313</u> | <u>0.327</u> | <u>0.331</u> | <u>0.312</u> | <u>0.326</u> |    |  |  |  |  |
|               | 100.00       | 100.00       |                |                | 100.00             | 100.00       | 100.00       | 100.00       | 100.00       | 100.00       | 100.00       | 100.00       | 100.00       | 100.00       | 100.00       | 100.00       | 100.00       | 100.00       | 100.00       |    |  |  |  |  |
| Unnormalize   |              |              |                |                |                    |              |              |              |              |              |              |              |              |              |              |              |              |              |              |    |  |  |  |  |
| Ni            | 15           | 14           | 20             | 4              | 4                  | 14           | 10           | 14           | 5            | 10           | 11           | 13           | 5            | 11           | 6            | 12           | 3            | 4            | 12           |    |  |  |  |  |
| Cr            | 50           | 47           | 51             | 3              | 44                 | 48           | 43           | 55           | 48           | 52           | 45           | 52           | 48           | 52           | 48           | 52           | 48           | 40           | 54           |    |  |  |  |  |
| Sc            | 37           | 36           | 38             | 1              | 34                 | 38           | 50           | 40           | 35           | 42           | 36           | 38           | 31           | 35           | 33           | 34           | 30           | 29           | 42           |    |  |  |  |  |
| V             | 325          | 322          | 324            | 4              | 291                | 314          | 301          | 309          | 306          | 323          | 300          | 299          | 302          | 309          | 319          | 298          | 308          | 289          | 296          |    |  |  |  |  |
| Ba            | 461          | 444          | 458            | 16             | 446                | 482          | 537          | 477          | 480          | 520          | 573          | 480          | 557          | 488          | 529          | 480          | 499          | 538          | 481          |    |  |  |  |  |
| Rb            | 25           | 25           | 26             | 1              | 27                 | 27           | 26           | 28           | 28           | 30           | 26           | 28           | 31           | 28           | 33           | 25           | 27           | 30           | 29           |    |  |  |  |  |
| Sr            | 317          | 312          | 309            | 7              | 313                | 306          | 299          | 307          | 303          | 316          | 311          | 306          | 309          | 305          | 307          | 304          | 303          | 304          | 308          |    |  |  |  |  |
| Zr            | 153          | 150          | 150            | 4              | 154                | 154          | 149          | 153          | 151          | 154          | 163          | 155          | 153          | 153          | 153          | 155          | 153          | 150          | 153          |    |  |  |  |  |
| Y             | 32           | 31           | 32             | 1              | 34                 | 35           | 33           | 35           | 33           | 34           | 36           | 34           | 33           | 35           | 32           | 34           | 34           | 32           | 34           |    |  |  |  |  |
| Nb            | 9.1          | 9.0          | 10.2           | 0.7            | 13.3               | 10.1         | 13.8         | 11.0         | 12.6         | 11.1         | 12.1         | 11.0         | 13.1         | 12.1         | 11.9         | 11.4         | 11.7         | 10.4         | 11.4         |    |  |  |  |  |
| Ga            | 19           | 19           | 20             | 1              | 21                 | 22           | 20           | 20           | 20           | 22           | 21           | 19           | 21           | 20           | 21           | 22           | 23           | 19           | 19           |    |  |  |  |  |
| Cu            | 34           | 39           | 36             | 3              | 31                 | 33           | 26           | 32           | 24           | 34           | 25           | 34           | 23           | 34           | 23           | 35           | 26           | 14           | 36           |    |  |  |  |  |
| Zn            | 112          | 111          | 111            | 4              | 108                | 114          | 108          | 114          | 108          | 112          | 118          | 115          | 107          | 111          | 106          | 111          | 115          | 110          | 115          |    |  |  |  |  |
| Pb            | 5            | 5            | 6              | 2              | 4                  | 14           | 1            | 7            | 3            | 8            | 7            | 8            | 6            | 5            | 8            | 6            | 6            | 5            | 4            |    |  |  |  |  |
| La            | 18           | 22           | 19             | 2              | 26                 | 5            | 21           | 18           | 22           | 23           | 4            | 20           | 8            | 13           | 23           | 23           | 25           | 17           | 9            |    |  |  |  |  |
| Ce            | 45           | 40           | 41             | 4              | 33                 | 51           | 0            | 48           | 49           | 31           | 48           | 47           | 39           | 32           | 52           | 41           | 35           | 47           | 45           |    |  |  |  |  |
| Th            | 3            | 4            | 2              | 1              | 4                  | 3            | 4            | 4            | 3            | 4            | 5            | 3            | 5            | 8            | 5            | 3            | 1            | 4            | 2            |    |  |  |  |  |
| Nd            |              | 23           | 23             | 2              |                    |              |              |              |              |              |              |              |              |              |              |              |              |              |              |    |  |  |  |  |
| U             |              | 1            |                |                |                    |              |              |              |              |              |              |              |              |              |              |              |              |              |              |    |  |  |  |  |

Table DR1 (c

|               |              |              |              |              |              |              |              |              |              |              |              |              |              | SF           |              |              |              |              |              |              |
|---------------|--------------|--------------|--------------|--------------|--------------|--------------|--------------|--------------|--------------|--------------|--------------|--------------|--------------|--------------|--------------|--------------|--------------|--------------|--------------|--------------|
| SN            | 99024        | 99031        | 99063        | 99159        | 99163        | 01207        | 01208        | 01214        | 02011        | 02013        | 02014        | 02074        | 02076        | '02087       | 02101        | 02113        | 02119        | 02134        | 02140        | 02148        |
| WSU run       | 0799         | 0799         | 0799         | 0300         | 0300         | 0202         | 0202         | 0202         | 0402         | 0106         | 0106         | 0402         | 0402         | 0402         | 0402         | 0402         | 0402         | 0402         | 0402         | 0402         |
| 7.5' Quad     | Cliffdell    | Cliffdell    | Quartz Mtn   | Meeks Table  | Nile         | Cliffdell    | Cliffdell    | Cliffdell    | Cliffdell    | Cliffdell    | Cliffdell    | Old Scab Mtn | Old Scab Mtn | Meeks Table  | Imberwolf Mt | Old Scab Mtn | Old Scab Mtn | Mt. Clifty   | Tieton Basin | Old Scab Mtn |
| UTM N*        | 5204650      | 5303100      | 5207830      | 5182130      | 5183530      | 5205660      | 5204990      | 5202730      | 5204220      | 5204480      | 5204880      | 5196060      | 5195220      | 5186030      | 5188890      | 5193320      | 5204920      | 5208580      | 5175150      | 5191190      |
| UTM E*        | 6455570      | 647630       | 650900       | 651370       | 654230       | 644800       | 645180       | 645730       | 643800       | 644270       | 644500       | 642580       | 641820       | 648890       | 642080       | 641640       | 639590       | 637980       | 644520       | 642290       |
| Unnormalize   |              |              |              |              |              |              |              |              |              |              |              |              |              |              |              |              |              |              |              |              |
| SiO2          | 53.50        | 54.09        | 53.39        | 53.30        | 53.65        | 53.37        | 53.36        | 53.40        | 53.54        | 53.04        | 53.10        | 53.68        | 53.97        | 54.27        | 53.98        | 53.70        | 53.63        | 53.39        | 53.62        | 53.60        |
| Al2O3         | 14.11        | 14.17        | 13.89        | 13.95        | 13.99        | 13.96        | 13.96        | 13.89        | 14.05        | 13.96        | 13.92        | 14.03        | 14.15        | 14.26        | 14.17        | 14.01        | 14.06        | 13.92        | 14.49        | 14.01        |
| TiO2          | 1.816        | 1.839        | 1.819        | 1.807        | 1.823        | 1.837        | 1.840        | 1.817        | 1.797        | 1.799        | 1.795        | 1.821        | 1.844        | 1.891        | 1.840        | 1.831        | 1.844        | 1.822        | 1.836        | 1.802        |
| FeO           | 11.36        | 11.22        | 11.41        | 11.68        | 11.53        | 11.32        | 11.27        | 11.36        | 11.50        | 11.13        | 11.27        | 10.82        | 11.05        | 10.43        | 10.96        | 11.11        | 11.21        | 11.73        | 10.85        | 11.74        |
| MnO           | 0.208        | 0.212        | 0.188        | 0.204        | 0.202        | 0.209        | 0.213        | 0.197        | 0.206        | 0.200        | 0.205        | 0.205        | 0.202        | 0.201        | 0.203        | 0.205        | 0.206        | 0.217        | 0.200        | 0.203        |
| CaO           | 8.78         | 8.82         | 8.55         | 8.78         | 8.78         | 8.81         | 8.79         | 8.66         | 8.82         | 8.62         | 8.59         | 8.83         | 8.84         | 8.92         | 8.87         | 8.81         | 8.79         | 8.79         | 9.11         | 8.78         |
| MgO           | 5.07         | 4.83         | 5.16         | 4.96         | 4.98         | 5.15         | 5.15         | 5.07         | 4.92         | 4.79         | 4.94         | 5.01         | 4.90         | 4.81         | 4.80         | 4.96         | 4.97         | 4.82         | 4.97         | 4.98         |
| K2O           | 1.14         | 1.25         | 1.11         | 1.12         | 1.26         | 1.12         | 1.14         | 1.11         | 1.22         | 1.21         | 1.15         | 1.22         | 1.24         | 1.09         | 1.20         | 1.17         | 1.23         | 1.15         | 1.13         | 1.19         |
| Na2O          | 3.01         | 2.96         | 3.06         | 2.93         | 2.84         | 2.88         | 2.87         | 3.01         | 2.84         | 2.86         | 2.87         | 2.86         | 2.86         | 3.02         | 2.81         | 2.88         | 2.87         | 2.89         | 2.87         | 2.84         |
| P2O5          | <u>0.323</u> | <u>0.334</u> | <u>0.324</u> | <u>0.322</u> | <u>0.326</u> | <u>0.324</u> | <u>0.331</u> | <u>0.329</u> | <u>0.324</u> | <u>0.323</u> | <u>0.317</u> | <u>0.323</u> | <u>0.326</u> | <u>0.342</u> | <u>0.331</u> | <u>0.325</u> | <u>0.329</u> | <u>0.324</u> | <u>0.326</u> | <u>0.329</u> |
| analysis tota | 99.31        | 99.73        | 98.90        | 99.05        | 99.38        | 98.98        | 98.93        | 98.84        | 99.21        | 97.94        | 98.15        | 98.80        | 99.39        | 99.24        | 99.16        | 99.00        | 99.14        | 99.06        | 99.40        | 99.48        |
| Normalized I  |              |              |              |              |              |              |              |              |              |              |              |              |              |              |              |              |              |              |              |              |
| SiO2          | 53.87        | 54.24        | 53.99        | 53.81        | 53.99        | 53.92        | 53.94        | 54.03        | 53.97        | 54.15        | 54.10        | 54.33        | 54.30        | 54.69        | 54.44        | 54.24        | 54.10        | 53.90        | 53.94        | 53.88        |
| Al2O3         | 14.21        | 14.21        | 14.04        | 14.08        | 14.08        | 14.10        | 14.11        | 14.05        | 14.16        | 14.25        | 14.18        | 14.20        | 14.24        | 14.37        | 14.29        | 14.15        | 14.18        | 14.05        | 14.58        | 14.08        |
| TiO2          | 1.829        | 1.844        | 1.839        | 1.824        | 1.834        | 1.856        | 1.860        | 1.838        | 1.811        | 1.837        | 1.829        | 1.843        | 1.855        | 1.906        | 1.856        | 1.850        | 1.860        | 1.839        | 1.847        | 1.811        |
| FeO*          | 11.43        | 11.25        | 11.53        | 11.79        | 11.60        | 11.44        | 11.40        | 11.49        | 11.59        | 11.37        | 11.48        | 10.95        | 11.12        | 10.51        | 11.05        | 11.22        | 11.31        | 11.85        | 10.91        | 11.80        |
| MnO           | 0.209        | 0.213        | 0.190        | 0.206        | 0.203        | 0.211        | 0.215        | 0.199        | 0.208        | 0.204        | 0.208        | 0.207        | 0.203        | 0.203        | 0.205        | 0.207        | 0.208        | 0.219        | 0.201        | 0.204        |
| CaO           | 8.84         | 8.84         | 8.65         | 8.86         | 8.83         | 8.90         | 8.89         | 8.76         | 8.89         | 8.80         | 8.75         | 8.94         | 8.89         | 8.99         | 8.94         | 8.90         | 8.87         | 8.87         | 9.17         | 8.83         |
| MgO           | 5.11         | 4.84         | 5.22         | 5.01         | 5.01         | 5.20         | 5.21         | 5.13         | 4.96         | 4.89         | 5.03         | 5.07         | 4.93         | 4.85         | 4.84         | 5.01         | 5.01         | 4.87         | 5.00         | 5.01         |
| K2O           | 1.15         | 1.25         | 1.12         | 1.13         | 1.27         | 1.13         | 1.15         | 1.12         | 1.23         | 1.24         | 1.17         | 1.23         | 1.25         | 1.10         | 1.21         | 1.18         | 1.24         | 1.16         | 1.14         | 1.20         |
| Na2O          | 3.03         | 2.97         | 3.09         | 2.96         | 2.86         | 2.91         | 2.90         | 3.05         | 2.86         | 2.92         | 2.93         | 2.89         | 2.88         | 3.04         | 2.83         | 2.91         | 2.89         | 2.92         | 2.89         | 2.85         |
| P2O5          | <u>0.325</u> | <u>0.335</u> | <u>0.328</u> | <u>0.325</u> | <u>0.328</u> | <u>0.327</u> | <u>0.335</u> | <u>0.333</u> | <u>0.327</u> | <u>0.330</u> | <u>0.323</u> | <u>0.327</u> | <u>0.328</u> | <u>0.345</u> | <u>0.334</u> | <u>0.328</u> | <u>0.332</u> | <u>0.327</u> | <u>0.328</u> | <u>0.331</u> |
|               | 100.00       | 100.00       | 100.00       | 100.00       | 100.00       | 100.00       | 100.00       | 100.00       | 100.00       | 100.00       | 100.00       | 100.00       | 100.00       | 100.00       | 100.00       | 100.00       | 100.00       | 100.00       | 100.00       | 100.00       |
| Unnormalize   |              |              |              |              |              |              |              |              |              |              |              |              |              |              |              |              |              |              |              |              |
| Ni            | 12           | 12           | 12           | 10           | 12           | 12           | 16           | 12           | 13           | 30           | 31           | 14           | 11           | 13           | 11           | 14           | 13           | 13           | 14           | 11           |
| Cr            | 56           | 52           | 55           | 51           | 52           | 52           | 53           | 54           | 51           | 45           | 46           | 53           | 52           | <b>53</b>    | 53           | 52           | 51           | 49           | 55           | 52           |
| Sc            | 31           | 41           | 30           | 39           | 32           | 37           | 45           | 35           | 42           | 35           | 36           | 40           | 41           | 28           | 42           | 33           | 32           | 41           | 40           | 38           |
| V             | 301          | 305          | 287          | 302          | 304          | 296          | 303          | 298          | 303          | 304          | 307          | 299          | 305          | 312          | 311          | 302          | 310          | 299          | 304          | 293          |
| Ba            | 453          | 474          | 486          | 461          | 483          | 477          | 470          | 468          | 474          | 478          | 468          | 468          | 487          | 503          | <b>517</b>   | 487          | 496          | 477          | 480          | 488          |
| Rb            | 26           | 27           | 29           | 26           | 28           | 28           | 28           | 24           | 28           | 28           | 26           | 28           | 29           | 24           | 27           | 28           | 29           | 29           | 23           | 28           |
| Sr            | 304          | 306          | 298          | 308          | 307          | 299          | 303          | 301          | 309          | 301          | 299          | 301          | 305          | 316          | 313          | 303          | 305          | 307          | 319          | 309          |
| Zr            | 152          | 155          | 153          | 154          | 153          | 154          | 152          | 153          | 156          | 151          | 152          | 151          | 155          | 158          | 155          | 153          | 153          | 156          | 154          | 156          |
| Y             | 35           | 35           | 33           | 33           | 34           | 34           | 34           | 34           | 35           | 31           | 32           | 33           | 34           | 36           | 36           | 33           | 33           | 34           | 34           | 34           |
| Nb            | 12.3         | 11.8         | 12.8         | 12.3         | 12.0         | 13.3         | 11.8         | 12.3         | 12.0         | 9.2          | 9.8          | 10.6         | 12.2         | 10.6         | 11.3         | 12.0         | 12.3         | 12.2         | 12.7         | 11.5         |
| Ga            | 22           | 22           | 21           | 20           | 22           | 18           | 22           | 19           | 21           | 20           | 22           | 22           | 21           | 19           | 21           | 19           | 18           | 21           | 21           | 24           |
| Cu            | 35           | 33           | 34           | 33           | 32           | 36           | 30           | 32           | 36           | 33           | 33           | 36           | 35           | 35           | 34           | 33           | 35           | 36           | 33           | 33           |
| Zn            | 108          | 111          | 109          | 114          | 115          | 116          | 111          | 113          | 115          | 116          | 113          | 111          | 114          | 114          | 114          | 114          | 114          | 115          | 115          | 114          |
| Pb            | 3            | 5            | 8            | 7            | 3            | 5            | 5            | 1            | 3            | 6            | 6            | 5            | 7            | 4            | 6            | 4            | 5            | 6            | 6            | 8            |
| La            | 22           | 26           | 17           | 9            | 22           | 20           | 13           | 19           | 24           | 19           | 19           | 16           | 19           | 27           | 24           | 25           | 14           | 15           | 29           | 13           |
| Ce            | 29           | 38           | 34           | 35           | 44           | 44           | 31           | 25           | 55           | 39           | 41           | 51           | 25           | 27           | 44           | 32           | 41           | 33           | 56           | 49           |
| Th            | 3            | 2            | 6            | 3            | 6            | 5            | 3            | 0            | 2            | 3            | 3            | 3            | 4            | 5            | 5            | 6            | 6            | 5            | 1            | 1            |
| Nd            |              |              |              |              |              |              |              |              |              | 24           |              |              |              |              |              |              |              |              |              |              |
| U             |              |              |              |              |              |              |              |              |              |              |              |              |              |              |              |              |              |              |              |              |

Page 4

Table DR1 (c

| SN                                 | 04200        | 04201        | 04211        | 04212                                 | 04213        | 04214        | 05025        | 05026        | 05032        | 05033        | 05035        | 05037        | 05038        | '05064       | '05065       | '05066       | '05072       | '05084       | 05089        | 05090        |
|------------------------------------|--------------|--------------|--------------|---------------------------------------|--------------|--------------|--------------|--------------|--------------|--------------|--------------|--------------|--------------|--------------|--------------|--------------|--------------|--------------|--------------|--------------|
| WSU run                            | 0504(1)      | 0504(1)      | 0504(1)      | 0504(1)                               | 0405(4)      | 0504(2)      | 0305(1)      | 0305(1)      | 0305(1)?     | 0305(1)      | 0305(1)      | 0305(1)      | 0405(3)      | 0305(2)      | 0305(2)      | %0305(4)     | 0305(2)      | 0305(2)      | 0405(4)      | 0405(3)      |
| 7.5' Quad                          | Mt. Clifty   | Ianastash La | Ianastash La | Ianastash La                          | Ianastash La | Ianastash La | Tieton Basin | Tieton Basin | /eddle Canyo | /eddle Canyo | Tieton Basin | /eddle Canyo | /eddle Canyo | Nile         | Nile         | Nile         | Nile         | Nile         | /eddle Canyo | /eddle Canyo |
| UTM N*                             | 5208820      | 5193540      | 5193180      | 5194270                               | 5194270      | 5196880      | 5174280      | 5175660      | 5178260      | 5178220      | 5175910      | 5174840      | 5174440      | 5184000      | 5183800      | 5183720      | 5184220      | 5189770      | 5176920      | 5176670      |
| UTM E*                             | 635640       | 653370       | 656710       | 657750                                | 657750       | 657260       | 650160       | 650940       | 656750       | 656880       | 652050       | 654490       | 654120       | 657900       | 657880       | 657860       | 656760       | 657520       | 653640       | 653680       |
| Unnormalize                        |              |              |              |                                       |              |              |              |              |              |              |              |              |              |              |              |              |              |              |              |              |
| SiO2                               | 53.69        | 53.97        | 53.47        | 53.52                                 | 53.10        | 53.18        | 53.65        | 53.14        | 53.66        | 53.80        | 54.05        | 53.52        | 53.23        | 53.47        | 53.30        | 54.05        | 53.36        | 53.39        | 53.14        | 53.12        |
| Al2O3                              | 14.10        | 14.36        | 13.99        | 14.00                                 | 13.96        | 14.01        | 13.98        | 13.91        | 14.04        | 13.98        | 14.64        | 14.07        | 13.97        | 14.07        | 13.87        | 14.03        | 13.85        | 13.94        | 13.95        | 14.00        |
| TiO2                               | 1.818        | 1.840        | 1.815        | 1.814                                 | 1.796        | 1.805        | 1.812        | 1.810        | 1.817        | 1.830        | 1.880        | 1.843        | 1.807        | 1.842        | 1.805        | 1.844        | 1.802        | 1.806        | 1.814        | 1.808        |
| FeO                                | 11.26        | 10.82        | 11.54        | 11.36                                 | 10.99        | 11.02        | 11.29        | 11.41        | 11.21        | 11.34        | 10.21        | 11.27        | 11.20        | 10.74        | 10.90        | 11.17        | 11.24        | 10.92        | 11.55        | 10.81        |
| MnO                                | 0.201        | 0.233        | 0.202        | 0.201                                 | 0.202        | 0.204        | 0.201        | 0.200        | 0.203        | 0.201        | 0.194        | 0.206        | 0.202        | 0.200        | 0.203        | 0.200        | 0.204        | 0.205        | 0.213        | 0.198        |
| CaO                                | 8.71         | 8.85         | 8.67         | 8.67                                  | 8.64         | 8.72         | 8.82         | 8.86         | 8.83         | 8.71         | 9.15         | 8.83         | 8.61         | 8.81         | 8.65         | 8.82         | 8.69         | 8.77         | 8.57         | 8.63         |
| MgO                                | 4.87         | 4.68         | 4.97         | 4.94                                  | 4.94         | 4.75         | 4.70         | 4.66         | 4.68         | 4.79         | 4.46         | 4.94         | 4.97         | 4.35         | 4.61         | 4.55         | 4.87         | 4.88         | 4.68         | 4.87         |
| K2O                                | 1.13         | 1.27         | 1.14         | 1.20                                  | 1.17         | 1.20         | 1.28         | 1.13         | 1.30         | 1.23         | 1.19         | 1.17         | 1.23         | 1.28         | 1.21         | 1.21         | 1.31         | 1.20         | 1.10         | 1.25         |
| Na2O                               | 2.97         | 2.90         | 2.93         | 2.93                                  | 2.94         | 2.88         | 2.84         | 2.90         | 2.88         | 2.84         | 2.96         | 2.96         | 2.92         | 2.84         | 2.79         | 2.78         | 2.84         | 2.91         | 2.67         | 2.89         |
| P2O5                               | <u>0.334</u> | <u>0.323</u> | <u>0.332</u> | <u>0.332</u>                          | <u>0.317</u> | <u>0.321</u> | <u>0.326</u> | <u>0.319</u> | <u>0.328</u> | <u>0.328</u> | <u>0.329</u> | <u>0.331</u> | <u>0.321</u> | <u>0.333</u> | <u>0.325</u> | <u>0.339</u> | <u>0.324</u> | <u>0.322</u> | <u>0.325</u> | <u>0.319</u> |
| analysis tota                      | 99.08        | 99.23        | 99.06        | 98.97                                 | 98.04        | 98.09        | 98.90        | 98.33        | 98.95        | 99.04        | 99.06        | 99.14        | 98.44        | 97.94        | 97.65        | 99.00        | 98.48        | 98.36        | 98.00        | 97.91        |
| Normalized I                       |              |              |              | Normalized Major Elements (Weight %): |              |              |              |              |              |              |              |              |              |              |              |              |              |              |              |              |
| SiO2                               | 54.18        | 54.38        | 53.98        | 54.08                                 | 54.15        | 54.22        | 54.25        | 54.04        | 54.23        | 54.32        | 54.56        | 53.98        | 54.07        | 54.60        | 54.58        | 54.59        | 54.18        | 54.28        | 54.22        | 54.26        |
| Al2O3                              | 14.23        | 14.47        | 14.12        | 14.14                                 | 14.23        | 14.28        | 14.14        | 14.15        | 14.19        | 14.11        | 14.78        | 14.20        | 14.19        | 14.37        | 14.20        | 14.17        | 14.06        | 14.17        | 14.23        | 14.30        |
| TiO2                               | 1.834        | 1.855        | 1.832        | 1.833                                 | 1.832        | 1.840        | 1.832        | 1.841        | 1.837        | 1.847        | 1.898        | 1.859        | 1.835        | 1.880        | 1.849        | 1.862        | 1.830        | 1.836        | 1.851        | 1.847        |
| FeO*                               | 11.37        | 10.90        | 11.65        | 11.48                                 | 11.21        | 11.23        | 11.42        | 11.61        | 11.33        | 11.45        | 10.30        | 11.37        | 11.37        | 10.96        | 11.16        | 11.28        | 11.41        | 11.10        | 11.78        | 11.04        |
| MnO                                | 0.203        | 0.235        | 0.204        | 0.203                                 | 0.206        | 0.208        | 0.203        | 0.203        | 0.205        | 0.203        | 0.196        | 0.208        | 0.206        | 0.204        | 0.208        | 0.202        | 0.207        | 0.208        | 0.217        | 0.202        |
| CaO                                | 8.79         | 8.92         | 8.75         | 8.76                                  | 8.81         | 8.89         | 8.92         | 9.01         | 8.92         | 8.79         | 9.24         | 8.91         | 8.74         | 9.00         | 8.86         | 8.91         | 8.83         | 8.92         | 8.75         | 8.82         |
| MgO                                | 4.92         | 4.71         | 5.01         | 4.99                                  | 5.04         | 4.85         | 4.75         | 4.74         | 4.73         | 4.83         | 4.50         | 4.98         | 5.05         | 4.45         | 4.72         | 4.60         | 4.94         | 4.96         | 4.77         | 4.97         |
| K2O                                | 1.14         | 1.28         | 1.16         | 1.21                                  | 1.19         | 1.22         | 1.29         | 1.14         | 1.31         | 1.24         | 1.21         | 1.18         | 1.25         | 1.30         | 1.24         | 1.22         | 1.33         | 1.22         | 1.12         | 1.28         |
| Na2O                               | 3.00         | 2.92         | 2.95         | 2.96                                  | 3.00         | 2.93         | 2.87         | 2.95         | 2.91         | 2.87         | 2.99         | 2.99         | 2.97         | 2.90         | 2.85         | 2.81         | 2.88         | 2.96         | 2.72         | 2.96         |
| P2O5                               | <u>0.337</u> | <u>0.325</u> | <u>0.335</u> | <u>0.336</u>                          | <u>0.323</u> | <u>0.327</u> | <u>0.330</u> | <u>0.324</u> | <u>0.331</u> | <u>0.332</u> | <u>0.333</u> | <u>0.334</u> | <u>0.326</u> | <u>0.340</u> | <u>0.333</u> | <u>0.343</u> | <u>0.329</u> | <u>0.328</u> | <u>0.331</u> | <u>0.326</u> |
|                                    | 100.00       | 100.00       | 100.00       | 100.00                                | 100.00       | 100.00       | 100.00       | 100.00       | 100.00       | 100.00       | 100.00       | 100.00       | 100.00       | 100.00       | 100.00       | 100.00       | 100.00       | 100.00       | 100.00       | 100.00       |
| Unnormalized Trace Elements (ppm): |              |              |              | Unnormalized Trace Elements (ppm):    |              |              |              |              |              |              |              |              |              |              |              |              |              |              |              |              |
| Ni                                 | 21           | 17           | 13           | 17                                    | 20           | 15           | 22           | 22           | 23           | 21           | 22           | 22           | 16           | 22           | 19           | 24           | 20           | 21           | 16           | 18           |
| Cr                                 | 47           | 47           | 45           | 45                                    | 45           | 47           | 47           | 47           | 46           | 45           | 49           | 46           | 44           | 49           | 45           | 45           | 46           | 45           | 44           | 44           |
| Sc                                 | 38           | 38           | 36           | 36                                    | 36           | 37           | 38           | 38           | 37           | 38           | 39           | 38           | 38           | 38           | 37           | 36           | 37           | 38           | 36           | 38           |
| V                                  | 309          | 310          | 306          | 308                                   | 306          | 310          | 308          | 306          | 307          | 307          | 316          | 311          | 305          | 311          | 305          | 307          | 308          | 311          | 308          | 307          |
| Ba                                 | 480          | 529          | 504          | 491                                   | 486          | 479          | 499          | 492          | 505          | 513          | 519          | 503          | 487          | 526          | 578          | 516          | 494          | 487          | 509          | 488          |
| Rb                                 | 28           | 26           | 27           | 27                                    | 28           | 28           | 32           | 28           | 29           | 29           | 27           | 27           | 28           | 28           | 28           | 28           | 30           | 29           | 28           | 27           |
| Sr                                 | 294          | 305          | 295          | 292                                   | 305          | 299          | 319          | 319          | 318          | 314          | 332          | 315          | 304          | 319          | 314          | 320          | 310          | 310          | 306          | 306          |
| Zr                                 | 148          | 150          | 147          | 147                                   | 155          | 149          | 160          | 160          | 161          | 162          | 166          | 163          | 156          | 161          | 159          | 162          | 159          | 159          | 158          | 157          |
| Y                                  | 33           | 36           | 35           | 33                                    | 34           | 34           | 36           | 34           | 35           | 36           | 37           | 36           | 34           | 35           | 33           | 35           | 35           | 34           | 35           | 34           |
| Nb                                 | 11.3         | 10.4         | 9.8          | 11.2                                  | 11.4         | 9.7          | 10.8         | 11.4         | 11.1         | 11.3         | 11.0         | 11.8         | 11.8         | 10.9         | 10.8         | 10.9         | 11.3         | 11.3         | 11.4         | 11.2         |
| Ga                                 | 22           | 20           | 20           | 20                                    | 20           | 19           | 24           | 20           | 20           | 20           | 22           | 22           | 20           | 20           | 20           | 19           | 20           | 20           | 21           | 20           |
| Cu                                 | 29           | 26           | 29           | 30                                    | 32           | 31           | 33           | 33           | 33           | 31           | 29           | 32           | 32           | 33           | 31           | 32           | 31           | 32           | 32           | 32           |
| Zn                                 | 110          | 112          | 112          | 111                                   | 115          | 113          | 114          | 112          | 114          | 114          | 123          | 114          | 113          | 115          | 116          | 116          | 112          | 112          | 115          | 117          |
| Pb                                 | 7            | 8            | 5            | 4                                     | 5            | 5            | 3            | 4            | 4            | 4            | 4            | 3            | 7            | 3            | 2            | 4            | 4            | 3            | 6            | 6            |
| La                                 | 20           | 20           | 19           | 22                                    | 18           | 19           | 18           | 21           | 19           | 19           | 20           | 21           | 18           | 20           | 22           | 21           | 20           | 20           | 21           | 21           |
| Ce                                 | 36           | 40           | 44           | 40                                    | 42           | 39           | 44           | 41           | 45           | 42           | 49           | 49           | 40           | 43           | 45           | 46           | 43           | 46           | 46           | 42           |
| Th                                 | 3            | 3            | 4            | 2                                     | 2            | 5            | 1            | 2            | 1            | 1            | 1            | 1            | 3            | 1            | 0            | 1            | 0            | 1            | 3            | 2            |
| Nd                                 |              | 29           | 25           | 26                                    | 25           | 23           | 24           | 23           | 25           | 26           | 27           | 27           | 22           | 25           | 25           | 26           | 24           | 25           | 23           | 26           |
| U                                  |              |              |              |                                       |              |              |              |              |              |              |              |              |              | 1            | 0            |              | 1            | 0            |              |              |

Table DR1 (c

| SN                                                | 05092        | 05102        | 05108        | 05132       | 05137        | 05143        | 06018        | 06019        | 06028     | 06030   | 06061   | 06088        | 06111   | 06127     | 06142         | 06148   | 06153        | 06157   | 06174        | 06178        |
|---------------------------------------------------|--------------|--------------|--------------|-------------|--------------|--------------|--------------|--------------|-----------|---------|---------|--------------|---------|-----------|---------------|---------|--------------|---------|--------------|--------------|
| WSU run                                           | 0405(3)      | 0305(2)      | 0405(3)      | 0305(3)     | 0405(2)      | 0405(2)      | 0106(3)      | 0106(3)      | 0106(3)   | 0106(4) | 0106(4) | 0206         | 0306(1) | 0306(1)   | 0306(1)       | 0306(1) | 0306(1)      | 0306(1) | 0306(2)      | 0306(2)      |
| 7.5' Quad                                         | veddle Canyo | Tieton Basin | veddle Canyo | Meeks Table | lanastash La | lanastash La | veddle Canyo | veddle Canyo | Cliffdell | Nile    | Nile    | lanastash La | Nile    | Frost Mtn | eeks Table 7. | Nile    | lanastash La | Nile    | veddle Canyo | veddle Canyo |
| UTM N*                                            | 5176850      | 5174820      | 5173600      | 5186010     | 5197480      | 5195100      | 5173060      | 5173010      | 5201560   | 5185870 | 5189420 | 5195060      | 5188060 | 5207080   | 5181850       | 5182120 | 5195780      | 5190300 | 5175720      | 5175440      |
| UTM E*                                            | 653620       | 646140       | 659580       | 648890      | 658220       | 656300       | 657070       | 657120       | 644960    | 654770  | 657600  | 657900       | 657670  | 653370    | 651240        | 655960  | 656150       | 657390  | 660100       | 659040       |
| Unnormalize                                       |              |              |              |             |              |              |              |              |           |         |         |              |         |           |               |         |              |         |              |              |
| SiO2                                              | 53.87        | 53.42        | 53.65        | 53.49       | 53.35        | 53.38        | 53.52        | 53.31        | 53.47     | 53.06   | 53.28   | 53.79        | 53.66   | 53.70     | 53.52         | 53.80   | 53.74        | 53.39   | 54.62        | 54.08        |
| Al2O3                                             | 14.09        | 13.95        | 14.01        | 13.96       | 14.15        | 14.11        | 14.09        | 13.96        | 13.96     | 13.95   | 13.98   | 14.31        | 14.15   | 14.23     | 13.98         | 14.12   | 14.02        | 14.11   | 14.18        | 14.36        |
| TiO2                                              | 1.756        | 1.793        | 1.846        | 1.808       | 1.814        | 1.833        | 1.820        | 1.839        | 1.831     | 1.803   | 1.813   | 1.848        | 1.825   | 1.818     | 1.754         | 1.831   | 1.826        | 1.779   | 1.846        | 1.861        |
| FeO                                               | 10.40        | 11.13        | 11.09        | 11.20       | 10.40        | 10.64        | 10.99        | 10.68        | 11.25     | 11.06   | 10.94   | 10.43        | 11.10   | 11.35     | 11.25         | 11.33   | 11.23        | 11.46   | 11.02        | 10.95        |
| MnO                                               | 0.197        | 0.212        | 0.201        | 0.204       | 0.192        | 0.202        | 0.205        | 0.199        | 0.205     | 0.204   | 0.204   | 0.206        | 0.213   | 0.208     | 0.204         | 0.206   | 0.204        | 0.212   | 0.203        | 0.202        |
| CaO                                               | 8.38         | 8.78         | 8.61         | 8.73        | 8.92         | 8.75         | 8.65         | 8.74         | 8.74      | 8.62    | 8.68    | 8.90         | 8.75    | 8.79      | 8.80          | 8.70    | 8.71         | 8.73    | 8.39         | 8.81         |
| MgO                                               | 4.79         | 4.88         | 4.58         | 4.86        | 4.69         | 4.60         | 4.94         | 4.75         | 4.74      | 4.90    | 4.94    | 4.66         | 4.63    | 5.06      | 5.16          | 4.95    | 4.73         | 5.21    | 4.41         | 4.66         |
| K2O                                               | 1.29         | 1.18         | 1.21         | 1.17        | 1.24         | 1.30         | 1.20         | 1.29         | 1.16      | 1.25    | 1.15    | 1.28         | 1.20    | 1.16      | 1.09          | 1.31    | 1.25         | 1.05    | 1.47         | 1.26         |
| Na2O                                              | 2.97         | 2.94         | 2.92         | 2.92        | 2.80         | 2.92         | 2.90         | 2.86         | 2.92      | 2.84    | 2.91    | 2.94         | 2.86    | 2.91      | 2.97          | 2.89    | 2.82         | 2.97    | 2.97         | 2.93         |
| P2O5                                              | 0.317        | 0.322        | 0.345        | 0.319       | 0.301        | 0.329        | 0.323        | 0.336        | 0.322     | 0.317   | 0.317   | 0.328        | 0.326   | 0.314     | 0.312         | 0.325   | 0.319        | 0.294   | 0.361        | 0.331        |
| analysis tota                                     | 98.07        | 98.61        | 98.46        | 98.66       | 97.86        | 98.06        | 98.64        | 97.98        | 98.61     | 98.01   | 98.20   | 98.69        | 98.71   | 99.54     | 99.24         | 99.46   | 98.85        | 99.20   | 99.47        | 99.45        |
| Normalized INormalized Major Elements (Weight %): |              |              |              |             |              |              |              |              |           |         |         |              |         |           |               |         |              |         |              |              |
| SiO2                                              | 54.93        | 54.17        | 54.49        | 54.22       | 54.51        | 54.43        | 54.25        | 54.41        | 54.23     | 54.14   | 54.25   | 54.50        | 54.36   | 53.95     | 53.93         | 54.09   | 54.36        | 53.82   | 54.91        | 54.38        |
| Al2O3                                             | 14.37        | 14.15        | 14.23        | 14.15       | 14.46        | 14.39        | 14.28        | 14.25        | 14.15     | 14.23   | 14.24   | 14.50        | 14.34   | 14.30     | 14.29         | 14.19   | 14.19        | 14.22   | 14.26        | 14.44        |
| TiO2                                              | 1.791        | 1.818        | 1.875        | 1.832       | 1.854        | 1.869        | 1.845        | 1.877        | 1.857     | 1.840   | 1.847   | 1.873        | 1.849   | 1.826     | 1.767         | 1.841   | 1.847        | 1.793   | 1.856        | 1.871        |
| FeO*                                              | 10.60        | 11.29        | 11.27        | 11.35       | 10.63        | 10.85        | 11.14        | 10.90        | 11.41     | 11.29   | 11.14   | 10.56        | 11.25   | 11.40     | 11.33         | 11.39   | 11.37        | 11.55   | 11.08        | 11.01        |
| MnO                                               | 0.201        | 0.215        | 0.204        | 0.207       | 0.196        | 0.206        | 0.208        | 0.203        | 0.207     | 0.208   | 0.207   | 0.209        | 0.216   | 0.209     | 0.206         | 0.207   | 0.206        | 0.213   | 0.204        | 0.203        |
| CaO                                               | 8.54         | 8.90         | 8.74         | 8.85        | 9.11         | 8.92         | 8.77         | 8.92         | 8.86      | 8.80    | 8.84    | 9.02         | 8.86    | 8.83      | 8.86          | 8.75    | 8.81         | 8.80    | 8.43         | 8.86         |
| MgO                                               | 4.88         | 4.95         | 4.65         | 4.93        | 4.80         | 4.69         | 5.01         | 4.85         | 4.81      | 5.00    | 5.03    | 4.72         | 4.69    | 5.09      | 5.20          | 4.97    | 4.79         | 5.26    | 4.43         | 4.68         |
| K2O                                               | 1.32         | 1.20         | 1.22         | 1.19        | 1.27         | 1.33         | 1.22         | 1.32         | 1.17      | 1.28    | 1.17    | 1.30         | 1.21    | 1.16      | 1.10          | 1.31    | 1.27         | 1.06    | 1.48         | 1.27         |
| Na2O                                              | 3.03         | 2.98         | 2.97         | 2.96        | 2.86         | 2.98         | 2.94         | 2.92         | 2.97      | 2.89    | 2.96    | 2.98         | 2.89    | 2.92      | 3.00          | 2.91    | 2.85         | 2.99    | 2.99         | 2.95         |
| P2O5                                              | 0.324        | 0.327        | 0.351        | 0.323       | 0.307        | 0.336        | 0.328        | 0.343        | 0.326     | 0.323   | 0.323   | 0.333        | 0.331   | 0.315     | 0.315         | 0.327   | 0.323        | 0.297   | 0.363        | 0.333        |
|                                                   | 100.00       | 100.00       | 100.00       | 100.00      | 100.00       | 100.00       | 100.00       | 100.00       | 100.00    | 100.00  | 100.00  | 100.00       | 100.00  | 100.00    | 100.00        | 100.00  | 100.00       | 100.00  | 100.00       | 100.00       |
| UnnormalizeUnnormalized Trace Elements (ppm):     |              |              |              |             |              |              |              |              |           |         |         |              |         |           |               |         |              |         |              |              |
| Ni                                                | 16           | 23           | 17           | 23          | 21           | 21           | 26           | 22           | 23        | 15      | 14      | 23           | 17      | 17        | 17            | 16      | 17           | 20      | 14           | 15           |
| Cr                                                | 39           | 47           | 42           | 46          | 46           | 44           | 46           | 43           | 45        | 45      | 45      | 46           | 43      | 44        | 47            | 43      | 42           | 44      | 36           | 42           |
| Sc                                                | 36           | 37           | 36           | 38          | 38           | 36           | 36           | 37           | 37        | 36      | 38      | 39           | 37      | 37        | 37            | 37      | 36           | 37      | 35           | 37           |
| V                                                 | 310          | 307          | 301          | 309         | 318          | 309          | 306          | 305          | 310       | 306     | 312     | 317          | 307     | 312       | 301           | 306     | 313          | 315     | 300          | 313          |
| Ba                                                | 579          | 491          | 526          | 477         | 496          | 531          | 493          | 496          | 475       | 474     | 480     | 504          | 480     | 484       | 464           | 498     | 544          | 469     | 594          | 510          |
| Rb                                                | 33           | 29           | 29           | 29          | 26           | 29           | 28           | 29           | 28        | 28      | 27      | 29           | 30      | 27        | 28            | 28      | 31           | 27      | 34           | 29           |
| Sr                                                | 312          | 311          | 312          | 311         | 311          | 312          | 307          | 307          | 304       | 305     | 304     | 312          | 317     | 316       | 316           | 315     | 318          | 309     | 323          | 322          |
| Zr                                                | 160          | 158          | 162          | 159         | 156          | 159          | 155          | 158          | 156       | 154     | 154     | 156          | 159     | 154       | 151           | 159     | 158          | 153     | 170          | 161          |
| Y                                                 | 34           | 34           | 35           | 34          | 35           | 35           | 32           | 32           | 32        | 32      | 32      | 35           | 34      | 34        | 32            | 33      | 33           | 32      | 35           | 34           |
| Nb                                                | 12.1         | 12.3         | 11.1         | 11.7        | 10.9         | 11.8         | 10.1         | 10.3         | 9.9       | 10.2    | 10.8    | 10.4         | 9.9     | 9.5       | 9.1           | 10.1    | 9.8          | 9.8     | 10.7         | 10.4         |
| Ga                                                | 21           | 20           | 20           | 21          | 21           | 21           | 21           | 21           | 20        | 20      | 21      | 22           | 21      | 20        | 20            | 21      | 21           | 18      | 20           | 19           |
| Cu                                                | 23           | 32           | 30           | 34          | 35           | 33           | 32           | 32           | 32        | 32      | 33      | 34           | 33      | 31        | 31            | 30      | 33           | 34      | 25           | 31           |
| Zn                                                | 115          | 115          | 117          | 113         | 117          | 118          | 117          | 118          | 116       | 115     | 116     | 120          | 118     | 119       | 112           | 118     | 116          | 113     | 121          | 120          |
| Pb                                                | 6            | 4            | 7            | 4           | 6            | 6            | 6            | 8            | 7         | 6       | 7       | 7            | 5       | 5         | 5             | 5       | 5            | 4       | 6            | 6            |
| La                                                | 19           | 19           | 19           | 17          | 20           | 20           | 18           | 21           | 19        | 20      | 20      | 21           | 20      | 20        | 18            | 19      | 22           | 21      | 23           | 18           |
| Ce                                                | 47           | 48           | 44           | 41          | 36           | 40           | 45           | 46           | 47        | 44      | 41      | 42           | 39      | 43        | 37            | 43      | 45           | 42      | 46           | 46           |
| Th                                                | 3            | 1            | 2            | 1           | 3            | 3            | 2            | 2            | 1         | 3       | 5       | 3            | 4       | 4         | 4             | 4       | 4            | 3       | 5            | 4            |
| Nd                                                | 25           | 25           | 25           | 25          | 21           | 23           | 25           | 25           | 28        | 23      | 23      | 23           | 25      | 25        | 22            | 24      | 22           | 27      | 24           | 24           |
| U                                                 |              |              |              | 1           |              |              |              |              |           |         |         |              |         |           |               |         |              |         |              |              |

Table DR1 (c

| SN            | 06179        | 07022        | 07029        | 07034        | 08017        | 08019        | 08032        | 08066        | 08068        | 8084         | 08097        | 08098        | 09046        |                 |                |
|---------------|--------------|--------------|--------------|--------------|--------------|--------------|--------------|--------------|--------------|--------------|--------------|--------------|--------------|-----------------|----------------|
| WSU run       | 0306(2)      | 0110         | 0207         | 0207         | 0108(2)      | 0108(2)      | 0108(2)      | 0108(2)      | 0108(2)      | 0108(3)      | 0208         | 0208         | 0109(2)      |                 |                |
| 7.5' Quad     | veddle Canyc | Mt. Clifty   | veddle Canyc | Old Scab Mtn | veddle Canyc | Tieton       | Nile         | Frost Mtn    | Frost Mtn    | Tieton       | Frost Mtn    | Frost Mtn    | Frost Mtn    |                 |                |
| UTM N*        | 5175590      | 5210100      | 5177960      | 5195020      | 5178220      | 5176220      | 5181360      | 5209060      | 5209480      | 5178980      | 5213930      | 5214460      | 5207980      |                 |                |
| UTM E*        | 658870       | 640100       | 656140       | 639920       | 661670       | 667780       | 662060       | 658630       | 658570       | 663310       | 659220       | 656810       | 660760       |                 |                |
| Unnormalize   |              |              |              |              |              |              |              |              |              |              |              |              |              |                 |                |
| SiO2          | 54.00        | 53.40        | 53.52        | 51.90        | 53.18        | 52.89        | 53.59        | 53.51        | 52.79        | 54.55        | 53.15        | 53.37        | 53.18        |                 |                |
| Al2O3         | 14.19        | 13.89        | 14.02        | 13.68        | 14.00        | 13.94        | 14.85        | 14.08        | 14.52        | 14.50        | 14.14        | 14.14        | 13.97        |                 |                |
| TiO2          | 1.835        | 1.831        | 1.861        | 1.772        | 1.853        | 1.816        | 1.829        | 1.853        | 1.758        | 1.918        | 1.830        | 1.838        | 1.818        |                 |                |
| FeO           | 11.36        | 11.64        | 11.35        | 11.32        | 11.07        | 11.26        | 9.33         | 11.20        | 10.13        | 9.26         | 10.52        | 10.89        | 11.34        |                 |                |
| MnO           | 0.204        | 0.197        | 0.205        | 0.200        | 0.203        | 0.202        | 0.162        | 0.201        | 0.187        | 0.160        | 0.196        | 0.196        | 0.199        |                 |                |
| CaO           | 8.75         | 8.63         | 8.62         | 8.72         | 8.65         | 8.62         | 8.20         | 8.70         | 9.12         | 8.34         | 8.74         | 8.70         | 8.67         |                 |                |
| MgO           | 4.88         | 4.73         | 4.83         | 4.73         | 4.79         | 4.90         | 4.29         | 4.90         | 4.91         | 4.35         | 4.69         | 4.75         | 4.98         |                 |                |
| K2O           | 1.26         | 1.04         | 1.39         | 1.21         | 1.30         | 1.13         | 1.28         | 1.26         | 1.17         | 1.38         | 1.21         | 1.13         | 1.16         |                 |                |
| Na2O          | 2.90         | 2.90         | 2.87         | 2.87         | 2.83         | 2.98         | 2.81         | 2.90         | 2.85         | 2.91         | 2.88         | 2.94         | 2.89         |                 |                |
| P2O5          | <u>0.330</u> | <u>0.332</u> | <u>0.351</u> | <u>0.314</u> | <u>0.333</u> | <u>0.325</u> | <u>0.314</u> | <u>0.325</u> | <u>0.292</u> | <u>0.351</u> | <u>0.323</u> | <u>0.323</u> | <u>0.321</u> | <u>averages</u> | <u>std dev</u> |
| analysis tota | 99.71        | 98.60        | 99.01        | 96.70        | 98.21        | 98.06        | 96.66        | 98.93        | 97.72        | 97.71        | 97.67        | 98.28        | 98.53        | 98.70           | 0.78           |
| Normalized I  |              |              |              |              |              |              |              |              |              |              |              |              |              |                 |                |
| SiO2          | 54.16        | 54.16        | 54.06        | 53.67        | 54.15        | 53.93        | 55.44        | 54.09        | 54.02        | 55.83        | 54.41        | 54.31        | 53.97        | 54.18           | 0.35           |
| Al2O3         | 14.23        | 14.09        | 14.16        | 14.14        | 14.25        | 14.21        | 15.36        | 14.23        | 14.86        | 14.84        | 14.48        | 14.39        | 14.18        | 14.26           | 0.20           |
| TiO2          | 1.840        | 1.857        | 1.880        | 1.833        | 1.887        | 1.852        | 1.892        | 1.873        | 1.799        | 1.963        | 1.874        | 1.870        | 1.845        | 1.841           | 0.035          |
| FeO*          | 11.39        | 11.81        | 11.46        | 11.71        | 11.27        | 11.48        | 9.65         | 11.32        | 10.36        | 9.48         | 10.77        | 11.08        | 11.51        | 11.24           | 0.42           |
| MnO           | 0.204        | 0.200        | 0.207        | 0.206        | 0.206        | 0.206        | 0.167        | 0.204        | 0.191        | 0.164        | 0.200        | 0.200        | 0.202        | 0.205           | 0.008          |
| CaO           | 8.78         | 8.75         | 8.71         | 9.01         | 8.81         | 8.79         | 8.48         | 8.80         | 9.33         | 8.53         | 8.95         | 8.85         | 8.80         | 8.85            | 0.16           |
| MgO           | 4.90         | 4.80         | 4.87         | 4.89         | 4.87         | 5.00         | 4.44         | 4.95         | 5.02         | 4.45         | 4.81         | 4.83         | 5.05         | 4.92            | 0.20           |
| K2O           | 1.26         | 1.06         | 1.40         | 1.25         | 1.33         | 1.15         | 1.33         | 1.27         | 1.19         | 1.41         | 1.24         | 1.15         | 1.18         | 1.22            | 0.08           |
| Na2O          | 2.91         | 2.94         | 2.90         | 2.97         | 2.88         | 3.04         | 2.91         | 2.93         | 2.92         | 2.97         | 2.95         | 2.99         | 2.93         | 2.94            | 0.09           |
| P2O5          | <u>0.331</u> | <u>0.337</u> | <u>0.354</u> | <u>0.325</u> | <u>0.339</u> | <u>0.331</u> | <u>0.325</u> | <u>0.329</u> | <u>0.299</u> | <u>0.360</u> | <u>0.331</u> | <u>0.329</u> | <u>0.326</u> | 0.329           | 0.011          |
|               | 100.00       | 100.00       | 100.00       | 100.00       | 100.00       | 100.00       | 100.00       | 100.00       | 100.00       | 100.00       | 100.00       | 100.00       | 100.00       |                 |                |
| Unnormalize   |              |              |              |              |              |              |              |              |              |              |              |              |              |                 |                |
| Ni            | 18           | 18           | 9            | 11           | 12           | 13           | 11           | 14           | 15           | 13           | 13           | 15           | 18           | 16              | 5              |
| Cr            | 42           | 40           | 41           | 43           | 41           | 41           | 40           | 41           | 53           | 42           | 42           | 42           | 39           | 46              | 4              |
| Sc            | 36           | 35           | 37           | 36           | 38           | 36           | 37           | 38           | 38           | 38           | 36           | 37           | 36           | 37              | 3              |
| V             | 309          | 311          | 308          | 301          | 305          | 304          | 286          | 312          | 315          | 300          | 314          | 308          | 306          | 307             | 7              |
| Ba            | 488          | 461          | 510          | 478          | 508          | 490          | 611          | 499          | 465          | 576          | 495          | 504          | 471          | 496             | 30             |
| Rb            | 28           | 28           | 29           | 29           | 27           | 29           | 28           | 28           | 25           | 31           | 29           | 29           | 28           | 28              | 2              |
| Sr            | 317          | 311          | 312          | 312          | 309          | 305          | 336          | 311          | 317          | 333          | 313          | 313          | 309          | 309             | 8              |
| Zr            | 160          | 164          | 166          | 157          | 162          | 159          | 169          | 162          | 154          | 170          | 162          | 163          | 158          | 156             | 5              |
| Y             | 34           | 35           | 35           | 32           | 34           | 32           | 33           | 34           | 34           | 39           | 36           | 42           | 35           | 34              | 2              |
| Nb            | 10.7         | 12.2         | 10.2         | 9.9          | 9.9          | 9.8          | 10.7         | 9.8          | 9.0          | 10.7         | 9.7          | 10.0         | 11.3         | 11.2            | 1.0            |
| Ga            | 19           | 21           | 19           | 20           | 19           | 20           | 20           | 20           | 20           | 19           | 21           | 20           | 21           | 20              | 1              |
| Cu            | 32           | 34           | 32           | 33           | 33           | 32           | 22           | 34           | 36           | 28           | 34           | 36           | 33           | 31              | 4              |
| Zn            | 118          | 117          | 119          | 113          | 126          | 121          | 130          | 123          | 119          | 145          | 121          | 126          | 116          | 115             | 5              |
| Pb            | 6            | 5            | 5            | 5            | 7            | 7            | 7            | 6            | 6            | 6            | 6            | 6            | 5            | 5               | 2              |
| La            | 20           | 22           | 21           | 20           | 22           | 22           | 24           | 20           | 22           | 25           | 21           | 22           | 22           | 19              | 4              |
| Ce            | 45           | 52           | 47           | 41           | 42           | 41           | 44           | 42           | 37           | 41           | 44           | 45           | 39           | 42              | 7              |
| Th            | 4            | 2            | 4            | 4            | 4            | 4            | 4            | 3            | 4            | 3            | 5            | 6            | 4            | 3               | 2              |
| Nd            | 27           | 26           |              | 23           | 25           | 25           | 27           | 23           | 22           | 25           | 25           | 26           | 22           | 25              | 2              |
| U             |              | 1            |              |              |              |              | 1            | 1            | 1            |              | 3            | 2            | 1            | 1               | 1              |

Table DR1 (continued). ANALYSES OF GRANDE RONDE BASALT LAVA FLOWS IN UPPER NACHES RIVER BASIN, YAKIMA AND KITTITAS COUNTIES, WASHINGTON

| lower McCOY CANYON                      |              |           |           |           |            |         |         |           |            |               |                          |               |               |         |         |         |         |         |         |         |
|-----------------------------------------|--------------|-----------|-----------|-----------|------------|---------|---------|-----------|------------|---------------|--------------------------|---------------|---------------|---------|---------|---------|---------|---------|---------|---------|
| SN                                      | 96123        | 96194     | 99016     | 99029     | 99061      | 99161   | 99162   | 02021     | 03006      | 03179         | 03180                    | 03182         | 03183         | '04045  | '04046  | '04050  | '04051  | '04052  | '04053  | '04078  |
| WSU run                                 | 0897(1)      | 0202      | 0799      | 0799      | 0799       | 0300    | 0300    | 0402      | 0204       | 0204          | 0106(1)                  | 0204          | 0106(1)       | 0404(1) | 0404(1) | 0404(1) | 0404(1) | 0404(1) | 0404(1) | 0404(1) |
| 7.5' Quad                               | Old Scab Mtn | Cliffdell | Cliffdell | Cliffdell | Quartz Mtn | Nile    | Nile    | Cliffdell | Quartz Mtn | Ianastash Lak | Manastash Llanastash Lak | Manastash Lak | Manastash Lak | Nile    |
| UTM N*                                  | 5196380      | 5204810   | 5203880   | 5303100   | 5207830    | 5183530 | 5183530 | 5205090   | 5207000    | 5199520       | 5198040                  | 5196950       | 5196900       | 5184780 | 5182845 | 5182840 | 5182830 | 5183340 | 5184260 | 5186670 |
| UTM E*                                  | 640820       | 644830    | 646920    | 647630    | 650900     | 654230  | 654230  | 644440    | 644700     | 656700        | 656260                   | 654690        | 654840        | 656460  | 657860  | 657920  | 658020  | 658340  | 657960  | 658400  |
| Unnormalized Major Elements (Weight %): |              |           |           |           |            |         |         |           |            |               |                          |               |               |         |         |         |         |         |         |         |
| SiO2                                    | 53.75        | 53.24     | 53.82     | 53.79     | 53.37      | 53.91   | 53.72   | 53.07     | 53.49      | 53.66         | 53.28                    | 53.46         | 53.47         | 53.98   | 53.90   | 53.90   | 53.97   | 53.91   | 54.03   | 53.84   |
| Al2O3                                   | 13.54        | 13.77     | 14.07     | 14.20     | 13.86      | 13.86   | 13.82   | 13.68     | 13.98      | 14.10         | 13.86                    | 13.81         | 14.03         | 13.90   | 14.08   | 13.86   | 13.96   | 13.89   | 14.17   | 14.01   |
| TiO2                                    | 1.919        | 1.933     | 1.941     | 1.934     | 1.936      | 1.971   | 1.937   | 1.903     | 1.904      | 1.917         | 1.899                    | 1.895         | 1.896         | 1.963   | 1.943   | 1.976   | 1.972   | 1.985   | 1.941   | 1.935   |
| FeO                                     | 11.58        | 11.55     | 11.35     | 11.51     | 11.49      | 11.82   | 12.03   | 12.07     | 12.23      | 12.05         | 11.29                    | 12.66         | 10.88         | 12.12   | 11.72   | 12.09   | 12.04   | 12.24   | 11.71   | 12.08   |
| MnO                                     | 0.187        | 0.226     | 0.208     | 0.217     | 0.193      | 0.207   | 0.207   | 0.215     | 0.225      | 0.207         | 0.205                    | 0.205         | 0.206         | 0.214   | 0.208   | 0.214   | 0.213   | 0.215   | 0.209   | 0.216   |
| CaO                                     | 7.47         | 8.65      | 8.67      | 8.62      | 8.55       | 8.63    | 8.63    | 8.51      | 8.64       | 8.65          | 8.44                     | 8.42          | 8.56          | 8.39    | 8.69    | 8.47    | 8.49    | 8.43    | 8.72    | 8.49    |
| MgO                                     | 4.26         | 4.88      | 4.73      | 4.47      | 4.58       | 4.54    | 4.60    | 4.71      | 4.89       | 4.83          | 4.64                     | 4.56          | 4.64          | 4.55    | 4.84    | 4.53    | 4.55    | 4.57    | 4.42    | 4.73    |
| K2O                                     | 1.60         | 1.11      | 1.24      | 1.25      | 1.05       | 1.33    | 1.21    | 1.19      | 0.92       | 1.33          | 1.28                     | 1.12          | 1.32          | 1.31    | 1.12    | 1.25    | 1.28    | 1.33    | 1.22    | 1.25    |
| Na2O                                    | 3.07         | 2.92      | 2.97      | 2.96      | 3.03       | 2.85    | 2.85    | 2.87      | 3.07       | 2.86          | 2.88                     | 3.03          | 2.88          | 2.98    | 3.02    | 2.96    | 2.95    | 2.94    | 2.94    | 2.96    |
| P2O5                                    | 0.321        | 0.291     | 0.302     | 0.307     | 0.294      | 0.303   | 0.296   | 0.285     | 0.290      | 0.290         | 0.285                    | 0.290         | 0.286         | 0.320   | 0.293   | 0.315   | 0.311   | 0.318   | 0.298   | 0.326   |
| analysis tota                           | 97.69        | 98.57     | 99.30     | 99.26     | 98.35      | 99.43   | 99.30   | 98.51     | 99.64      | 99.89         | 98.06                    | 99.45         | 98.17         | 99.72   | 99.81   | 99.57   | 99.73   | 99.83   | 99.64   | 99.85   |
| Normalized Major Elements (Weight %):   |              |           |           |           |            |         |         |           |            |               |                          |               |               |         |         |         |         |         |         |         |
| SiO2                                    | 55.02        | 54.01     | 54.20     | 54.19     | 54.27      | 54.22   | 54.10   | 53.87     | 53.68      | 53.72         | 54.33                    | 53.76         | 54.47         | 54.13   | 54.00   | 54.14   | 54.12   | 54.00   | 54.22   | 53.92   |
| Al2O3                                   | 13.86        | 13.97     | 14.17     | 14.31     | 14.09      | 13.94   | 13.92   | 13.89     | 14.03      | 14.11         | 14.14                    | 13.89         | 14.29         | 13.94   | 14.10   | 13.92   | 13.99   | 13.92   | 14.22   | 14.03   |
| TiO2                                    | 1.964        | 1.961     | 1.955     | 1.948     | 1.968      | 1.982   | 1.951   | 1.932     | 1.910      | 1.919         | 1.937                    | 1.905         | 1.931         | 1.969   | 1.947   | 1.985   | 1.977   | 1.988   | 1.948   | 1.938   |
| FeO*                                    | 11.85        | 11.72     | 11.43     | 11.60     | 11.68      | 11.89   | 12.12   | 12.26     | 12.28      | 12.06         | 11.51                    | 12.73         | 11.09         | 12.15   | 11.74   | 12.15   | 12.07   | 12.26   | 11.75   | 12.10   |
| MnO                                     | 0.191        | 0.229     | 0.209     | 0.219     | 0.196      | 0.208   | 0.208   | 0.218     | 0.226      | 0.207         | 0.209                    | 0.206         | 0.210         | 0.214   | 0.208   | 0.215   | 0.214   | 0.216   | 0.209   | 0.216   |
| CaO                                     | 7.65         | 8.78      | 8.73      | 8.68      | 8.69       | 8.68    | 8.69    | 8.64      | 8.67       | 8.65          | 8.61                     | 8.46          | 8.72          | 8.41    | 8.70    | 8.51    | 8.51    | 8.44    | 8.75    | 8.50    |
| MgO                                     | 4.36         | 4.95      | 4.76      | 4.50      | 4.66       | 4.57    | 4.63    | 4.78      | 4.91       | 4.84          | 4.74                     | 4.59          | 4.72          | 4.57    | 4.85    | 4.55    | 4.57    | 4.57    | 4.44    | 4.74    |
| K2O                                     | 1.64         | 1.13      | 1.25      | 1.26      | 1.07       | 1.34    | 1.22    | 1.21      | 0.92       | 1.34          | 1.30                     | 1.12          | 1.35          | 1.32    | 1.12    | 1.26    | 1.29    | 1.34    | 1.22    | 1.26    |
| Na2O                                    | 3.14         | 2.96      | 2.99      | 2.98      | 3.08       | 2.87    | 2.87    | 2.91      | 3.08       | 2.86          | 2.94                     | 3.05          | 2.94          | 2.98    | 3.03    | 2.97    | 2.95    | 2.94    | 2.95    | 2.97    |
| P2O5                                    | 0.329        | 0.295     | 0.304     | 0.309     | 0.299      | 0.305   | 0.298   | 0.289     | 0.291      | 0.290         | 0.290                    | 0.292         | 0.291         | 0.320   | 0.294   | 0.316   | 0.312   | 0.318   | 0.299   | 0.326   |
| analysis total                          | 100.00       | 100.00    | 100.00    | 100.00    | 100.00     | 100.00  | 100.00  | 100.00    | 100.00     | 100.00        | 100.00                   | 100.00        | 100.00        | 100.00  | 100.00  | 100.00  | 100.00  | 100.00  | 100.00  | 100.00  |
| Unnormalized Trace Elements (ppm):      |              |           |           |           |            |         |         |           |            |               |                          |               |               |         |         |         |         |         |         |         |
| Ni                                      | 6            | 10        | 9         | 7         | 10         | 8       | 11      | 9         | 8          | 7             | 26                       | 8             | 26            | 12      | 12      | 11      | 11      | 9       | 15      | 14      |
| Cr                                      | 26           | 36        | 37        | 33        | 37         | 34      | 35      | 37        | 19         | 19            | 25                       | 18            | 26            | 18      | 21      | 20      | 20      | 20      | 22      | 23      |
| Sc                                      | 26           | 41        | 43        | 39        | 40         | 37      | 37      | 36        | 37         | 36            | 36                       | 36            | 36            | 36      | 38      | 37      | 37      | 37      | 38      | 37      |
| V                                       | 350          | 326       | 347       | 334       | 359        | 330     | 328     | 325       | 338        | 341           | 337                      | 336           | 335           | 345     | 347     | 345     | 345     | 344     | 342     | 341     |
| Ba                                      | 624          | 448       | 464       | 468       | 458        | 486     | 453     | 451       | 451        | 469           | 466                      | 461           | 462           | 510     | 466     | 514     | 503     | 514     | 465     | 495     |
| Rb                                      | 40           | 26        | 27        | 29        | 22         | 30      | 28      | 26        | 27         | 29            | 28                       | 28            | 28            | 33      | 27      | 32      | 31      | 32      | 31      | 32      |
| Sr                                      | 309          | 312       | 311       | 316       | 311        | 317     | 318     | 310       | 314        | 317           | 309                      | 309           | 314           | 318     | 316     | 320     | 317     | 316     | 326     | 316     |
| Zr                                      | 163          | 151       | 150       | 153       | 154        | 158     | 154     | 153       | 157        | 157           | 151                      | 155           | 151           | 157     | 155     | 158     | 158     | 158     | 155     | 153     |
| Y                                       | 34           | 34        | 34        | 35        | 33         | 34      | 34      | 33        | 33         | 33            | 30                       | 33            | 30            | 32      | 32      | 33      | 33      | 33      | 32      | 32      |
| Nb                                      | 13.2         | 10.8      | 12.4      | 13.8      | 12.7       | 12.9    | 11.2    | 12.0      | 10.7       | 10.7          | 9.9                      | 11.7          | 9.4           | 12.4    | 11.5    | 11.6    | 12.3    | 12.2    | 12.6    | 11.9    |
| Ga                                      | 21           | 21        | 21        | 20        | 20         | 21      | 22      | 20        | 22         | 22            | 22                       | 18            | 22            | 22      | 20      | 21      | 22      | 20      | 22      | 21      |
| Cu                                      | 21           | 26        | 25        | 27        | 30         | 28      | 30      | 25        | 22         | 23            | 26                       | 21            | 27            | 17      | 17      | 16      | 15      | 15      | 18      | 15      |
| Zn                                      | 109          | 108       | 112       | 114       | 113        | 115     | 111     | 112       | 115        | 119           | 114                      | 113           | 113           | 118     | 116     | 118     | 118     | 118     | 117     | 116     |
| Pb                                      | 7            | 6         | 3         | 6         | 6          | 8       | 7       | 3         | 5          | 7             | 5                        | 6             | 7             | 7       | 5       | 7       | 6       | 5       | 5       | 5       |
| La                                      | 33           | 22        | 10        | 15        | 25         | 24      | 23      | 15        | 18         | 19            | 15                       | 14            | 23            | 18      | 19      | 15      | 17      | 19      | 18      | 15      |
| Ce                                      | 35           | 33        | 40        | 32        | 41         | 39      | 60      | 37        | 43         | 38            | 37                       | 42            | 42            | 41      | 48      | 47      | 39      | 38      | 42      | 44      |
| Th                                      | 7            | 1         | 5         | 4         | 6          | 5       | 4       | 4         | 2          | 4             | 3                        | 4             | 1             | 3       | 3       | 4       | 3       | 4       | 3       | 3       |
| Nd                                      | nd           |           |           |           |            |         |         |           |            |               | 24                       |               | 24            | 25      | 22      | 29      | 24      | 22      | 26      | 25      |
| U                                       | nd           |           |           |           |            |         |         |           |            |               |                          |               |               |         |         |         |         |         |         |         |

\*to nearest 5 m  
"†" denotes values >120% of highest standard.  
nd, not determined

Table DR1 (c

| MT?                                   |              |              |              |              |              |              |              |              |              |              |              |              |              |              |              |              |              |              |              |              |
|---------------------------------------|--------------|--------------|--------------|--------------|--------------|--------------|--------------|--------------|--------------|--------------|--------------|--------------|--------------|--------------|--------------|--------------|--------------|--------------|--------------|--------------|
| SN                                    | 04099        | 04100        | 04108        | 04123        | 04129        | 04134        | '04135       | '04177       | 04203        | 04229        | 05029        | 05030        | 05040        | 05041        | 05044        | 05047        | 05048        | 05049        | 05050        | 05086        |
| WSU run                               | 0404(2)      | 0405(2)      | 0405(4)      | 0504(2)      | 0404(2)      | 0404(2)      | 0404(2)      | 0504(1)      | 0504(2)      | 0405(2)      | 0405(2)      | 0405(4)      | 0405(4)      | 0305(1)      | 0305(1)      | 0305(1)      | 0305(1)      | 0305(1)      | 0305(1)      | 0405(4)      |
| 7.5' Quad                             | lanastash La | Kanastash La | Nile         | Nile         | lanastash La | Kanastash La | Weddle Canyo |
| UTM N*                                | 5204210      | 5204630      | 5205820      | 5195900      | 5202320      | 5200260      | 5190060      | 5185680      | 5193090      | 5197410      | 5178290      | 5178370      | 5174890      | 5174860      | 5176810      | 5173620      | 5173580      | 5173900      | 5173760      | 5176540      |
| UTM E*                                | 658460       | 657850       | 655190       | 656600       | 658290       | 656900       | 656560       | 658500       | 653650       | 657440       | 656620       | 656880       | 655320       | 655490       | 657880       | 657240       | 657040       | 656545       | 656315       | 653640       |
| Unnormalize                           |              |              |              |              |              |              |              |              |              |              |              |              |              |              |              |              |              |              |              |              |
| SiO2                                  | 53.59        | 53.77        | 53.13        | 53.66        | 53.60        | 53.38        | 53.52        | 53.68        | 53.52        | 53.02        | 53.71        | 53.56        | 54.66        | 53.98        | 53.07        | 53.55        | 53.66        | 54.12        | 54.78        | 53.31        |
| Al2O3                                 | 13.93        | 14.11        | 13.84        | 14.05        | 14.02        | 13.96        | 13.91        | 1.967        | 13.95        | 13.78        | 13.72        | 14.33        | 14.52        | 14.07        | 13.61        | 13.82        | 13.83        | 14.00        | 14.48        | 13.82        |
| TiO2                                  | 1.940        | 1.933        | 1.909        | 1.902        | 1.932        | 1.922        | 1.929        | 13.79        | 1.913        | 1.905        | 2.022        | 1.936        | 2.039        | 1.943        | 1.888        | 1.911        | 1.931        | 1.940        | 1.976        | 1.922        |
| FeO                                   | 11.91        | 11.20        | 11.75        | 11.20        | 12.11        | 11.82        | 11.98        | 11.86        | 11.59        | 11.67        | 11.86        | 10.51        | 9.21         | 10.95        | 11.58        | 11.79        | 11.64        | 11.29        | 9.92         | 11.58        |
| MnO                                   | 0.213        | 0.217        | 0.210        | 0.203        | 0.209        | 0.213        | 0.215        | 0.214        | 0.221        | 0.207        | 0.209        | 0.189        | 0.184        | 0.199        | 0.208        | 0.207        | 0.208        | 0.197        | 0.182        | 0.207        |
| CaO                                   | 8.63         | 8.77         | 8.54         | 8.68         | 8.66         | 8.71         | 8.64         | 4.40         | 8.60         | 8.44         | 8.31         | 8.82         | 8.64         | 8.78         | 8.52         | 8.66         | 8.53         | 8.77         | 8.83         | 8.51         |
| MgO                                   | 4.74         | 4.71         | 4.64         | 4.51         | 4.63         | 4.78         | 4.85         | 8.38         | 4.64         | 4.69         | 4.32         | 4.41         | 4.27         | 4.52         | 4.71         | 4.67         | 4.69         | 4.23         | 4.51         | 4.72         |
| K2O                                   | 1.39         | 1.25         | 1.07         | 1.30         | 1.33         | 1.36         | 1.33         | 2.93         | 1.29         | 1.25         | 1.31         | 1.22         | 1.35         | 1.29         | 1.23         | 1.22         | 1.30         | 1.33         | 1.42         | 1.26         |
| Na2O                                  | 2.86         | 2.83         | 2.87         | 2.85         | 2.85         | 2.90         | 2.85         | 1.25         | 2.86         | 2.91         | 2.98         | 2.91         | 2.93         | 2.91         | 2.91         | 2.91         | 2.89         | 2.87         | 2.94         | 2.88         |
| P2O5                                  | <u>0.290</u> | <u>0.292</u> | <u>0.318</u> | <u>0.292</u> | <u>0.294</u> | <u>0.302</u> | <u>0.291</u> | <u>0.320</u> | <u>0.320</u> | <u>0.289</u> | <u>0.324</u> | <u>0.287</u> | <u>0.305</u> | <u>0.293</u> | <u>0.280</u> | <u>0.287</u> | <u>0.295</u> | <u>0.289</u> | <u>0.311</u> | <u>0.290</u> |
| analysis tota                         | 99.50        | 99.07        | 98.27        | 98.63        | 99.63        | 99.34        | 99.50        | 98.78        | 98.90        | 98.18        | 98.77        | 98.18        | 98.10        | 98.94        | 98.01        | 99.03        | 98.98        | 99.03        | 99.35        | 98.51        |
| Normalized I                          |              |              |              |              |              |              |              |              |              |              |              |              |              |              |              |              |              |              |              |              |
| Normalized Major Elements (Weight %): |              |              |              |              |              |              |              |              |              |              |              |              |              |              |              |              |              |              |              |              |
| SiO2                                  | 53.87        | 54.27        | 54.07        | 54.40        | 53.79        | 53.73        | 54.34        | 54.11        | 54.00        | 54.38        | 54.55        | 55.72        | 54.55        | 54.15        | 54.08        | 54.22        | 54.65        | 55.14        | 54.12        |              |
| Al2O3                                 | 14.00        | 14.24        | 14.08        | 14.24        | 14.07        | 14.05        | 13.98        | 13.96        | 14.11        | 14.04        | 13.89        | 14.60        | 14.81        | 14.22        | 13.88        | 13.95        | 13.97        | 14.13        | 14.57        | 14.03        |
| TiO2                                  | 1.949        | 1.952        | 1.943        | 1.928        | 1.939        | 1.935        | 1.938        | 1.991        | 1.934        | 1.940        | 2.047        | 1.971        | 2.079        | 1.963        | 1.927        | 1.930        | 1.951        | 1.959        | 1.989        | 1.952        |
| FeO*                                  | 11.97        | 11.30        | 11.95        | 11.35        | 12.16        | 11.90        | 12.04        | 12.01        | 11.72        | 11.89        | 12.01        | 10.70        | 9.39         | 11.07        | 11.81        | 11.91        | 11.76        | 11.40        | 9.98         | 11.75        |
| MnO                                   | 0.214        | 0.219        | 0.213        | 0.206        | 0.210        | 0.215        | 0.216        | 0.216        | 0.224        | 0.211        | 0.211        | 0.193        | 0.188        | 0.201        | 0.212        | 0.209        | 0.210        | 0.199        | 0.183        | 0.210        |
| CaO                                   | 8.68         | 8.85         | 8.69         | 8.80         | 8.69         | 8.76         | 8.68         | 8.48         | 8.70         | 8.60         | 8.41         | 8.99         | 8.81         | 8.88         | 8.69         | 8.74         | 8.62         | 8.86         | 8.89         | 8.64         |
| MgO                                   | 4.76         | 4.75         | 4.72         | 4.57         | 4.65         | 4.82         | 4.87         | 4.45         | 4.69         | 4.78         | 4.38         | 4.50         | 4.35         | 4.57         | 4.81         | 4.72         | 4.74         | 4.27         | 4.54         | 4.79         |
| K2O                                   | 1.39         | 1.26         | 1.09         | 1.32         | 1.34         | 1.37         | 1.34         | 1.27         | 1.30         | 1.28         | 1.33         | 1.25         | 1.37         | 1.31         | 1.26         | 1.23         | 1.31         | 1.35         | 1.43         | 1.28         |
| Na2O                                  | 2.87         | 2.86         | 2.92         | 2.89         | 2.86         | 2.92         | 2.86         | 2.96         | 2.89         | 2.96         | 3.02         | 2.97         | 2.98         | 2.94         | 2.97         | 2.94         | 2.92         | 2.90         | 2.96         | 2.93         |
| P2O5                                  | <u>0.292</u> | <u>0.295</u> | <u>0.323</u> | <u>0.296</u> | <u>0.295</u> | <u>0.304</u> | <u>0.293</u> | <u>0.324</u> | <u>0.323</u> | <u>0.294</u> | 0.328        | 0.292        | 0.311        | 0.296        | 0.286        | 0.290        | 0.298        | 0.291        | 0.313        | 0.295        |
| analysis total                        | 100.00       | 100.00       | 100.00       | 100.00       | 100.00       | 100.00       | 100.00       | 100.00       | 100.00       | 100.00       | 100.00       | 100.00       | 100.00       | 100.00       | 100.00       | 100.00       | 100.00       | 100.00       | 100.00       | 100.00       |
| Unnormalize                           |              |              |              |              |              |              |              |              |              |              |              |              |              |              |              |              |              |              |              |              |
| Unnormalized Trace Elements (ppm):    |              |              |              |              |              |              |              |              |              |              |              |              |              |              |              |              |              |              |              |              |
| Ni                                    | 13           | 16           | 14           | 11           | 16           | 16           | 15           | 13           | 10           | 16           | 17           | 15           | 14           | 20           | 19           | 20           | 20           | 19           | 18           | 13           |
| Cr                                    | 21           | 23           | 24           | 24           | 22           | 20           | 21           | 23           | 23           | 24           | 23           | 25           | 24           | 26           | 26           | 26           | 25           | 26           | 26           | 22           |
| Sc                                    | 38           | 39           | 37           | 37           | 37           | 38           | 37           | 37           | 37           | 37           | 38           | 39           | 41           | 39           | 39           | 39           | 38           | 38           | 40           | 38           |
| V                                     | 344          | 366          | 349          | 337          | 341          | 342          | 341          | 344          | 344          | 336          | 351          | 342          | 348          | 346          | 338          | 344          | 341          | 343          | 346          | 339          |
| Ba                                    | 471          | 528          | 500          | 481          | 476          | 475          | 465          | 508          | 477          | 468          | 520          | 504          | 641          | 489          | 461          | 466          | 493          | 465          | 520          | 493          |
| Rb                                    | 30           | 28           | 27           | 28           | 28           | 30           | 31           | 30           | 28           | 29           | 31           | 24           | 31           | 29           | 28           | 30           | 30           | 33           | 32           | 29           |
| Sr                                    | 312          | 327          | 315          | 312          | 315          | 314          | 312          | 311          | 305          | 315          | 321          | 329          | 344          | 329          | 313          | 321          | 321          | 329          | 341          | 314          |
| Zr                                    | 154          | 157          | 155          | 146          | 153          | 153          | 152          | 150          | 146          | 155          | 165          | 156          | 166          | 159          | 157          | 158          | 160          | 160          | 167          | 156          |
| Y                                     | 32           | 35           | 34           | 33           | 34           | 32           | 32           | 33           | 32           | 33           | 35           | 36           | 42           | 34           | 34           | 33           | 34           | 34           | 36           | 34           |
| Nb                                    | 11.9         | 10.8         | 12.1         | 10.9         | 11.4         | 11.5         | 11.5         | 10.8         | 10.9         | 12.2         | 11.6         | 10.6         | 11.9         | 11.0         | 11.0         | 11.1         | 11.5         | 11.0         | 11.6         | 11.0         |
| Ga                                    | 23           | 20           | 19           | 21           | 21           | 22           | 20           | 22           | 21           | 18           | 20           | 22           | 23           | 21           | 20           | 22           | 21           | 21           | 22           | 21           |
| Cu                                    | 11           | 26           | 26           | 23           | 18           | 17           | 17           | 22           | 24           | 24           | 24           | 24           | 27           | 27           | 26           | 29           | 26           | 28           | 28           | 25           |
| Zn                                    | 116          | 121          | 117          | 114          | 115          | 114          | 115          | 114          | 115          | 114          | 117          | 120          | 128          | 116          | 113          | 113          | 116          | 115          | 120          | 115          |
| Pb                                    | 7            | 6            | 6            | 8            | 4            | 3            | 6            | 6            | 6            | 8            | 4            | 7            | 7            | 4            | 4            | 4            | 4            | 4            | 4            | 7            |
| La                                    | 20           | 20           | 18           | 17           | 21           | 17           | 22           | 23           | 18           | 20           | 23           | 23           | 28           | 14           | 17           | 18           | 19           | 18           | 20           | 19           |
| Ce                                    | 44           | 42           | 40           | 37           | 49           | 38           | 41           | 37           | 42           | 41           | 47           | 40           | 43           | 44           | 40           | 39           | 44           | 43           | 44           | 44           |
| Th                                    | 4            | 3            | 3            | 3            | 3            | 4            | 4            | 4            | 4            | 3            | 2            | 3            | 3            | 0            | 1            | 1            | 1            | 1            | 1            | 1            |
| Nd                                    | 23           | 25           | 23           | 24           | 27           | 21           | 23           | 24           | 24           | 23           | 26           | 23           | 27           | 24           | 22           | 23           | 26           | 23           | 23           | 24           |
| U                                     |              |              |              |              |              |              |              |              |              |              |              |              |              |              |              |              |              |              |              |              |

Table DR1 (c

| SN                                 | 05087         | 05088         | 05095   | 05106         | 05107         | 05123   | 05125   | 05126   | 05140        | 05141        | 06004         | 06007   | 06024         | 06037   | 06040   | 06041   | 06042   | 06044   | 06048   | 06049   |
|------------------------------------|---------------|---------------|---------|---------------|---------------|---------|---------|---------|--------------|--------------|---------------|---------|---------------|---------|---------|---------|---------|---------|---------|---------|
| WSU run                            | 0305(2)       | 0305(2)       | 0305(2) | 0405(3)       | 0405(3)       | 0305(3) | 0305(3) | 0305(3) | 0405(2)      | 0405(2)      | 0106(3)       | 0106(3) | 0106(3)       | 0106(4) | 0106(4) | 0106(4) | 0106(4) | 0106(4) | 0106(4) | 0106(4) |
| 7.5' Quad                          | Weddle Canyon | Weddle Canyon | Nile    | Weddle Canyon | Weddle Canyon | Nile    | Nile    | Nile    | Ianastash La | Ianastash La | Weddle Canyon | Nile    | Weddle Canyon | Nile    |
| UTM N*                             | 5176540       | 5176920       | 5179340 | 5173520       | 5173560       | 5182350 | 5184040 | 5183185 | 5196010      | 5196140      | 5177640       | 5184040 | 5175140       | 5180060 | 5182020 | 5181420 | 5181690 | 5183140 | 5184690 | 5184170 |
| UTM E*                             | 653640        | 653640        | 655280  | 659550        | 659570        | 655475  | 656880  | 656840  | 656620       | 656670       | 660290        | 658070  | 654630        | 654020  | 654920  | 655080  | 655180  | 654300  | 656740  | 656900  |
| Unnormalize                        |               |               |         |               |               |         |         |         |              |              |               |         |               |         |         |         |         |         |         |         |
| SiO2                               | 53.48         | 53.49         | 52.79   | 53.40         | 53.45         | 53.40   | 53.55   | 53.24   | 53.69        | 53.74        | 53.67         | 53.41   | 53.03         | 53.10   | 53.06   | 53.02   | 52.91   | 53.36   | 53.03   | 52.97   |
| Al2O3                              | 13.85         | 13.81         | 13.57   | 13.71         | 13.61         | 14.11   | 13.83   | 13.84   | 14.06        | 13.61        | 13.95         | 13.80   | 13.73         | 13.83   | 13.84   | 13.81   | 13.71   | 13.79   | 13.67   | 13.78   |
| TiO2                               | 1.916         | 1.946         | 1.893   | 1.995         | 2.017         | 1.932   | 1.910   | 1.907   | 1.946        | 1.902        | 1.930         | 1.933   | 1.922         | 1.945   | 1.922   | 1.929   | 1.929   | 1.903   | 1.921   | 1.894   |
| FeO                                | 11.23         | 11.10         | 11.39   | 11.56         | 11.69         | 11.69   | 11.44   | 11.52   | 10.98        | 9.84         | 11.90         | 11.68   | 11.76         | 11.31   | 11.49   | 11.71   | 11.00   | 11.74   | 11.57   | 11.28   |
| MnO                                | 0.209         | 0.203         | 0.205   | 0.203         | 0.205         | 0.208   | 0.207   | 0.209   | 0.210        | 0.212        | 0.209         | 0.208   | 0.205         | 0.205   | 0.201   | 0.205   | 0.201   | 0.209   | 0.208   | 0.207   |
| CaO                                | 8.63          | 8.63          | 8.51    | 8.19          | 8.08          | 8.82    | 8.66    | 8.63    | 8.63         | 8.89         | 8.51          | 8.50    | 8.53          | 8.57    | 8.48    | 8.53    | 8.58    | 8.57    | 8.44    | 8.50    |
| MgO                                | 4.53          | 4.52          | 4.67    | 4.39          | 4.32          | 4.78    | 4.60    | 4.49    | 4.40         | 4.43         | 4.81          | 4.69    | 4.66          | 4.44    | 4.27    | 4.42    | 4.20    | 4.85    | 4.65    | 4.78    |
| K2O                                | 1.27          | 1.34          | 1.17    | 1.36          | 1.35          | 1.16    | 1.23    | 1.15    | 1.24         | 1.23         | 1.17          | 1.23    | 1.14          | 1.24    | 1.07    | 1.05    | 1.22    | 1.26    | 1.17    | 1.22    |
| Na2O                               | 2.86          | 2.88          | 2.84    | 2.97          | 2.98          | 2.89    | 2.87    | 2.90    | 2.89         | 2.91         | 2.93          | 2.90    | 2.79          | 2.85    | 2.73    | 2.72    | 2.78    | 2.79    | 2.89    | 2.83    |
| P2O5                               | 0.284         | 0.292         | 0.280   | 0.318         | 0.329         | 0.282   | 0.294   | 0.283   | 0.295        | 0.284        | 0.284         | 0.288   | 0.286         | 0.288   | 0.287   | 0.315   | 0.292   | 0.279   | 0.285   | 0.288   |
| analysis tota                      | 98.26         | 98.20         | 97.31   | 98.09         | 98.04         | 99.27   | 98.60   | 98.17   | 98.35        | 97.95        | 99.36         | 98.64   | 98.05         | 97.78   | 97.34   | 97.72   | 96.82   | 98.75   | 97.84   | 97.73   |
| Normalized I                       |               |               |         |               |               |         |         |         |              |              |               |         |               |         |         |         |         |         |         |         |
| SiO2                               | 54.43         | 54.47         | 54.24   | 54.44         | 54.52         | 53.79   | 54.31   | 54.23   | 54.59        | 54.86        | 54.01         | 54.15   | 54.08         | 54.30   | 54.51   | 54.26   | 54.64   | 54.03   | 54.20   | 54.19   |
| Al2O3                              | 14.10         | 14.06         | 13.95   | 13.98         | 13.89         | 14.21   | 14.03   | 14.10   | 14.30        | 14.82        | 14.04         | 13.99   | 14.00         | 14.14   | 14.21   | 14.14   | 14.16   | 13.96   | 13.97   | 14.09   |
| TiO2                               | 1.950         | 1.982         | 1.945   | 2.034         | 2.057         | 1.946   | 1.938   | 1.943   | 1.978        | 1.942        | 1.943         | 1.960   | 1.960         | 1.990   | 1.974   | 1.974   | 1.992   | 1.927   | 1.963   | 1.938   |
| FeO*                               | 11.43         | 11.30         | 11.70   | 11.78         | 11.93         | 11.78   | 11.60   | 11.73   | 11.17        | 10.05        | 11.98         | 11.84   | 12.00         | 11.56   | 11.80   | 11.99   | 11.36   | 11.89   | 11.82   | 11.54   |
| MnO                                | 0.212         | 0.206         | 0.211   | 0.207         | 0.209         | 0.210   | 0.210   | 0.212   | 0.213        | 0.217        | 0.211         | 0.210   | 0.209         | 0.210   | 0.206   | 0.209   | 0.207   | 0.212   | 0.213   | 0.211   |
| CaO                                | 8.78          | 8.79          | 8.75    | 8.35          | 8.24          | 8.89    | 8.79    | 8.80    | 8.78         | 9.08         | 8.57          | 8.62    | 8.70          | 8.77    | 8.71    | 8.73    | 8.86    | 8.68    | 8.63    | 8.69    |
| MgO                                | 4.61          | 4.60          | 4.80    | 4.48          | 4.41          | 4.81    | 4.67    | 4.57    | 4.47         | 4.52         | 4.84          | 4.76    | 4.76          | 4.54    | 4.39    | 4.53    | 4.34    | 4.92    | 4.75    | 4.89    |
| K2O                                | 1.29          | 1.37          | 1.20    | 1.38          | 1.38          | 1.17    | 1.24    | 1.17    | 1.27         | 1.26         | 1.18          | 1.24    | 1.16          | 1.27    | 1.09    | 1.07    | 1.26    | 1.28    | 1.20    | 1.24    |
| Na2O                               | 2.92          | 2.93          | 2.92    | 3.03          | 3.04          | 2.91    | 2.91    | 2.96    | 2.94         | 2.97         | 2.95          | 2.94    | 2.84          | 2.91    | 2.81    | 2.78    | 2.87    | 2.82    | 2.95    | 2.89    |
| P2O5                               | 0.289         | 0.297         | 0.288   | 0.324         | 0.336         | 0.284   | 0.298   | 0.289   | 0.300        | 0.290        | 0.285         | 0.292   | 0.291         | 0.294   | 0.294   | 0.323   | 0.302   | 0.283   | 0.292   | 0.295   |
| analysis total                     | 100.00        | 100.00        | 100.00  | 100.00        | 100.00        | 100.00  | 100.00  | 100.00  | 100.00       | 100.00       | 100.00        | 100.00  | 100.00        | 100.00  | 100.00  | 100.00  | 100.00  | 100.00  | 100.00  | 100.00  |
| Unnormalize                        |               |               |         |               |               |         |         |         |              |              |               |         |               |         |         |         |         |         |         |         |
| Ni                                 | 17            | 17            | 17      | 13            | 11            | 17      | 18      | 17      | 15           | 20           | 18            | 18      | 20            | 12      | 8       | 9       | 10      | 11      | 10      | 10      |
| Cr                                 | 25            | 26            | 25      | 21            | 19            | 28      | 26      | 26      | 22           | 27           | 26            | 25      | 23            | 25      | 24      | 24      | 23      | 25      | 25      | 25      |
| Sc                                 | 39            | 38            | 36      | 37            | 36            | 39      | 38      | 38      | 38           | 38           | 38            | 38      | 38            | 37      | 37      | 38      | 37      | 38      | 37      | 37      |
| V                                  | 343           | 346           | 338     | 344           | 345           | 349     | 341     | 339     | 343          | 333          | 340           | 338     | 339           | 346     | 348     | 377     | 344     | 342     | 339     | 337     |
| Ba                                 | 534           | 468           | 436     | 501           | 512           | 463     | 479     | 493     | 513          | 500          | 463           | 465     | 434           | 460     | 511     | 468     | 555     | 450     | 463     | 463     |
| Rb                                 | 29            | 29            | 26      | 32            | 32            | 25      | 28      | 27      | 28           | 25           | 29            | 29      | 25            | 27      | 26      | 26      | 28      | 27      | 28      | 26      |
| Sr                                 | 322           | 319           | 314     | 313           | 314           | 327     | 322     | 323     | 330          | 337          | 312           | 313     | 311           | 318     | 315     | 312     | 318     | 313     | 311     | 312     |
| Zr                                 | 158           | 161           | 156     | 160           | 163           | 159     | 157     | 157     | 159          | 154          | 154           | 155     | 153           | 155     | 153     | 154     | 154     | 152     | 153     | 150     |
| Y                                  | 32            | 34            | 32      | 35            | 35            | 35      | 33      | 34      | 35           | 34           | 31            | 32      | 30            | 31      | 32      | 34      | 31      | 31      | 31      | 30      |
| Nb                                 | 11.1          | 11.5          | 11.9    | 11.1          | 11.3          | 10.9    | 11.2    | 10.9    | 11.5         | 10.9         | 10.6          | 10.7    | 10.0          | 10.1    | 10.5    | 10.9    | 9.7     | 10.7    | 10.3    | 10.3    |
| Ga                                 | 21            | 22            | 21      | 22            | 21            | 23      | 22      | 20      | 21           | 23           | 22            | 22      | 21            | 22      | 20      | 21      | 21      | 21      | 22      | 22      |
| Cu                                 | 26            | 28            | 29      | 22            | 21            | 26      | 28      | 27      | 25           | 25           | 27            | 26      | 26            | 26      | 26      | 27      | 25      | 25      | 27      | 26      |
| Zn                                 | 114           | 115           | 113     | 118           | 123           | 112     | 113     | 115     | 117          | 117          | 119           | 117     | 118           | 119     | 120     | 122     | 119     | 114     | 119     | 117     |
| Pb                                 | 3             | 3             | 4       | 6             | 8             | 3       | 5       | 3       | 5            | 5            | 7             | 7       | 7             | 8       | 8       | 6       | 6       | 7       | 7       | 6       |
| La                                 | 19            | 23            | 17      | 22            | 22            | 23      | 21      | 20      | 21           | 18           | 17            | 13      | 21            | 18      | 18      | 18      | 17      | 19      | 19      | 16      |
| Ce                                 | 44            | 45            | 40      | 44            | 44            | 38      | 44      | 42      | 43           | 46           | 46            | 40      | 41            | 42      | 43      | 41      | 41      | 46      | 44      | 45      |
| Th                                 | 0             | 1             | 1       | 3             | 3             | 2       | 1       | 0       | 2            | 3            | 2             | 3       | 2             | 3       | 3       | 4       | 4       | 3       | 3       | 3       |
| Nd                                 | 23            | 26            | 24      | 23            | 25            | 25      | 25      | 26      | 24           | 26           | 26            | 23      | 25            | 23      | 22      | 24      | 24      | 22      | 23      | 23      |
| U                                  |               |               | 1       |               |               | 0       | 0       | 0       |              |              |               |         |               |         |         |         |         |         |         |         |
| Unnormalized Trace Elements (ppm): |               |               |         |               |               |         |         |         |              |              |               |         |               |         |         |         |         |         |         |         |

Table DR1 (c

| MC             |                                       |               |               |              |              |              |               |               |              |              |                                    |              |              |              |              |              |                |                |              |              |
|----------------|---------------------------------------|---------------|---------------|--------------|--------------|--------------|---------------|---------------|--------------|--------------|------------------------------------|--------------|--------------|--------------|--------------|--------------|----------------|----------------|--------------|--------------|
| SN             | 06052                                 | 06056         | 06057         | 06063        | 06071        | 06072        | 06093         | 06096         | 06098        | 06101        | 06114                              | 06116        | 06155        | 07003        | 07004        | 07012        | 07030          | 08013          | 08020        | 08024        |
| WSU run        | 0106(4)                               | 0306(2)       | 0106(4)       | 0106(4)      | 0206         | 0206         | 0206          | 0206          | 0206         | 0306(1)      | 0306(1)                            | 0306(1)      | 0306(1)      | 0107(3)      | 0107(3)      | 0107(3)      | 0207           | 0108(3)        | 0108(2)      | 0108(2)      |
| 7.5' Quad      | Nile                                  | Ianastash Lak | Ianastash Lak | Nile         | Nile         | Nile         | Ianastash Lak | Ianastash Lak | Cliffdell    | Nile         | Nile                               | Nile         | Nile         | Cliffdell    | Cliffdell    | Cliffdell    | Veddle Canyons | Veddle Canyons | Tieton       | Tieton       |
| UTM N*         | 5183570                               | 5193140       | 5194950       | 5189840      | 5179470      | 5179380      | 5193920       | 5195300       | 5205530      | 5182100      | 5188180                            | 5187860      | 5190400      | 5202060      | 5201940      | 5203200      | 5177870        | 5178000        | 5177960      | 5177360      |
| UTM E*         | 658330                                | 653000        | 655220        | 657680       | 654260       | 654430       | 655890        | 655590        | 645100       | 655230       | 657740                             | 658230       | 657140       | 646710       | 646800       | 645340       | 656090         | 662120         | 668760       | 665520       |
| Unnormalize    |                                       |               |               |              |              |              |               |               |              |              |                                    |              |              |              |              |              |                |                |              |              |
| SiO2           | 52.96                                 | 54.43         | 54.08         | 53.67        | 53.59        | 53.47        | 53.42         | 52.96         | 53.17        | 53.83        | 54.00                              | 54.53        | 53.89        | 53.53        | 53.22        | 52.87        | 52.97          | 53.54          | 52.88        | 52.39        |
| Al2O3          | 13.63                                 | 14.15         | 14.20         | 13.99        | 13.67        | 13.72        | 13.77         | 13.72         | 13.72        | 13.71        | 14.32                              | 14.30        | 13.88        | 13.82        | 13.74        | 13.66        | 13.81          | 14.06          | 13.70        | 13.63        |
| TiO2           | 1.912                                 | 1.950         | 1.968         | 1.922        | 2.025        | 2.025        | 1.917         | 1.906         | 1.924        | 2.036        | 1.964                              | 1.996        | 1.949        | 1.939        | 1.918        | 1.878        | 1.908          | 1.903          | 1.953        | 1.907        |
| FeO            | 11.67                                 | 11.59         | 10.23         | 10.92        | 12.21        | 11.94        | 11.92         | 11.72         | 12.17        | 12.03        | 11.18                              | 11.04        | 11.72        | 11.66        | 11.91        | 11.46        | 11.94          | 11.34          | 11.86        | 11.75        |
| MnO            | 0.210                                 | 0.194         | 0.190         | 0.206        | 0.210        | 0.208        | 0.208         | 0.208         | 0.213        | 0.209        | 0.209                              | 0.202        | 0.212        | 0.213        | 0.213        | 0.207        | 0.207          | 0.204          | 0.208        | 0.206        |
| CaO            | 8.42                                  | 8.20          | 8.64          | 8.58         | 8.12         | 8.21         | 8.45          | 8.43          | 8.43         | 8.15         | 8.74                               | 8.68         | 8.53         | 8.56         | 8.54         | 8.64         | 8.48           | 8.64           | 8.33         | 8.42         |
| MgO            | 4.82                                  | 4.16          | 4.47          | 4.66         | 4.39         | 4.39         | 4.67          | 4.73          | 4.76         | 4.42         | 4.30                               | 4.45         | 4.73         | 4.56         | 4.66         | 4.52         | 4.78           | 4.80           | 4.60         | 4.73         |
| K2O            | 1.12                                  | 1.07          | 1.32          | 1.23         | 1.35         | 1.30         | 1.17          | 1.26          | 1.18         | 1.32         | 1.14                               | 1.30         | 1.17         | 1.21         | 1.20         | 1.15         | 1.10           | 1.27           | 1.19         | 1.14         |
| Na2O           | 2.93                                  | 2.64          | 2.91          | 2.91         | 3.01         | 2.98         | 2.93          | 2.91          | 2.95         | 3.00         | 2.98                               | 2.98         | 2.96         | 2.96         | 2.91         | 2.93         | 2.87           | 2.98           | 2.92         | 2.83         |
| P2O5           | <u>0.285</u>                          | <u>0.276</u>  | <u>0.292</u>  | <u>0.285</u> | <u>0.325</u> | <u>0.324</u> | <u>0.287</u>  | <u>0.288</u>  | <u>0.289</u> | <u>0.332</u> | <u>0.308</u>                       | <u>0.301</u> | <u>0.293</u> | <u>0.294</u> | <u>0.292</u> | <u>0.279</u> | <u>0.289</u>   | <u>0.280</u>   | <u>0.303</u> | <u>0.282</u> |
| analysis tota  | 97.95                                 | 98.65         | 98.29         | 98.37        | 98.91        | 98.56        | 98.75         | 98.13         | 98.80        | 99.03        | 99.09                              | 99.77        | 99.35        | 98.69        | 98.62        | 97.54        | 98.46          | 98.96          | 97.96        | 97.29        |
| Normalized I   | Normalized Major Elements (Weight %): |               |               |              |              |              |               |               |              |              |                                    |              |              |              |              |              |                |                |              |              |
| SiO2           | 54.07                                 | 55.18         | 55.02         | 54.56        | 54.18        | 54.26        | 54.09         | 53.96         | 53.82        | 54.35        | 54.49                              | 54.65        | 54.25        | 54.24        | 53.97        | 54.21        | 53.79          | 54.11          | 53.98        | 53.85        |
| Al2O3          | 13.91                                 | 14.34         | 14.44         | 14.22        | 13.82        | 13.92        | 13.94         | 13.98         | 13.88        | 13.84        | 14.45                              | 14.33        | 13.98        | 14.01        | 13.93        | 14.01        | 14.03          | 14.21          | 13.99        | 14.01        |
| TiO2           | 1.952                                 | 1.977         | 2.002         | 1.954        | 2.047        | 2.055        | 1.942         | 1.943         | 1.948        | 2.056        | 1.982                              | 2.001        | 1.962        | 1.965        | 1.945        | 1.925        | 1.937          | 1.923          | 1.993        | 1.960        |
| FeO*           | 11.91                                 | 11.74         | 10.41         | 11.10        | 12.35        | 12.11        | 12.07         | 11.94         | 12.31        | 12.15        | 11.29                              | 11.06        | 11.80        | 11.81        | 12.07        | 11.75        | 12.12          | 11.46          | 12.10        | 12.08        |
| MnO            | 0.215                                 | 0.197         | 0.194         | 0.209        | 0.212        | 0.211        | 0.211         | 0.212         | 0.215        | 0.211        | 0.211                              | 0.203        | 0.213        | 0.215        | 0.216        | 0.213        | 0.210          | 0.206          | 0.213        | 0.212        |
| CaO            | 8.60                                  | 8.32          | 8.79          | 8.73         | 8.21         | 8.33         | 8.56          | 8.60          | 8.54         | 8.23         | 8.82                               | 8.70         | 8.59         | 8.67         | 8.66         | 8.86         | 8.62           | 8.73           | 8.50         | 8.66         |
| MgO            | 4.92                                  | 4.21          | 4.54          | 4.73         | 4.44         | 4.45         | 4.73          | 4.82          | 4.81         | 4.46         | 4.34                               | 4.46         | 4.76         | 4.62         | 4.63         | 4.63         | 4.85           | 4.85           | 4.70         | 4.86         |
| K2O            | 1.14                                  | 1.08          | 1.34          | 1.25         | 1.37         | 1.32         | 1.19          | 1.28          | 1.20         | 1.34         | 1.15                               | 1.30         | 1.18         | 1.22         | 1.21         | 1.18         | 1.12           | 1.28           | 1.21         | 1.17         |
| Na2O           | 3.00                                  | 2.67          | 2.96          | 2.96         | 3.05         | 3.02         | 2.96          | 2.96          | 2.98         | 3.03         | 2.96                               | 2.98         | 2.98         | 2.95         | 2.97         | 2.94         | 3.03           | 2.95           | 3.00         | 2.91         |
| P2O5           | <u>0.291</u>                          | <u>0.280</u>  | <u>0.297</u>  | <u>0.290</u> | <u>0.328</u> | <u>0.328</u> | <u>0.291</u>  | <u>0.293</u>  | <u>0.293</u> | <u>0.335</u> | <u>0.311</u>                       | <u>0.302</u> | <u>0.295</u> | <u>0.298</u> | <u>0.297</u> | <u>0.286</u> | 0.294          | <u>0.283</u>   | 0.309        | <u>0.290</u> |
| analysis total | 100.00                                | 100.00        | 100.00        | 100.00       | 100.00       | 100.00       | 100.00        | 100.00        | 100.00       | 100.00       | 100.00                             | 100.00       | 100.00       | 100.00       | 100.00       | 100.00       | 100.00         | 100.00         | 100.00       | 100.00       |
| Unnormalize    | Unnormalized Trace Elements (ppm):    |               |               |              |              |              |               |               |              |              | Unnormalized Trace Elements (ppm): |              |              |              |              |              |                |                |              |              |
| Ni             | 12                                    | 9             | 10            | 12           | 16           | 18           | 17            | 17            | 17           | 10           | 11                                 | 12           | 14           | 13           | 12           | 13           | 7              | 10             | 8            | R            |
| Cr             | 23                                    | 27            | 23            | 25           | 21           | 21           | 23            | 24            | 23           | 19           | 23                                 | 22           | 22           | 21           | 22           | 23           | 23             | 23             | 22           | 21           |
| Sc             | 38                                    | 37            | 39            | 38           | 37           | 37           | 38            | 36            | 37           | 37           | 39                                 | 37           | 37           | 38           | 39           | 37           | 37             | 38             | 35           | 36           |
| V              | 341                                   | 326           | 345           | 345          | 346          | 353          | 342           | 341           | 342          | 347          | 348                                | 345          | 343          | 339          | 336          | 333          | 336            | 339            | 334          | 336          |
| Ba             | 465                                   | 581           | 530           | 470          | 525          | 519          | 467           | 461           | 459          | 515          | 469                                | 482          | 480          | 463          | 464          | 472          | 460            | 459            | 473          | 444          |
| Rb             | 27                                    | 28            | 28            | 28           | 32           | 31           | 28            | 29            | 28           | 33           | 27                                 | 29           | 28           | 30           | 28           | 29           | 28             | 26             | 29           | 27           |
| Sr             | 306                                   | 329           | 323           | 316          | 311          | 312          | 307           | 304           | 304          | 321          | 331                                | 329          | 323          | 320          | 315          | 321          | 317            | 319            | 315          | 311          |
| Zr             | 151                                   | 161           | 159           | 154          | 160          | 159          | 153           | 151           | 163          | 159          | 159                                | 163          | 159          | 158          | 157          | 155          | 157            | 157            | 158          | 157          |
| Y              | 31                                    | 37            | 34            | 31           | 35           | 35           | 34            | 32            | 33           | 33           | 35                                 | 34           | 34           | 33           | 33           | 32           | 33             | 32             | 33           | 32           |
| Nb             | 10.2                                  | 10.9          | 10.5          | 10.6         | 10.8         | 11.8         | 10.5          | 10.3          | 10.8         | 10.4         | 10.0                               | 10.8         | 10.9         | 10.1         | 10.7         | 9.9          | 9.4            | 10.1           | 9.8          | 9.7          |
| Ga             | 20                                    | 21            | 24            | 21           | 21           | 21           | 20            | 20            | 20           | 21           | 20                                 | 22           | 21           | 21           | 21           | 21           | 19             | 20             | 19           | 21           |
| Cu             | 25                                    | 26            | 26            | 26           | 23           | 25           | 27            | 27            | 25           | 21           | 26                                 | 24           | 26           | 27           | 26           | 27           | 27             | 28             | 25           | 27           |
| Zn             | 118                                   | 122           | 122           | 117          | 120          | 120          | 116           | 114           | 113          | 121          | 120                                | 122          | 118          | 117          | 114          | 115          | 118            | 121            | 121          | 122          |
| Pb             | 8                                     | 6             | 7             | 7            | 8            | 7            | 6             | 7             | 5            | 6            | 6                                  | 5            | 6            | 6            | 5            | 4            | 5              | 6              | 7            | 6            |
| La             | 19                                    | 22            | 20            | 18           | 20           | 23           | 23            | 21            | 23           | 20           | 20                                 | 18           | 19           | 18           | 17           | 18           | 20             | 24             | 17           | 21           |
| Ce             | 40                                    | 38            | 43            | 39           | 47           | 41           | 44            | 42            | 43           | 45           | 39                                 | 39           | 46           | 41           | 44           | 39           | 44             | 41             | 42           | 44           |
| Th             | 3                                     | 5             | 3             | 4            | 5            | 4            | 3             | 2             | 4            | 5            | 4                                  | 4            | 4            | 6            | 4            | 6            | 4              | 4              | 4            | 4            |
| Nd             | 21                                    | 28            | 26            | 21           | 27           | 24           | 25            | 24            | 24           | 26           | 24                                 | 23           | 24           | 25           | 23           | 21           |                | 22             | 26           | 26           |
| U              |                                       |               |               |              |              |              |               |               |              |              |                                    |              |              |              |              |              |                |                |              |              |

Table DR1 (c

|                                       |              |              |              |         | ORTLEY                                |              |              |              |              |              |              |              |              |              |                |              |              |              |                |
|---------------------------------------|--------------|--------------|--------------|---------|---------------------------------------|--------------|--------------|--------------|--------------|--------------|--------------|--------------|--------------|--------------|----------------|--------------|--------------|--------------|----------------|
| SN                                    | 08028        | 08063        |              |         | 94086                                 | 96239        | 99019        | 99023        | 02186        | 03005        | '04080       | 04089        | 04090        | 04091        | 04119          | '04138       | 04139        | 04164        | 04217          |
| WSU run                               | 0108(2)      | 0108(2)      |              |         | 0495                                  | 0197         | 0799         | 0799         | 0107(3)      | 0204         | 0404(1)      | 0404(1)      | 0405(4)      | 0404(1)      | 0404(2)        | 0404(2)      | 0404(2)      | 0405(4)      | 0504(2)        |
| 7.5' Quad                             | Nile         | Frost Mtn    |              |         | Old Scab Mtn                          | Old Scab Mtn | Cliffdell    | Cliffdell    | Cliffdell    | Cliffdell    | Nile 7.5'    | Veddle Canyo | Veddle Canyo | Veddle Canyo | clanastash Lak | Nile         | Veddle Canyo | Veddle Canyo | clanastash Lak |
| UTM N*                                | 5181220      | 5209360      |              |         | 5195810                               | 5199750      | 5201970      | 5204730      | 5201940      | 5203410      | 5182620      | 5176390      | 5177740      | 5177450      | 5194320        | 5187320      | 5173000      | 5172740      | 5194800        |
| UTM E*                                | 660200       | 657960       |              |         | 639730                                | 638900       | 646830       | 646000       | 646820       | 644130       | 659550       | 653550       | 659700       | 660560       | 656550         | 657930       | 659000       | 658640       | 655500         |
| Unnormalize                           |              |              |              |         |                                       |              |              |              |              |              |              |              |              |              |                |              |              |              |                |
| SiO2                                  | 52.69        | 52.86        |              |         | 54.58                                 | 52.73        | 57.51        | 55.76        | 56.60        | 54.71        | 53.53        | 56.91        | 56.32        | 56.57        | 54.71          | 55.69        | 55.79        | 55.53        | 54.94          |
| Al2O3                                 | 13.72        | 13.81        |              |         | 13.65                                 | 13.46        | 14.94        | 14.24        | 14.69        | 13.97        | 13.74        | 13.90        | 13.80        | 13.80        | 14.24          | 13.59        | 13.64        | 13.37        | 13.91          |
| TiO2                                  | 1.914        | 1.929        |              |         | 1.981                                 | 1.961        | 2.101        | 2.000        | 2.079        | 2.018        | 1.970        | 2.021        | 1.996        | 2.046        | 2.056          | 2.021        | 1.973        | 2.026        | 2.000          |
| FeO                                   | 11.58        | 11.64        |              |         | 11.51                                 | 11.23        | 8.44         | 10.48        | 8.30         | 11.57        | 12.72        | 10.68        | 10.33        | 11.25        | 11.49          | 11.33        | 11.43        | 10.65        | 11.25          |
| MnO                                   | 0.207        | 0.210        |              |         | 0.203                                 | 0.190        | 0.154        | 0.153        | 0.146        | 0.323        | 0.362        | 0.203        | 0.202        | 0.195        | 0.195          | 0.205        | 0.191        | 0.186        | 0.214          |
| CaO                                   | 8.50         | 8.56         |              |         | 7.50                                  | 7.78         | 7.77         | 7.34         | 7.54         | 7.76         | 7.67         | 7.05         | 6.80         | 6.94         | 7.83           | 7.06         | 7.09         | 6.75         | 7.63           |
| MgO                                   | 4.71         | 4.65         |              |         | 3.48                                  | 3.48         | 3.38         | 3.62         | 3.19         | 3.54         | 3.40         | 3.29         | 3.29         | 3.25         | 3.52           | 3.24         | 3.37         | 3.20         | 3.51           |
| K2O                                   | 1.19         | 1.19         | McCOY CANYON |         | 1.55                                  | 1.57         | 1.70         | 1.56         | 1.63         | 1.67         | 1.67         | 2.15         | 1.92         | 1.93         | 1.49           | 2.01         | 1.81         | 2.06         | 1.71           |
| Na2O                                  | 2.86         | 2.87         | 82           |         | 3.23                                  | 3.16         | 3.66         | 3.43         | 3.24         | 3.13         | 3.06         | 3.15         | 3.11         | 3.25         | 3.16           | 3.07         | 3.14         | 3.01         | 3.12           |
| P2O5                                  | <u>0.283</u> | <u>0.307</u> | average      | std dev | <u>0.327</u>                          | <u>0.322</u> | <u>0.355</u> | <u>0.340</u> | <u>0.343</u> | <u>0.343</u> | <u>0.376</u> | <u>0.375</u> | <u>0.357</u> | <u>0.378</u> | <u>0.353</u>   | <u>0.424</u> | <u>0.335</u> | <u>0.333</u> | <u>0.352</u>   |
| analysis tota                         | 97.65        | 98.01        | 98.65        | 0.72    | 98.011                                | 95.88        | 100.01       | 98.93        | 97.77        | 99.03        | 98.49        | 99.74        | 98.12        | 99.61        | 99.05          | 98.63        | 98.77        | 97.12        | 98.65          |
| Normalized Major Elements (Weight %): |              |              |              |         |                                       |              |              |              |              |              |              |              |              |              |                |              |              |              |                |
| Normalized I                          |              |              |              |         | Normalized Major Elements (Weight %): |              |              |              |              |              |              |              |              |              |                |              |              |              |                |
| SiO2                                  | 53.95        | 53.93        | 54.24        | 0.36    | 55.69                                 | 54.99        | 57.51        | 56.36        | 57.89        | 55.24        | 54.35        | 57.06        | 57.39        | 56.79        | 55.23          | 56.47        | 56.49        | 57.18        | 55.69          |
| Al2O3                                 | 14.05        | 14.09        | 14.09        | 0.20    | 13.93                                 | 14.04        | 14.94        | 14.39        | 15.02        | 14.10        | 13.95        | 13.94        | 14.06        | 13.85        | 14.38          | 13.78        | 13.81        | 13.77        | 14.10          |
| TiO2                                  | 1.960        | 1.969        | 1.963        | 0.035   | 2.021                                 | 2.045        | 2.101        | 2.022        | 2.126        | 2.037        | 2.000        | 2.027        | 2.034        | 2.054        | 2.076          | 2.049        | 1.997        | 2.086        | 2.028          |
| FeO*                                  | 11.86        | 11.88        | 11.71        | 0.53    | 11.74                                 | 11.71        | 8.44         | 10.60        | 8.49         | 11.69        | 12.91        | 10.71        | 10.53        | 11.30        | 11.60          | 11.48        | 11.57        | 10.96        | 11.41          |
| MnO                                   | 0.212        | 0.214        | 0.210        | 0.007   | 0.207                                 | 0.198        | 0.154        | 0.155        | 0.149        | 0.326        | 0.368        | 0.204        | 0.205        | 0.196        | 0.197          | 0.208        | 0.193        | 0.192        | 0.217          |
| CaO                                   | 8.71         | 8.73         | 8.65         | 0.20    | 7.65                                  | 8.11         | 7.77         | 7.42         | 7.72         | 7.83         | 7.79         | 7.07         | 6.93         | 6.97         | 7.91           | 7.16         | 7.18         | 6.95         | 7.74           |
| MgO                                   | 4.82         | 4.74         | 4.65         | 0.17    | 3.55                                  | 3.63         | 3.38         | 3.66         | 3.27         | 3.58         | 3.45         | 3.30         | 3.36         | 3.26         | 3.55           | 3.28         | 3.41         | 3.30         | 3.56           |
| K2O                                   | 1.22         | 1.21         | 1.25         | 0.10    | 1.58                                  | 1.64         | 1.70         | 1.58         | 1.67         | 1.69         | 1.69         | 2.15         | 1.96         | 1.94         | 1.51           | 2.03         | 1.83         | 3.10         | 1.74           |
| Na2O                                  | 2.93         | 2.92         | 2.94         | 0.07    | 3.30                                  | 3.30         | 3.66         | 3.47         | 3.32         | 3.16         | 3.10         | 3.16         | 3.17         | 3.27         | 3.19           | 3.11         | 3.18         | 2.12         | 3.17           |
| P2O5                                  | <u>0.290</u> | <u>0.313</u> | 0.301        | 0.014   | <u>0.334</u>                          | <u>0.336</u> | <u>0.355</u> | <u>0.344</u> | <u>0.351</u> | <u>0.346</u> | <u>0.382</u> | <u>0.376</u> | <u>0.364</u> | <u>0.379</u> | <u>0.357</u>   | <u>0.430</u> | <u>0.339</u> | <u>0.343</u> | <u>0.357</u>   |
| analysis total                        | 100.00       | 100.00       |              |         | 100.00                                | 100.00       | 100.00       | 100.00       | 100.00       | 100.00       | 100.00       | 100.00       | 100.00       | 100.00       | 100.00         | 100.00       | 100.00       | 100.00       | 100.00         |
| Unnormalize                           |              |              |              |         |                                       |              |              |              |              |              |              |              |              |              |                |              |              |              |                |
| Ni                                    | 10           | 10           | 13           | 4       | 9                                     | 5            | 11           | 13           | 12           | 15           | 20           | 9            | 9            | 6            | 18             | 10           | 10           | 9            | 18             |
| Cr                                    | 22           | 22           | 24           | 4       | 19                                    | 26           | 30           | 27           | 13           | 8            | 13           | 4            | 6            | 4            | 11             | 5            | 2            | 4            | 13             |
| Sc                                    | 37           | 36           | 37           | 2       | 30                                    | 31           | 44           | 41           | 35           | 33           | 34           | 31           | 31           | 31           | 35             | 31           | 31           | 31           | 35             |
| V                                     | 334          | 339          | 342          | 8       | 351                                   | 349          | 376          | 357          | 363          | 359          | 353          | 302          | 300          | 300          | 367            | 294          | 327          | 335          | 362            |
| Ba                                    | 462          | 486          | 485          | 36      | 607                                   | 788          | 799          | 633          | 793          | 685          | 688          | 757          | 781          | 754          | 714            | 898          | 746          | 733          | 663            |
| Rb                                    | 28           | 27           | 29           | 3       | 43                                    | 46           | 50           | 41           | 48           | 45           | 45           | 55           | 51           | 54           | 40             | 55           | 51           | 54           | 42             |
| Sr                                    | 313          | 319          | 317          | 8       | 323                                   | 320          | 350          | 319          | 354          | 335          | 326          | 333          | 338          | 329          | 333            | 332          | 312          | 305          | 303            |
| Zr                                    | 155          | 156          | 156          | 4       | 168                                   | 164          | 176          | 169          | 181          | 176          | 171          | 192          | 193          | 191          | 174            | 188          | 174          | 178          | 163            |
| Y                                     | 32           | 33           | 33           | 2       | 36                                    | 34           | 38           | 36           | 38           | 36           | 35           | 36           | 37           | 35           | 37             | 36           | 34           | 35           | 35             |
| Nb                                    | 10.0         | 9.7          | 11.0         | 0.9     | 12.6                                  | 12.1         | 13.8         | 12.6         | 10.5         | 11.4         | 12.5         | 13.9         | 13.6         | 15.0         | 13.1           | 13.6         | 12.0         | 12.4         | 11.8           |
| Ga                                    | 20           | 21           | 21           | 1       | 20                                    | 21           | 23           | 22           | 22           | 22           | 20           | 22           | 20           | 23           | 20             | 24           | 21           | 23           | 21             |
| Cu                                    | 27           | 28           | 24           | 4       | 29                                    | 22           | 47           | 29           | 30           | 29           | 24           | 4            | 14           | 4            | 27             | 3            | 8            | 18           | 28             |
| Zn                                    | 121          | 118          | 117          | 3       | 125                                   | 118          | 127          | 120          | 143          | 124          | 123          | 124          | 126          | 125          | 124            | 122          | 118          | 119          | 119            |
| Pb                                    | 7            | 6            | 6            | 1       | 5                                     | 9            | 8            | 8            | 7            | 11           | 6            | 8            | 10           | 9            | 10             | 10           | 9            | 9            | 8              |
| La                                    | 20           | 22           | 19           | 3       | 11                                    | 22           | 41           | 27           | 28           | 20           | 19           | 27           | 28           | 27           | 21             | 28           | 25           | 26           | 19             |
| Ce                                    | 43           | 44           | 42           | 4       | 42                                    | 45           | 51           | 42           | 47           | 47           | 46           | 57           | 60           | 54           | 45             | 60           | 51           | 55           | 40             |
| Th                                    | 3            | 4            | 3            | 1       | 5                                     | 8            | 5            | 5            | 4            | 5            | 4            | 7            | 5            | 6            | 5              | 6            | 5            | 4            | 5              |
| Nd                                    | 23           | 24           | 24           | 2       |                                       |              |              |              | 24           |              | 28           | 30           | 29           | 31           | 27             | 35           | 28           | 29           | 26             |
| U                                     | 0            | 1            | 1            | 1       |                                       |              |              |              |              |              |              |              |              |              |                |              |              |              |                |

Table DR1 (c

|                |               |         |              |              |               |               |               |         |         |               |             |         |         |         |         |         |         |             |             |             |
|----------------|---------------|---------|--------------|--------------|---------------|---------------|---------------|---------|---------|---------------|-------------|---------|---------|---------|---------|---------|---------|-------------|-------------|-------------|
| O              |               |         |              |              |               |               |               |         |         |               |             |         |         |         |         |         |         |             |             |             |
| SN             | 04223         | 05085   | 05100        | 05101        | 05105         | 05117         | 05118         | 05127   | 05128   | 05144         | 06034       | 06039   | 06046   | 06073   | 06105   | 06115   | 06118   | 06143       | 07016       | 07017       |
| WSU run        | 0504(2)       | 0305(2) | 0305(2)      | 0305(2)      | 0405(3)       | 0405(3)       | 0405(3)       | 0305(3) | 0405(2) | 0405(2)       | 0106(4)     | 0106(4) | 0106(4) | 0206    | 0306(1) | 0306(1) | 0306(1) | 0306(1)     | 0107(3)     | 0107(3)     |
| 7.5' Quad      | Ianastash Lak | Nile    | Tieton Basin | Tieton Basin | Veddle Canyon | Veddle Canyon | Veddle Canyon | Nile    | Nile    | Ianastash Lak | Weeks Table | Nile    | Nile    | Nile    | Nile    | Nile    | Nile    | Weeks Table | Milk Canyon | Milk Canyon |
| UTM N*         | 5194160       | 5189860 | 5174820      | 5174820      | 5173480       | 5173460       | 5173250       | 5183310 | 5184920 | 5195000       | 5182040     | 5182520 | 5183200 | 5179580 | 5190060 | 5187860 | 5183260 | 5181810     | 5179970     | 5179850     |
| UTM E*         | 656240        | 657740  | 646140       | 646140       | 659520        | 659440        | 659510        | 656000  | 660120  | 655840        | 652520      | 655030  | 655490  | 656780  | 657700  | 658260  | 659140  | 650980      | 666520      | 666680      |
| Unnormalize    |               |         |              |              |               |               |               |         |         |               |             |         |         |         |         |         |         |             |             |             |
| SiO2           | 55.59         | 56.70   | 55.74        | 55.52        | 55.79         | 56.13         | 56.15         | 56.37   | 55.08   | 56.28         | 55.99       | 54.39   | 56.38   | 55.57   | 57.07   | 56.50   | 53.73   | 55.17       | 55.46       | 55.73       |
| Al2O3          | 14.08         | 13.76   | 13.73        | 13.53        | 13.76         | 13.74         | 13.64         | 13.89   | 14.58   | 14.51         | 13.88       | 13.79   | 13.88   | 13.55   | 13.94   | 13.83   | 14.30   | 14.12       | 13.50       | 13.36       |
| TiO2           | 2.027         | 1.991   | 1.945        | 1.937        | 1.955         | 1.976         | 1.949         | 2.043   | 2.025   | 2.080         | 2.015       | 1.979   | 1.997   | 1.974   | 2.050   | 2.009   | 2.052   | 2.030       | 1.999       | 2.052       |
| FeO            | 10.54         | 9.67    | 10.70        | 11.09        | 10.80         | 10.93         | 10.81         | 9.55    | 9.23    | 8.35          | 9.86        | 10.91   | 9.84    | 11.25   | 9.97    | 10.32   | 11.56   | 9.80        | 11.30       | 11.59       |
| MnO            | 0.193         | 0.177   | 0.184        | 0.189        | 0.184         | 0.186         | 0.188         | 0.176   | 0.135   | 0.154         | 0.182       | 0.211   | 0.191   | 0.189   | 0.175   | 0.194   | 0.190   | 0.393       | 0.189       | 0.186       |
| CaO            | 7.73          | 6.97    | 6.97         | 6.96         | 6.97          | 6.90          | 6.90          | 6.78    | 7.09    | 7.64          | 6.96        | 7.60    | 7.05    | 6.82    | 6.79    | 6.92    | 7.78    | 7.70        | 6.84        | 6.78        |
| MgO            | 3.54          | 3.30    | 3.34         | 3.32         | 3.41          | 3.38          | 3.37          | 3.16    | 3.14    | 3.49          | 3.34        | 3.57    | 3.37    | 3.29    | 3.23    | 3.33    | 3.55    | 3.49        | 3.28        | 3.24        |
| K2O            | 1.75          | 1.94    | 1.68         | 1.81         | 1.83          | 1.87          | 1.90          | 2.05    | 1.61    | 1.85          | 1.88        | 1.66    | 1.89    | 1.75    | 1.92    | 1.98    | 1.22    | 1.80        | 1.96        | 1.80        |
| Na2O           | 3.14          | 3.14    | 3.21         | 3.15         | 3.12          | 3.17          | 3.11          | 3.19    | 3.44    | 3.20          | 3.14        | 3.10    | 3.17    | 3.22    | 3.24    | 3.12    | 3.12    | 3.09        | 2.94        | 3.11        |
| P2O5           | 0.347         | 0.355   | 0.336        | 0.341        | 0.332         | 0.344         | 0.319         | 0.368   | 0.454   | 0.378         | 0.361       | 0.340   | 0.351   | 0.352   | 0.361   | 0.374   | 0.367   | 0.349       | 0.348       | 0.332       |
| analysis tota  | 98.94         | 98.00   | 97.83        | 97.85        | 98.15         | 98.63         | 98.33         | 97.57   | 96.78   | 97.93         | 97.61       | 97.55   | 98.11   | 97.97   | 98.76   | 98.57   | 97.87   | 97.94       | 97.83       | 98.17       |
| Normalized I   |               |         |              |              |               |               |               |         |         |               |             |         |         |         |         |         |         |             |             |             |
| SiO2           | 56.18         | 57.86   | 56.98        | 56.74        | 56.84         | 56.91         | 57.10         | 57.77   | 56.91   | 57.46         | 57.36       | 55.76   | 57.47   | 56.73   | 57.79   | 57.32   | 54.90   | 56.33       | 56.70       | 56.77       |
| Al2O3          | 14.23         | 14.04   | 14.03        | 13.82        | 14.02         | 13.93         | 13.87         | 14.24   | 15.06   | 14.82         | 14.22       | 14.13   | 14.14   | 13.83   | 14.12   | 14.03   | 14.61   | 14.41       | 13.81       | 13.60       |
| TiO2           | 2.048         | 2.031   | 1.989        | 1.980        | 1.992         | 2.004         | 1.982         | 2.094   | 2.093   | 2.124         | 2.065       | 2.029   | 2.036   | 2.015   | 2.076   | 2.039   | 2.096   | 2.073       | 2.043       | 2.090       |
| FeO*           | 10.65         | 9.87    | 10.93        | 11.33        | 11.01         | 11.08         | 10.99         | 9.79    | 9.53    | 8.53          | 10.10       | 11.19   | 10.03   | 11.48   | 10.10   | 10.47   | 11.81   | 10.00       | 11.55       | 11.81       |
| MnO            | 0.195         | 0.180   | 0.188        | 0.193        | 0.187         | 0.189         | 0.191         | 0.180   | 0.140   | 0.157         | 0.186       | 0.217   | 0.194   | 0.193   | 0.177   | 0.197   | 0.194   | 0.401       | 0.193       | 0.190       |
| CaO            | 7.81          | 7.11    | 7.12         | 7.12         | 7.10          | 7.00          | 7.02          | 6.95    | 7.33    | 7.80          | 7.13        | 7.79    | 7.18    | 6.97    | 6.87    | 7.02    | 7.95    | 7.87        | 6.99        | 6.90        |
| MgO            | 3.58          | 3.36    | 3.41         | 3.39         | 3.48          | 3.43          | 3.43          | 3.24    | 3.24    | 3.56          | 3.42        | 3.66    | 3.43    | 3.36    | 3.27    | 3.37    | 3.62    | 3.57        | 3.35        | 3.30        |
| K2O            | 1.77          | 1.98    | 3.28         | 3.22         | 3.18          | 1.90          | 1.94          | 2.10    | 1.67    | 1.89          | 1.93        | 1.70    | 1.93    | 1.79    | 1.95    | 2.01    | 1.25    | 1.84        | 2.01        | 1.83        |
| Na2O           | 3.17          | 3.20    | 1.72         | 1.85         | 1.87          | 3.22          | 3.16          | 3.27    | 3.56    | 3.27          | 3.21        | 3.18    | 3.23    | 3.28    | 3.28    | 3.16    | 3.19    | 3.15        | 3.00        | 3.17        |
| P2O5           | 0.351         | 0.362   | 0.343        | 0.349        | 0.338         | 0.349         | 0.324         | 0.377   | 0.469   | 0.386         | 0.370       | 0.348   | 0.358   | 0.359   | 0.366   | 0.379   | 0.375   | 0.356       | 0.356       | 0.338       |
| analysis total | 100.00        | 100.00  | 100.00       | 100.00       | 100.00        | 100.00        | 100.00        | 100.00  | 100.00  | 100.00        | 100.00      | 100.00  | 100.00  | 100.00  | 100.00  | 100.00  | 100.00  | 100.00      | 100.00      | 100.00      |
| Unnormalize    |               |         |              |              |               |               |               |         |         |               |             |         |         |         |         |         |         |             |             |             |
| Ni             | 20            | 12      | 14           | 13           | 11            | 9             | 7             | 13      | 20      | 20            | 5           | 13      | 7       | 12      | 7       | 7       | 8       | 7           | 7           | 6           |
| Cr             | 13            | 10      | 8            | 9            | 5             | 7             | 4             | 9       | 15      | 13            | 7           | 14      | 6       | 6       | 6       | 6       | 7       | 6           | 6           | 6           |
| Sc             | 34            | 32      | 32           | 30           | 30            | 31            | 31            | 31      | 35      | 35            | 31          | 35      | 32      | 32      | 30      | 31      | 31      | 31          | 31          | 31          |
| V              | 362           | 299     | 300          | 300          | 308           | 302           | 325           | 306     | 361     | 368           | 308         | 358     | 309     | 300     | 296     | 302     | 303     | 300         | 297         | 294         |
| Ba             | 696           | 752     | 753          | 693          | 746           | 725           | 731           | 789     | 684     | 865           | 772         | 655     | 725     | 722     | 898     | 736     | 797     | 803         | 809         | 814         |
| Rb             | 41            | 53      | 49           | 50           | 48            | 52            | 52            | 53      | 44      | 44            | 50          | 42      | 51      | 51      | 52      | 53      | 51      | 51          | 51          | 51          |
| Sr             | 312           | 344     | 335          | 325          | 325           | 329           | 312           | 344     | 339     | 353           | 344         | 318     | 335     | 320     | 347     | 336     | 341     | 342         | 343         | 344         |
| Zr             | 166           | 197     | 192          | 192          | 190           | 192           | 178           | 199     | 177     | 181           | 193         | 169     | 191     | 188     | 197     | 196     | 195     | 196         | 197         | 198         |
| Y              | 35            | 37      | 36           | 35           | 37            | 37            | 35            | 39      | 36      | 44            | 35          | 34      | 34      | 36      | 38      | 36      | 37      | 37          | 36          | 36          |
| Nb             | 12.3          | 13.4    | 13.2         | 12.5         | 13.2          | 12.7          | 11.5          | 12.6    | 11.9    | 12.5          | 11.9        | 11.0    | 12.2    | 13.0    | 12.5    | 12.2    | 12.5    | 12.5        | 12.5        | 12.5        |
| Ga             | 21            | 21      | 21           | 21           | 21            | 21            | 20            | 23      | 22      | 22            | 25          | 21      | 23      | 22      | 22      | 22      | 23      | 23          | 23          | 23          |
| Cu             | 29            | 14      | 14           | 12           | 15            | 13            | 16            | 13      | 32      | 31            | 13          | 32      | 13      | 13      | 12      | 12      | 13      | 13          | 12          | 11          |
| Zn             | 123           | 123     | 120          | 118          | 122           | 124           | 118           | 128     | 125     | 131           | 126         | 123     | 129     | 122     | 127     | 128     | 128     | 129         | 129         | 129         |
| Pb             | 9             | 8       | 7            | 7            | 10            | 11            | 10            | 7       | 8       | 9             | 11          | 10      | 10      | 10      | 9       | 10      | 10      | 10          | 10          | 10          |
| La             | 24            | 28      | 27           | 31           | 24            | 29            | 26            | 29      | 24      | 28            | 30          | 20      | 28      | 28      | 28      | 24      | 27      | 27          | 27          | 27          |
| Ce             | 50            | 58      | 60           | 58           | 56            | 56            | 50            | 59      | 48      | 55            | 63          | 44      | 55      | 56      | 60      | 56      | 58      | 59          | 59          | 60          |
| Th             | 5             | 4       | 3            | 4            | 5             | 4             | 5             | 4       | 4       | 4             | 5           | 3       | 5       | 6       | 7       | 7       | 7       | 7           | 8           | 8           |
| Nd             | 25            | 31      | 32           | 30           | 31            | 29            | 28            | 30      | 28      | 31            | 32          | 25      | 29      | 25      | 33      | 29      | 30      | 30          | 30          | 30          |
| U              |               | 0       |              |              |               |               |               | 0       |         |               |             | nd      |         |         |         |         |         |             | 0           |             |

Table DR1 (c

| SN             | 08015        | 08025        | 08026        | 08036        | 08065        | 08082        | 08083        | 09007        | 09013        | 09016        | 09064        | 09066        | 10030        | 10031        | 10049        | 10050        | 10061        | 10062        |       |       |
|----------------|--------------|--------------|--------------|--------------|--------------|--------------|--------------|--------------|--------------|--------------|--------------|--------------|--------------|--------------|--------------|--------------|--------------|--------------|-------|-------|
| WSU run        | 0108(2)      | 0108(2)      | 0108(3)      | 0108(2)      | 0108(2)      | 0108(3)      | 0108(3)      | 0109         | 0109         | 0109         | 0109(2)      | 0109(2)      | 0110PHA(3)   | 0110PHA(3)   | 0110PHA(3)   | 0110PHA(3)   | 0110PHA(3)   | 0110PHA(3)   |       |       |
| 7.5' Quad      | Veddle Canyo | Tieton       | Tieton       | Nile         | Frost Mtn    | Nile         | Nile         | Milk Canyon  | Milk Canyon  | Milk Canyon  | Veddle Canyo | eddle Canyo  | Tieton       | Tieton       | Tieton       | Veddle Canyo | eddle Canyo  | eddle Canyo  |       |       |
| UTM N*         | 5178670      | 5177240      | 5177320      | 5183340      | 5209360      | 5182320      | 5182600      | 5180570      | 5181280      | 5180600      | 5172840      | 5172830      | 5176454      | 5176454      | 5175460      | 5175200      | 5173060      | 5174800      |       |       |
| UTM E*         | 662100       | 663100       | 661970       | 662420       | 658000       | 662220       | 661900       | 665820       | 665300       | 665620       | 658900       | 658880       | 664622       | 664622       | 662990       | 662220       | 660160       | 661750       |       |       |
| Unnormalize    |              |              |              |              |              |              |              |              |              |              |              |              |              |              |              |              |              |              |       |       |
| SiO2           | 55.40        | 54.53        | 56.35        | 54.88        | 54.74        | 55.81        | 55.71        | 56.01        | 56.07        | 55.59        | 55.73        | 55.93        | 56.93        | 56.72        | 55.89        | 55.84        | 55.66        | 55.50        |       |       |
| Al2O3          | 13.66        | 13.37        | 13.79        | 13.34        | 14.23        | 13.52        | 13.68        | 13.48        | 13.51        | 13.46        | 13.46        | 13.55        | 13.88        | 13.97        | 13.57        | 13.64        | 13.58        | 13.55        |       |       |
| TiO2           | 1.967        | 1.953        | 2.073        | 2.034        | 1.999        | 2.045        | 2.021        | 1.989        | 1.995        | 1.986        | 2.045        | 2.059        | 2.063        | 2.013        | 2.025        | 2.017        | 1.950        | 1.997        |       |       |
| FeO            | 10.97        | 11.17        | 10.42        | 11.42        | 9.21         | 11.52        | 11.23        | 11.72        | 10.93        | 11.63        | 11.77        | 11.35        | 11.06        | 9.90         | 11.64        | 11.69        | 11.44        | 11.43        |       |       |
| MnO            | 0.187        | 0.188        | 0.190        | 0.187        | 0.165        | 0.192        | 0.196        | 0.183        | 0.181        | 0.185        | 0.186        | 0.185        | 0.192        | 0.195        | 0.191        | 0.192        | 0.186        | 0.188        |       |       |
| CaO            | 6.98         | 6.80         | 6.76         | 6.72         | 8.02         | 6.81         | 6.70         | 6.71         | 6.75         | 6.83         | 6.79         | 6.86         | 6.87         | 7.02         | 6.77         | 6.77         | 6.89         | 6.74         |       |       |
| MgO            | 3.38         | 3.29         | 3.21         | 3.18         | 3.44         | 3.27         | 3.19         | 3.19         | 3.17         | 3.30         | 3.24         | 3.28         | 3.30         | 3.37         | 3.24         | 3.24         | 3.32         | 3.22         |       |       |
| K2O            | 1.88         | 1.79         | 1.97         | 1.78         | 1.75         | 1.94         | 1.88         | 1.91         | 2.03         | 1.91         | 1.91         | 1.90         | 2.00         | 2.02         | 1.85         | 1.89         | 1.83         | 1.79         |       |       |
| Na2O           | 3.07         | 3.18         | 3.14         | 3.14         | 3.02         | 3.10         | 3.11         | 3.21         | 3.15         | 3.14         | 3.05         | 3.00         | 3.31         | 3.19         | 3.19         | 3.21         | 3.08         | 3.20         |       |       |
| P2O5           | <u>0.338</u> | <u>0.340</u> | <u>0.364</u> | <u>0.329</u> | <u>0.430</u> | <u>0.331</u> | <u>0.360</u> | <u>0.318</u> | <u>0.322</u> | <u>0.325</u> | <u>0.334</u> | <u>0.325</u> | <u>0.383</u> | <u>0.361</u> | <u>0.376</u> | <u>0.366</u> | <u>0.322</u> | <u>0.361</u> |       |       |
| analysis tota  | 97.83        | 96.62        | 98.28        | 97.01        | 97.00        | 98.53        | 98.09        | 98.73        | 98.10        | 98.36        | 98.51        | 98.44        | 99.99        | 98.77        | 98.74        | 98.84        | 98.27        | 97.97        |       |       |
| Normalized I   |              |              |              |              |              |              |              |              |              |              |              |              |              |              |              |              |              |              |       |       |
| SiO2           | 56.63        | 56.44        | 57.34        | 56.57        | 56.44        | 56.64        | 56.79        | 56.73        | 57.15        | 56.52        | 56.57        | 56.82        | 56.93        | 57.43        | 56.61        | 56.49        | 56.64        | 56.66        | 56.67 | 0.76  |
| Al2O3          | 13.96        | 13.84        | 14.03        | 13.75        | 14.67        | 13.72        | 13.95        | 13.66        | 13.77        | 13.69        | 13.66        | 13.76        | 13.88        | 14.15        | 13.75        | 13.80        | 13.82        | 13.83        | 14.05 | 0.35  |
| TiO2           | 2.010        | 2.021        | 2.110        | 2.097        | 2.061        | 2.075        | 2.060        | 2.015        | 2.034        | 2.019        | 2.076        | 2.091        | 2.063        | 2.038        | 2.051        | 2.040        | 1.984        | 2.038        | 2.047 | 0.037 |
| FeO*           | 11.22        | 11.57        | 10.60        | 11.77        | 9.49         | 11.69        | 11.45        | 11.87        | 11.15        | 11.82        | 11.94        | 11.53        | 11.06        | 10.02        | 11.79        | 11.83        | 11.64        | 11.66        | 10.97 | 0.95  |
| MnO            | 0.191        | 0.195        | 0.193        | 0.193        | 0.170        | 0.195        | 0.200        | 0.185        | 0.184        | 0.188        | 0.189        | 0.187        | 0.192        | 0.198        | 0.194        | 0.195        | 0.190        | 0.192        | 0.199 | 0.044 |
| CaO            | 7.13         | 7.04         | 6.88         | 6.93         | 8.27         | 6.91         | 6.84         | 6.80         | 6.88         | 6.95         | 6.89         | 6.97         | 6.87         | 7.11         | 6.85         | 6.85         | 7.01         | 6.88         | 7.23  | 0.40  |
| MgO            | 3.45         | 3.40         | 3.27         | 3.28         | 3.54         | 3.32         | 3.25         | 3.23         | 3.23         | 3.35         | 3.29         | 3.33         | 3.30         | 3.42         | 3.28         | 3.28         | 3.38         | 3.29         | 3.39  | 0.12  |
| K2O            | 1.92         | 1.85         | 2.01         | 1.84         | 1.81         | 1.97         | 1.92         | 1.94         | 2.06         | 1.94         | 1.94         | 1.93         | 2.00         | 2.04         | 1.88         | 1.91         | 1.86         | 1.82         | 1.95  | 0.39  |
| Na2O           | 3.14         | 3.29         | 3.20         | 3.24         | 3.11         | 3.14         | 3.17         | 3.25         | 3.21         | 3.20         | 3.10         | 3.05         | 3.31         | 3.23         | 3.23         | 3.24         | 3.14         | 3.27         | 3.12  | 0.37  |
| P2O5           | <u>0.345</u> | <u>0.352</u> | <u>0.370</u> | <u>0.339</u> | <u>0.444</u> | <u>0.336</u> | <u>0.367</u> | <u>0.322</u> | <u>0.328</u> | <u>0.330</u> | <u>0.339</u> | <u>0.330</u> | <u>0.383</u> | <u>0.366</u> | <u>0.381</u> | <u>0.370</u> | <u>0.328</u> | <u>0.368</u> | 0.359 | 0.028 |
| analysis total | 100.00       | 100.00       | 100.00       | 100.00       | 100.00       | 100.00       | 100.00       | 100.00       | 100.00       | 100.00       | 100.00       | 100.00       | 100.00       | 100.00       | 100.00       | 100.00       | 100.00       | 100.00       |       |       |
| Unnormalize    |              |              |              |              |              |              |              |              |              |              |              |              |              |              |              |              |              |              |       |       |
| Ni             | 6            | 5            | 5            | 4            | 4            | 3            | 2            | 2            | 1            | 1            | 0            | 0            | 10           | 10           | 8            | 9            | 9            | 8            | 9     | 5     |
| Cr             | 6            | 5            | 5            | 5            | 5            | 4            | 4            | 4            | 4            | 3            | 3            | 3            | 4            | 5            | 4            | 3            | 3            | 4            | 8     | 6     |
| Sc             | 31           | 31           | 31           | 31           | 31           | 31           | 31           | 30           | 30           | 30           | 30           | 30           | 32           | 32           | 30           | 32           | 31           | 31           | 32    | 3     |
| V              | 291          | 289          | 286          | 283          | 280          | 278          | 275          | 272          | 269          | 266          | 264          | 261          | 304          | 308          | 299          | 298          | 322          | 299          | 312   | 32    |
| Ba             | 820          | 826          | 832          | 838          | 844          | 850          | 855          | 861          | 867          | 873          | 879          | 885          | 753          | 811          | 720          | 726          | 706          | 715          | 771   | 72    |
| Rb             | 51           | 51           | 51           | 52           | 52           | 52           | 52           | 52           | 52           | 52           | 52           | 52           | 56           | 55           | 55           | 54           | 52           | 53           | 50    | 4     |
| Sr             | 345          | 346          | 347          | 348          | 349          | 350          | 351          | 352          | 353          | 354          | 355          | 356          | 337          | 346          | 334          | 330          | 317          | 332          | 336   | 14    |
| Zr             | 199          | 200          | 201          | 202          | 203          | 204          | 205          | 206          | 207          | 208          | 209          | 210          | 205          | 202          | 199          | 200          | 182          | 197          | 190   | 13    |
| Y              | 36           | 36           | 36           | 36           | 36           | 36           | 36           | 36           | 36           | 36           | 36           | 36           | 39           | 39           | 36           | 37           | 36           | 37           | 36    | 2     |
| Nb             | 12.6         | 12.6         | 12.6         | 12.7         | 12.7         | 12.7         | 12.8         | 12.8         | 12.8         | 12.8         | 12.9         | 12.9         | 14.9         | 14.6         | 14.2         | 14.9         | 13.3         | 13.7         | 12.8  | 0.9   |
| Ga             | 23           | 23           | 23           | 23           | 24           | 24           | 24           | 24           | 24           | 24           | 24           | 24           | 23           | 23           | 21           | 23           | 21           | 22           | 22    | 1     |
| Cu             | 11           | 10           | 9            | 9            | 8            | 7            | 7            | 6            | 5            | 5            | 4            | 4            | 14           | 15           | 13           | 14           | 17           | 15           | 16    | 9     |
| Zn             | 130          | 130          | 131          | 131          | 132          | 132          | 132          | 133          | 133          | 134          | 134          | 135          | 129          | 129          | 128          | 126          | 121          | 126          | 127   | 5     |
| Pb             | 10           | 10           | 10           | 10           | 10           | 10           | 10           | 10           | 10           | 10           | 10           | 10           | 9            | 10           | 11           | 9            | 9            | 10           | 9     | 1     |
| La             | 26           | 26           | 26           | 26           | 26           | 26           | 26           | 26           | 25           | 25           | 25           | 25           | 29           | 27           | 29           | 31           | 24           | 29           | 26    | 4     |
| Ce             | 60           | 61           | 61           | 62           | 62           | 63           | 63           | 64           | 64           | 65           | 65           | 66           | 55           | 61           | 58           | 62           | 52           | 58           | 56    | 7     |
| Th             | 8            | 8            | 9            | 9            | 9            | 10           | 10           | 10           | 11           | 11           | 11           | 12           | 6            | 7            | 6            | 6            | 6            | 6            | 6     | 2     |
| Nd             | 31           | 31           | 31           | 31           | 31           | 31           | 31           | 31           | 31           | 32           | 32           | 32           | 30           | 32           | 31           | 32           | 27           | 31           | 30    | 2     |
| U              |              |              |              |              |              |              |              | 0            |              |              |              |              | 2            | 4            | 2            | 2            | 2            | 3            | 2     | 1     |

ORTLEY  
53  
average std dev  
98.23 0.79

Table DR1 (c

|                |
|----------------|
| SN             |
| WSU run        |
| 7.5' Quad      |
| UTM N*         |
| UTM E*         |
| Unnormalize    |
| SiO2           |
| Al2O3          |
| TiO2           |
| FeO            |
| MnO            |
| CaO            |
| MgO            |
| K2O            |
| Na2O           |
| P2O5           |
| analysis tota  |
| Normalized I   |
| SiO2           |
| Al2O3          |
| TiO2           |
| FeO*           |
| MnO            |
| CaO            |
| MgO            |
| K2O            |
| Na2O           |
| P2O5           |
| analysis total |
| Unnormalize    |
| Ni             |
| Cr             |
| Sc             |
| V              |
| Ba             |
| Rb             |
| Sr             |
| Zr             |
| Y              |
| Nb             |
| Ga             |
| Cu             |
| Zn             |
| Pb             |
| La             |
| Ce             |
| Th             |
| Nd             |
| U              |

Table DR1 (continued). ANALYSES OF GRANDE RONDE BASALT LAVA FLOWS IN UPPER NACHES RIVER BASIN, YAKIMA AND KITTITAS COUNTIES, WASHINGTON

| MEEKS TABLE                             |              |              |              |              |              |              |              |              |              |              |                       |              |              |              |              |              |              |              |              |              |
|-----------------------------------------|--------------|--------------|--------------|--------------|--------------|--------------|--------------|--------------|--------------|--------------|-----------------------|--------------|--------------|--------------|--------------|--------------|--------------|--------------|--------------|--------------|
| SN                                      | 77024        | 77025        | 94114        | 94349        | 94372        | 95057        | 95183        | 96188        | 96189        | 96267        | 96269                 | 96270        | 99002        | 99060        | 00179        | 01210        | 01212        | 02012        | 02016        | 02018        |
| WSU run                                 | 0202         | 0202         | 0202         | 1194(2)      | 1194(2)      | 0596         | 0596         | 0897         | 0202         | 0197         | 0197                  | 0197         | 0799         | 0799         | 0203         | 0202         | 0202         | 0106         | 0402         | 0402         |
| 7.5' Quad                               | Mt. Clifty   | Mt. Clifty   | Weeks Table  | Old Scab Mtn | Old Scab Mtn | imberwolf Mt | Weeks Table  | Cliffdell    | Cliffdell    | Cliffdell    | Cliffdell             | Cliffdell    | Cliffdell    | Quartz Mtn   | Mt. Clifty   | Cliffdell    | Cliffdell    | Cliffdell    | Cliffdell    | Cliffdell    |
| UTM N*                                  | 5210230      | 5211080      | 5186740      | 5195850      | 5198200      | 5186170      | 5188020      | 5204870      | 5203560      | 5204910      | 5205150               | 5205240      | 5205040      | 5207830      | 5208420      | 5204370      | 5203410      | 5204580      | 5204830      | 5204350      |
| UTM E*                                  | 640170       | 638470       | 643460       | 639800       | 641600       | 638280       | 644070       | 643950       | 644400       | 642850       | 645340                | 643640       | 645850       | 650900       | 641980       | 645020       | 645035       | 643910       | 644130       | 644440       |
| Unnormalized Major Elements (Weight %): |              |              |              |              |              |              |              |              |              |              |                       |              |              |              |              |              |              |              |              |              |
| SiO2                                    | 54.42        | 54.76        | 55.06        | 55.97        | 55.54        | 55.35        | 54.63        | 53.65        | 55.02        | 51.93        | 52.78                 | 53.23        | 55.22        | 55.03        | 54.90        | 54.41        | 54.09        | 53.81        | 54.95        | 54.68        |
| Al2O3                                   | 13.73        | 13.90        | 13.77        | 13.93        | 13.94        | 14.00        | 13.80        | 13.51        | 13.94        | 13.03        | 13.31                 | 13.40        | 13.99        | 13.96        | 13.82        | 13.88        | 13.71        | 13.53        | 13.77        | 13.80        |
| TiO2                                    | 1.974        | 1.985        | 2.002        | 1.979        | 1.978        | 1.926        | 1.923        | 1.894        | 2.010        | 1.891        | 1.848                 | 1.908        | 1.973        | 1.919        | 1.974        | 1.975        | 1.973        | 1.964        | 1.973        | 1.964        |
| FeO                                     | 11.25        | 10.63        | 11.18        | 11.09        | 11.01        | 11.18        | 11.49        | 11.36        | 10.07        | 11.39        | 11.37                 | 11.27        | 11.24        | 11.42        | 11.37        | 11.29        | 11.70        | 11.43        | 11.59        | 11.86        |
| MnO                                     | 0.204        | 0.215        | 0.174        | 0.169        | 0.193        | 0.190        | 0.191        | 0.195        | 0.204        | 0.185        | 0.181                 | 0.190        | 0.195        | 0.189        | 0.195        | 0.210        | 0.195        | 0.195        | 0.180        | 0.193        |
| CaO                                     | 7.74         | 8.03         | 7.46         | 7.40         | 7.56         | 8.56         | 7.60         | 7.47         | 7.91         | 7.41         | 7.35                  | 7.59         | 7.80         | 7.69         | 7.70         | 7.80         | 7.69         | 7.43         | 7.43         | 7.73         |
| MgO                                     | 4.06         | 3.81         | 3.81         | 3.88         | 4.00         | 3.92         | 4.17         | 4.14         | 3.95         | 3.61         | 3.75                  | 3.89         | 3.64         | 4.27         | 3.94         | 4.09         | 4.21         | 3.78         | 3.88         | 3.74         |
| K2O                                     | 1.35         | 1.35         | 1.56         | 1.53         | 1.53         | 1.46         | 1.56         | 1.53         | 1.67         | 1.48         | 1.47                  | 1.49         | 1.47         | 1.58         | 1.47         | 1.49         | 1.40         | 1.61         | 1.54         | 1.55         |
| Na2O                                    | 3.17         | 3.33         | 3.31         | 3.38         | 3.30         | 3.88         | 3.40         | 3.03         | 3.21         | 2.99         | 3.08                  | 3.03         | 3.17         | 3.38         | 3.16         | 3.05         | 3.13         | 3.06         | 3.17         | 3.14         |
| P2O5                                    | <u>0.328</u> | <u>0.337</u> | <u>0.340</u> | <u>0.332</u> | <u>0.333</u> | <u>0.326</u> | <u>0.335</u> | <u>0.316</u> | <u>0.335</u> | <u>0.306</u> | <u>0.297</u>          | <u>0.310</u> | <u>0.346</u> | <u>0.319</u> | <u>0.324</u> | <u>0.327</u> | <u>0.322</u> | <u>0.328</u> | <u>0.328</u> | <u>0.329</u> |
| analysis tota                           | 98.23        | 98.35        | 98.66        | 99.66        | 99.38        | 100.79       | 99.10        | 97.09        | 98.32        | 94.23        | 95.44                 | 96.31        | 99.05        | 99.76        | 98.85        | 98.52        | 98.42        | 97.14        | 98.81        | 98.98        |
| Normalized Major Elements (Weight %):   |              |              |              |              |              |              |              |              |              |              |                       |              |              |              |              |              |              |              |              |              |
| SiO2                                    | 55.40        | 55.68        | 55.81        | 56.16        | 55.88        | 54.92        | 55.13        | 55.26        | 55.96        | 55.11        | 55.30                 | 55.27        | 55.75        | 55.16        | 55.54        | 55.23        | 54.96        | 55.40        | 55.61        | 55.24        |
| Al2O3                                   | 13.98        | 14.13        | 13.96        | 13.98        | 14.03        | 13.89        | 13.93        | 13.91        | 14.18        | 13.83        | 13.95                 | 13.91        | 14.12        | 13.99        | 13.98        | 14.09        | 13.93        | 13.93        | 13.94        | 13.94        |
| TiO2                                    | 2.010        | 2.018        | 2.029        | 1.986        | 1.990        | 1.911        | 1.940        | 1.951        | 2.044        | 2.007        | 1.936                 | 1.981        | 1.992        | 1.924        | 1.997        | <b>2.005</b> | <b>2.005</b> | 2.022        | 1.997        | 1.984        |
| FeO*                                    | 11.45        | 10.81        | 11.33        | 11.13        | 11.08        | 11.09        | 11.59        | 11.70        | 10.24        | 12.09        | 11.92                 | 11.70        | 11.35        | 11.45        | 11.50        | 11.46        | 11.89        | 11.77        | 11.73        | 11.98        |
| MnO                                     | 0.208        | 0.219        | 0.176        | 0.170        | 0.194        | 0.189        | 0.193        | 0.201        | 0.207        | 0.196        | 0.190                 | 0.197        | 0.20         | 0.189        | 0.197        | 0.213        | 0.198        | 0.201        | 0.182        | 0.195        |
| CaO                                     | 7.88         | 8.17         | 7.56         | 7.43         | 7.61         | 8.49         | 7.67         | 7.69         | 8.05         | 7.86         | 7.70                  | 7.88         | 7.88         | 7.71         | 7.79         | 7.92         | 7.81         | 7.65         | 7.52         | 7.81         |
| MgO                                     | 4.13         | 3.87         | 3.86         | 3.89         | 4.02         | 3.89         | 4.21         | 4.26         | 4.02         | 3.83         | 3.93                  | 4.04         | 3.68         | 4.28         | 3.99         | 4.15         | 4.28         | 3.89         | 3.93         | 3.78         |
| K2O                                     | 1.37         | 1.37         | 1.58         | 1.54         | 1.54         | 1.45         | 1.57         | 1.58         | 1.70         | 1.57         | 1.54                  | 1.55         | 1.48         | 1.58         | 1.49         | 1.51         | 1.42         | 1.66         | 1.56         | 1.57         |
| Na2O                                    | 3.23         | 3.39         | 3.35         | 3.39         | 3.32         | 3.85         | 3.43         | 3.12         | 3.26         | 3.17         | 3.23                  | 3.15         | 3.20         | 3.39         | 3.20         | 3.10         | 3.18         | 3.15         | 3.21         | 3.17         |
| P2O5                                    | <u>0.334</u> | <u>0.343</u> | <u>0.345</u> | <u>0.333</u> | <u>0.335</u> | <u>0.323</u> | <u>0.338</u> | <u>0.325</u> | <u>0.341</u> | <u>0.325</u> | <u>0.311</u>          | <u>0.322</u> | <u>0.35</u>  | <u>0.320</u> | <u>0.328</u> | <u>0.332</u> | <u>0.327</u> | <u>0.337</u> | <u>0.332</u> | <u>0.332</u> |
|                                         | 100.00       | 100.00       | 100.00       | 100.00       | 100.00       | 100.00       | 100.00       | 100.00       | 100.00       | 100.00       | 100.00                | 100.00       | 100.00       | 100.00       | 100.00       | 100.00       | 100.00       | 100.00       | 100.00       | 100.00       |
| Unnormalized Trace Elements (ppm):      |              |              |              |              |              |              |              |              |              |              | Trace Elements (ppm): |              |              |              |              |              |              |              |              |              |
| Ni                                      | 12           | 11           | 9            | 7            | 7            | 9            | 7            | 4            | 12           | 7            | 5                     | 5            | 10           | 12           | 16           | 14           | 15           | 30           | 15           | 11           |
| Cr                                      | 27           | 25           | 29           | 19           | 17           | 20           | 15           | 21           | 24           | 19           | 24                    | 23           | 29           | 28           | 19           | 30           | 26           | 14           | 26           | 27           |
| Sc                                      | 40           | 42           | 33           | 36           | 35           | 31           | 45           | 27           | 37           | 32           | 25                    | 26           | 44           | 41           | 37           | 40           | 37           | 33           | 35           | 34           |
| V                                       | 346          | 351          | 347          | 361          | 346          | 342          | 349          | 345          | 343          | 329          | 326                   | 336          | 346          | 352          | 340          | 341          | 340          | 349          | 346          | 346          |
| Ba                                      | 618          | 691          | 649          | 598          | 598          | 629          | 674          | 657          | 667          | 639          | 628                   | 629          | 632          | 619          | 607          | 604          | 634          | 626          | 613          | 623          |
| Rb                                      | 39           | 41           | 40           | 41           | 37           | 41           | 41           | 43           | 43           | 44           | 40                    | 41           | 42           | 40           | 39           | 40           | 32           | 41           | 40           | 40           |
| Sr                                      | 309          | 320          | 312          | 306          | 303          | 314          | 311          | 311          | 321          | 315          | 314                   | 315          | 321          | 314          | 308          | 315          | 312          | 305          | 311          | 321          |
| Zr                                      | 163          | 168          | 166          | 165          | 162          | 163          | 161          | 163          | 168          | 163          | 159                   | 163          | 165          | 161          | 165          | 164          | 164          | 166          | 168          | 167          |
| Y                                       | 34           | 35           | 35           | 34           | 34           | 33           | 35           | 34           | 34           | 33           | 34                    | 34           | 37           | 33           | 35           | 35           | 33           | 33           | 36           | 35           |
| Nb                                      | 11.4         | 11.1         | 12.5         | 12.9         | 15.2         | 13.5         | 12.5         | 12.2         | 12.1         | 11.6         | 11.5                  | 11.6         | 12.5         | 12.4         | 11.9         | 12.6         | 13.0         | 11.1         | 12.4         | 13.0         |
| Ga                                      | 19           | 22           | 20           | 22           | 22           | 18           | 22           | 24           | 25           | 23           | 21                    | 22           | 20           | 22           | 19           | 21           | 21           | 23           | 20           | 18           |
| Cu                                      | 36           | 31           | 32           | 33           | 25           | 24           | 17           | 23           | 31           | 22           | 18                    | 19           | 37           | 36           | 35           | 33           | 35           | 31           | 33           | 34           |
| Zn                                      | 116          | 119          | 116          | †124         | 115          | 115          | 117          | 111          | 116          | 120          | 116                   | 114          | 116          | 112          | 118          | 116          | 117          | 120          | 118          | 120          |
| Pb                                      | 9            | 7            | 7            | 7            | 6            | 8            | 8            | 9            | 6            | 5            | 4                     | 8            | 6            | 10           | 16           | 6            | 5            | 8            | 6            | 9            |
| La                                      | 28           | 15           | 25           | 36           | 6            | 28           | 18           | 23           | 18           | 27           | 16                    | 25           | 25           | 23           | 25           | 24           | 17           | 21           | 28           | 15           |
| Ce                                      | 51           | 48           | 43           | 51           | 48           | 0            | 0            | 42           | 59           | 34           | 42                    | 36           | 62           | 32           | 36           | 44           | 42           | 41           | 46           | 56           |
| Th                                      | 5            | 2            | 7            | 3            | 5            | 5            | 1            | 4            | 6            | 7            | 6                     | 4            | 5            | 5            | 6            | 4            | 7            | 3            | 5            | 7            |
| Nd                                      | nd           | nd           | nd           | nd           | nd           | nd           | nd           | nd           | nd           | nd           | nd                    | nd           | nd           | nd           | nd           | nd           | nd           | 26           | nd           | nd           |
| U                                       | nd                    | nd           | nd           | nd           | nd           | nd           | nd           | nd           | nd           | nd           |

\*to nearest 5 m  
"†" denotes values >120% of highest standard.  
nd, not determined

Table DR1 (c

| M             |              |              |              |              |              |              |              |              |              |              |              |              |              |              |              |              |               |                |               |               |
|---------------|--------------|--------------|--------------|--------------|--------------|--------------|--------------|--------------|--------------|--------------|--------------|--------------|--------------|--------------|--------------|--------------|---------------|----------------|---------------|---------------|
| SN            | 02020        | 02073        | 02124        | 02137        | 02142        | 02201        | 03007        | 03076        | 03077        | 04019        | 04024        | 4033         | 04055        | '04056       | '04066       | 04077        | 04087         | 04097          | 04102         | 04107         |
| WSU run       | 0402         | 0402         | 0402         | 0402         | 0402         | 0402         | 0204         | 0204         | 0204         | 0404(1)      | 0404(1)      | 0404(1)      | 0404(1)      | 0404(1)      | 0404(1)      | 0404(1)      | 0404(1)       | 0404(2)        | 0405(2)       | 0404(2)       |
| 7.5' Quad     | Cliffdell    | Old Scab Mtn | Mt. Clifty   | Tieton Basin | Tieton Basin | Cliffdell    | Cliffdell    | Cliffdell    | Cliffdell    | Meeks Table  | Meeks Table  | Meeks Table  | Nile         | Nile         | Nile         | Nile         | Veddle Canyon | clanastash Lsk | lanastash Lsk | lanastash Lsk |
| UTM N*        | 5204980      | 5197720      | 5210480      | 5175040      | 5174630      | 5203820      | 5206620      | 5204240      | 5204240      | 5181580      | 5181420      | 5179200      | 5185820      | 5186510      | 5191140      | 5192680      | 5177600       | 5197590        | 5203090       | 5205430       |
| UTM E*        | 644030       | 641300       | 639560       | 645530       | 644260       | 644850       | 644900       | 642720       | 642720       | 648700       | 647040       | 650920       | 657790       | 657460       | 656130       | 654900       | 653100        | 654440         | 657850        | 655040        |
| Unnormalize   |              |              |              |              |              |              |              |              |              |              |              |              |              |              |              |              |               |                |               |               |
| SiO2          | 54.60        | 55.36        | 54.70        | 54.95        | 52.39        | 54.54        | 54.92        | 54.77        | 54.59        | 54.57        | 55.05        | 54.83        | 54.80        | 55.20        | 55.15        | 54.78        | 55.48         | 53.56          | 54.18         | 53.36         |
| Al2O3         | 13.65        | 13.82        | 13.77        | 13.79        | 13.40        | 13.72        | 13.94        | 13.91        | 13.86        | 13.91        | 13.98        | 13.82        | 13.87        | 14.02        | 13.89        | 14.05        | 14.94         | 14.33          | 14.30         | 13.93         |
| TiO2          | 1.938        | 2.024        | 1.944        | 1.981        | 1.909        | 1.999        | 1.887        | 1.963        | 1.900        | 1.979        | 1.976        | 1.951        | 1.966        | 1.892        | 1.942        | 1.903        | 2.048         | 1.859          | 1.975         | 1.942         |
| FeO           | 11.83        | 11.33        | 11.72        | 11.62        | 12.54        | 12.03        | 11.54        | 11.55        | 11.88        | 11.65        | 11.78        | 12.01        | 11.86        | 11.55        | 11.53        | 11.66        | 9.37          | 10.65          | 10.48         | 12.03         |
| MnO           | 0.205        | 0.194        | 0.205        | 0.182        | 0.196        | 0.207        | 0.193        | 0.201        | 0.192        | 0.199        | 0.196        | 0.201        | 0.199        | 0.192        | 0.203        | 0.194        | 0.196         | 0.205          | 0.196         | 0.213         |
| CaO           | 7.66         | 7.66         | 7.71         | 7.39         | 8.11         | 7.63         | 7.83         | 7.79         | 7.75         | 7.79         | 7.75         | 7.75         | 7.75         | 7.87         | 7.85         | 7.97         | 9.15          | 9.86           | 8.81          | 8.82          |
| MgO           | 3.91         | 3.85         | 3.97         | 3.77         | 3.72         | 3.89         | 4.16         | 4.05         | 4.14         | 3.80         | 3.94         | 4.14         | 3.96         | 4.10         | 4.04         | 4.21         | 3.83          | 4.04           | 4.17          | 4.22          |
| K2O           | 1.54         | 1.61         | 1.36         | 1.56         | 1.56         | 1.53         | 1.58         | 1.61         | 1.80         | 1.38         | 1.57         | 1.62         | 1.58         | 1.67         | 1.63         | 1.61         | 1.34          | 1.29           | 1.18          | 1.19          |
| Na2O          | 3.06         | 3.05         | 3.22         | 3.19         | 3.03         | 3.14         | 3.12         | 3.07         | 2.98         | 3.26         | 3.18         | 3.13         | 3.06         | 3.05         | 3.02         | 3.04         | 2.99          | 2.85           | 3.04          | 2.77          |
| P2O5          | <u>0.321</u> | <u>0.337</u> | <u>0.325</u> | <u>0.333</u> | <u>0.307</u> | <u>0.337</u> | <u>0.314</u> | <u>0.324</u> | <u>0.307</u> | <u>0.333</u> | <u>0.333</u> | <u>0.325</u> | <u>0.327</u> | <u>0.313</u> | <u>0.315</u> | <u>0.300</u> | <u>0.320</u>  | <u>0.333</u>   | <u>0.298</u>  | <u>0.292</u>  |
| analysis tota | 98.72        | 99.24        | 98.93        | 98.76        | 97.16        | 99.03        | 99.48        | 99.23        | 99.41        | 98.87        | 99.76        | 99.78        | 99.38        | 99.86        | 99.58        | 99.71        | 99.66         | 98.97          | 98.62         | 98.76         |
| Normalized I  |              |              |              |              |              |              |              |              |              |              |              |              |              |              |              |              |               |                |               |               |
| SiO2          | 55.31        | 55.79        | 55.29        | 55.64        | 53.92        | 55.08        | 55.21        | 55.19        | 54.91        | 55.19        | 55.18        | 54.95        | 55.15        | 55.28        | 55.38        | 54.94        | 55.67         | 54.12          | 54.94         | 54.03         |
| Al2O3         | 13.83        | 13.93        | 13.92        | 13.96        | 13.79        | 13.85        | 14.01        | 14.01        | 13.95        | 14.07        | 14.01        | 13.86        | 13.96        | 14.04        | 13.95        | 14.09        | 14.99         | 14.47          | 14.50         | 14.11         |
| TiO2          | 1.963        | <b>2.040</b> | 1.965        | 2.006        | 1.965        | 2.019        | 1.897        | 1.978        | 1.911        | 2.002        | 1.981        | 1.955        | 1.978        | 1.895        | 1.950        | 1.909        | 2.055         | 1.878          | 2.003         | 1.966         |
| FeO*          | 11.99        | 11.42        | 11.85        | 11.76        | 12.90        | 12.15        | 11.60        | 11.64        | 11.95        | 11.78        | 11.81        | 12.03        | 11.93        | 11.57        | 11.58        | 11.69        | 9.41          | 10.76          | 10.63         | 12.18         |
| MnO           | 0.208        | 0.195        | 0.207        | 0.184        | 0.202        | 0.209        | 0.194        | 0.202        | 0.193        | 0.201        | 0.197        | 0.201        | 0.200        | 0.193        | 0.204        | 0.195        | 0.197         | 0.207          | 0.199         | 0.216         |
| CaO           | 7.76         | 7.72         | 7.79         | 7.48         | 8.35         | 7.70         | 7.87         | 7.85         | 7.80         | 7.87         | 7.77         | 7.77         | 7.80         | 7.89         | 7.88         | 7.99         | 9.18          | 9.96           | 8.93          | 8.93          |
| MgO           | 3.96         | 3.88         | 4.01         | 3.82         | 3.83         | 3.93         | 4.18         | 4.08         | 4.17         | 3.85         | 3.95         | 4.15         | 3.99         | 4.11         | 4.06         | 4.22         | 3.84          | 4.08           | 4.22          | 4.27          |
| K2O           | 1.56         | 1.62         | 1.37         | 1.58         | 1.61         | 1.55         | 1.59         | 1.62         | 1.81         | 1.40         | 1.58         | 1.62         | 1.59         | 1.67         | 1.64         | 1.61         | 1.34          | 1.30           | 1.19          | 1.20          |
| Na2O          | 3.10         | 3.07         | 3.25         | 3.23         | 3.12         | 3.17         | 3.14         | 3.09         | 3.00         | 3.29         | 3.18         | 3.14         | 3.08         | 3.06         | 3.03         | 3.05         | 3.00          | 2.88           | 3.08          | 2.81          |
| P2O5          | <u>0.325</u> | <u>0.340</u> | <u>0.329</u> | <u>0.337</u> | <u>0.316</u> | <u>0.340</u> | <u>0.315</u> | <u>0.326</u> | <u>0.309</u> | <u>0.337</u> | <u>0.334</u> | <u>0.326</u> | <u>0.329</u> | <u>0.313</u> | <u>0.316</u> | <u>0.301</u> | <u>0.321</u>  | <u>0.337</u>   | <u>0.302</u>  | <u>0.296</u>  |
|               | 100.00       | 100.00       | 100.00       | 100.00       | 100.00       | 100.00       | 100.00       | 100.00       | 100.00       | 100.00       | 100.00       | 100.00       | 100.00       | 100.00       | 100.00       | 100.00       | 100.00        | 100.00         | 100.00        | 100.00        |
| Unnormalize   |              |              |              |              |              |              |              |              |              |              |              |              |              |              |              |              |               |                |               |               |
| Ni            | 13           | 10           | 16           | 14           | 13           | 15           | 14           | 13           | 12           | 14           | 13           | 15           | 17           | 17           | 16           | 21           | 10            | 16             | 18            | 14            |
| Cr            | 23           | 26           | 23           | 26           | 24           | 26           | 10           | 7            | 10           | 11           | 10           | 13           | 11           | 12           | 12           | 14           | 23            | 43             | 23            | 23            |
| Sc            | 30           | 37           | 37           | 35           | 34           | 31           | 33           | 33           | 32           | 34           | 34           | 33           | 32           | 33           | 33           | 35           | 39            | 38             | 38            | 38            |
| V             | 337          | 358          | 333          | 344          | 346          | 344          | 343          | 359          | 347          | 355          | 360          | 353          | 351          | 339          | 345          | 356          | 364           | 314            | 348           | 343           |
| Ba            | 618          | 638          | 615          | 625          | 705          | 617          | 619          | 624          | 604          | 663          | 670          | 630          | 625          | <b>628</b>   | <b>616</b>   | <b>611</b>   | 705           | 546            | 572           | 665           |
| Rb            | 45           | 43           | 40           | 41           | 43           | 42           | 43           | 44           | 43           | 43           | 42           | 43           | 42           | 42           | 44           | 42           | 32            | 31             | 31            | 30            |
| Sr            | 316          | 309          | 315          | 306          | 340          | 313          | 321          | 322          | 318          | 330          | 318          | 313          | 320          | 321          | 316          | 323          | 365           | 323            | 332           | 331           |
| Zr            | 166          | 168          | 165          | 168          | 163          | 168          | 166          | 173          | 167          | 172          | 167          | 164          | 169          | 163          | 168          | 157          | 164           | 158            | 161           | 155           |
| Y             | 35           | 36           | 34           | 35           | 35           | 35           | 34           | 34           | 34           | 34           | 33           | 34           | 33           | 32           | 33           | 31           | 34            | 34             | 35            | 33            |
| Nb            | 12.2         | 11.8         | 13.4         | 13.1         | 12.8         | 11.5         | 10.5         | 11.6         | 11.3         | 13.2         | 11.9         | 12.6         | 12.9         | 12.3         | 12.0         | 11.3         | 13.1          | 12.1           | 11.6          | 11.5          |
| Ga            | 21           | 23           | 21           | 22           | 18           | 20           | 22           | 21           | 19           | 22           | 24           | 22           | 22           | 21           | 22           | 22           | 23            | 21             | 22            | 20            |
| Cu            | 31           | 31           | 35           | 34           | 32           | 36           | 25           | 29           | 26           | 25           | 22           | 19           | 24           | 17           | 25           | 21           | 24            | 27             | 29            | 17            |
| Zn            | 116          | 119          | 115          | 116          | 119          | 116          | 115          | 124          | 119          | 117          | 119          | 118          | 119          | 116          | 117          | 116          | 125           | 117            | 123           | 117           |
| Pb            | 8            | 8            | 6            | 6            | 9            | 6            | 8            | 7            | 7            | 6            | 8            | 8            | 7            | 7            | 7            | 7            | 6             | 5              | 8             | 6             |
| La            | 20           | 25           | 26           | 25           | 20           | 26           | 23           | 20           | 23           | 21           | 18           | 20           | 22           | 26           | 22           | 17           | 19            | 17             | 21            | 13            |
| Ce            | 46           | 68           | 52           | 49           | 39           | 55           | 46           | 49           | 47           | 58           | 49           | 49           | 50           | 46           | 40           | 44           | 41            | 39             | 42            | 44            |
| Th            | 6            | 7            | 7            | 6            | 4            | 7            | 5            | 6            | 4            | 4            | 4            | 4            | 5            | 5            | 4            | 4            | 4             | 4              | 4             | 2             |
| Nd            | nd           | nd           | nd           | nd           | nd           | nd           | nd           | nd           | nd           | 30           | 27           | 26           | 23           | 24           | 22           | 24           | 27            | 21             | 23            | 25            |
| U             | nd            | nd             | nd            | nd            |

Table DR1 (c

| M             |              |               |               |              |               |               |              |              |                |              |              |              |              |              |              |              |              |               |              |               |
|---------------|--------------|---------------|---------------|--------------|---------------|---------------|--------------|--------------|----------------|--------------|--------------|--------------|--------------|--------------|--------------|--------------|--------------|---------------|--------------|---------------|
| SN            | '04118       | 04130         | 04132         | 04175        | 04204         | 04208         | 04209        | '04210       | 04216          | 04220        | 04225        | 04228        | 04234        | 04240        | 04241        | 04242        | 05039        | '05081        | 05103        | 05116         |
| WSU run       | 0404(2)      | 0404(2)       | 0404(2)       | 0504(2)      | 0504(2)       | 0504(2)       | 0504(1)      | 0504(1)      | 0504(1)        | 0504(1)      | 0504(2)      | 0504(2)      | 0504(1)      | 0504(1)      | 0504(2)      | 0504(2)      | 0305(1)      | 0305(2)       | 0405(3)      | 0405(2)       |
| 7.5' Quad     | Nile         | Ianastash Lsk | Ianastash Lsk | Nile         | Ianastash Lsk | Ianastash Lsk | Nile         | Nile         | Ianastash Lake | Ianastash La | Ianastash La | Ianastash La | Ianastash La | Weeks Table  | Nile         | Ianastash La | Ianastash La | Weddle Canyoc | Nile         | Weddle Canyoc |
| UTM N*        | 5192650      | 5201420       | 5203140       | 5192710      | 5193060       | 5197380       | 5188060      | 5188440      | 5195240        | 5194420      | 5195880      | 5197210      | 5187000      | 5190830      | 5194700      | 5194160      | 5175010      | 5182870       | 5173360      | 5173290       |
| UTM E*        | 655460       | 659130        | 655580        | 654600       | 653940        | 653740        | 658780       | 658680       | 655860         | 657060       | 654800       | 656810       | 643440       | 656130       | 654010       | 654280       | 655200       | 660660        | 659680       | 659610        |
| Unnormalize   |              |               |               |              |               |               |              |              |                |              |              |              |              |              |              |              |              |               |              |               |
| SiO2          | 54.80        | 54.87         | 55.38         | 54.53        | 54.55         | 55.79         | 55.32        | 54.84        | 54.75          | 55.15        | 54.96        | 54.90        | 54.78        | 54.70        | 54.75        | 54.84        | 53.31        | 54.34         | 54.72        | 53.95         |
| Al2O3         | 13.86        | 13.90         | 14.12         | 13.78        | 13.80         | 15.16         | 13.88        | 13.84        | 13.81          | 14.03        | 13.92        | 14.00        | 13.72        | 13.61        | 13.81        | 1.882        | 13.85        | 13.65         | 13.82        | 13.57         |
| TiO2          | 2.000        | 1.899         | 1.936         | 1.909        | 1.887         | 1.961         | 1.902        | 1.892        | 1.920          | 1.954        | 1.912        | 1.941        | 1.973        | 1.944        | 1.911        | 13.81        | 1.919        | 1.935         | 1.894        | 1.931         |
| FeO           | 11.74        | 11.53         | 10.86         | 11.54        | 11.44         | 8.03          | 10.65        | 11.32        | 11.62          | 10.87        | 11.28        | 11.15        | 11.76        | 11.41        | 11.42        | 11.38        | 11.38        | 11.19         | 11.04        | 11.23         |
| MnO           | 0.236        | 0.178         | 0.156         | 0.194        | 0.186         | 0.155         | 0.193        | 0.169        | 0.188          | 0.176        | 0.188        | 0.168        | 0.181        | 0.189        | 0.192        | 0.191        | 0.197        | 0.193         | 0.187        | 0.192         |
| CaO           | 7.75         | 7.68          | 7.50          | 7.63         | 7.63          | 8.87          | 7.74         | 7.38         | 7.67           | 7.81         | 7.66         | 7.36         | 7.35         | 7.61         | 7.61         | 3.97         | 8.65         | 7.66          | 7.62         | 7.49          |
| MgO           | 3.90         | 4.15          | 4.11          | 4.02         | 4.00          | 3.93          | 4.04         | 3.97         | 4.04           | 3.99         | 3.94         | 4.06         | 3.92         | 3.88         | 4.07         | 7.70         | 3.82         | 3.85          | 4.05         | 3.84          |
| K2O           | 1.71         | 1.52          | 1.57          | 1.66         | 1.61          | 1.48          | 1.62         | 1.52         | 1.64           | 1.46         | 1.65         | 1.52         | 1.53         | 1.68         | 1.70         | 3.04         | 1.15         | 1.58          | 1.61         | 1.61          |
| Na2O          | 3.17         | 3.22          | 3.28          | 3.03         | 3.09          | 2.92          | 3.04         | 3.21         | 3.08           | 3.14         | 3.11         | 3.24         | 3.23         | 2.99         | 3.06         | 1.65         | 2.77         | 3.05          | 3.14         | 3.07          |
| P2O5          | <u>0.350</u> | <u>0.306</u>  | <u>0.315</u>  | <u>0.320</u> | <u>0.313</u>  | <u>0.359</u>  | <u>0.312</u> | <u>0.312</u> | <u>0.315</u>   | <u>0.336</u> | <u>0.318</u> | <u>0.316</u> | <u>0.333</u> | <u>0.317</u> | <u>0.325</u> | <u>0.321</u> | <u>0.283</u> | <u>0.322</u>  | <u>0.310</u> | <u>0.322</u>  |
| analysis tota | 99.51        | 99.25         | 99.24         | 98.59        | 98.50         | 98.67         | 98.69        | 98.46        | 99.03          | 98.91        | 98.94        | 98.67        | 98.78        | 98.32        | 98.85        | 98.79        | 97.33        | 97.78         | 98.38        | 97.20         |
| Normalized I  |              |               |               |              |               |               |              |              |                |              |              |              |              |              |              |              |              |               |              |               |
| SiO2          | 55.07        | 55.28         | 55.81         | 55.31        | 55.38         | 56.55         | 56.05        | 55.70        | 55.29          | 55.76        | 55.55        | 55.64        | 55.45        | 55.63        | 55.39        | 55.52        | 54.77        | 55.58         | 55.62        | 55.50         |
| Al2O3         | 13.93        | 14.01         | 14.23         | 13.97        | 14.01         | 15.36         | 14.06        | 14.06        | 13.94          | 14.18        | 14.06        | 14.19        | 13.89        | 13.84        | 13.97        | 13.98        | 14.23        | 13.96         | 14.05        | 13.96         |
| TiO2          | 2.010        | 1.913         | 1.951         | 1.937        | 1.915         | 1.987         | 1.927        | 1.922        | 1.938          | 1.975        | 1.933        | 1.967        | 1.998        | 1.977        | 1.933        | 1.905        | 1.972        | 1.979         | 1.925        | 1.986         |
| FeO*          | 11.80        | 11.62         | 10.95         | 11.70        | 11.61         | 8.14          | 10.79        | 11.50        | 11.74          | 10.99        | 11.40        | 11.30        | 11.91        | 11.60        | 11.55        | 11.52        | 11.69        | 11.44         | 11.22        | 11.55         |
| MnO           | 0.237        | 0.179         | 0.157         | 0.197        | 0.189         | 0.157         | 0.195        | 0.172        | 0.190          | 0.178        | 0.190        | 0.171        | 0.183        | 0.192        | 0.194        | 0.193        | 0.203        | 0.197         | 0.190        | 0.198         |
| CaO           | 7.79         | 7.74          | 7.56          | 7.73         | 7.75          | 8.99          | 7.84         | 7.49         | 7.74           | 7.89         | 7.74         | 7.46         | 7.44         | 7.74         | 7.70         | 7.79         | 8.88         | 7.84          | 7.74         | 7.70          |
| MgO           | 3.91         | 4.18          | 4.14          | 4.08         | 4.06          | 3.98          | 4.09         | 4.04         | 4.08           | 4.04         | 3.98         | 4.12         | 3.97         | 3.94         | 4.11         | 4.02         | 3.93         | 3.94          | 4.12         | 3.95          |
| K2O           | 1.71         | 1.53          | 1.58          | 1.68         | 1.63          | 1.50          | 1.64         | 1.55         | 1.66           | 1.48         | 1.67         | 1.54         | 1.55         | 1.71         | 1.72         | 1.67         | 1.18         | 1.61          | 1.64         | 1.65          |
| Na2O          | 3.18         | 3.24          | 3.31          | 3.07         | 3.13          | 2.96          | 3.08         | 3.26         | 3.11           | 3.17         | 3.14         | 3.29         | 3.27         | 3.04         | 3.09         | 3.08         | 2.85         | 3.12          | 3.19         | 3.16          |
| P2O5          | <u>0.352</u> | <u>0.309</u>  | <u>0.317</u>  | <u>0.325</u> | <u>0.317</u>  | <u>0.364</u>  | <u>0.316</u> | <u>0.317</u> | <u>0.318</u>   | <u>0.339</u> | <u>0.322</u> | <u>0.321</u> | <u>0.337</u> | <u>0.322</u> | <u>0.328</u> | <u>0.325</u> | <u>0.291</u> | <u>0.329</u>  | <u>0.315</u> | <u>0.332</u>  |
|               | 100.00       | 100.00        | 100.00        | 100.00       | 100.00        | 100.00        | 100.00       | 100.00       | 100.00         | 100.00       | 100.00       | 100.00       | 100.00       | 100.00       | 100.00       | 100.00       | 100.00       | 100.00        | 100.00       | 100.00        |
| Unnormalize   |              |               |               |              |               |               |              |              |                |              |              |              |              |              |              |              |              |               |              |               |
| Ni            | 19           | 19            | 20            | 14           | 14            | 16            | 14           | 16           | 13             | 14           | 20           | 20           | 15           | 12           | 13           | 14           | 17           | 19            | 18           | 18            |
| Cr            | 11           | 14            | 13            | 15           | 16            | 49            | 14           | 15           | 15             | 15           | 15           | 15           | 13           | 13           | 16           | 16           | 26           | 16            | 15           | 11            |
| Sc            | 34           | 34            | 34            | 33           | 33            | 40            | 34           | 33           | 34             | 34           | 34           | 33           | 34           | 34           | 33           | 34           | 39           | 35            | 34           | 34            |
| V             | 355          | 345           | 350           | 347          | 341           | 317           | 342          | 344          | 346            | 356          | 345          | 354          | 354          | 348          | 344          | 341          | 343          | 349           | 339          | 345           |
| Ba            | <b>648</b>   | 615           | 637           | 612          | 613           | 709           | <b>637</b>   | <b>623</b>   | 619            | 643          | 634          | 625          | <b>635</b>   | <b>644</b>   | 625          | 630          | 643          | <b>638</b>    | 639          | 624           |
| Rb            | 44           | 42            | 43            | 42           | 39            | 35            | 43           | 40           | 41             | 31           | 41           | 40           | 40           | 43           | 41           | 42           | 33           | 44            | 42           | 42            |
| Sr            | 315          | 308           | 322           | 303          | 303           | 345           | 311          | 298          | 302            | 315          | 303          | 302          | 291          | 301          | 300          | 307          | 337          | 320           | 316          | 311           |
| Zr            | 168          | 162           | 166           | 156          | 154           | 163           | 158          | 154          | 158            | 157          | 157          | 157          | 159          | 162          | 156          | 156          | 158          | 169           | 165          | 167           |
| Y             | 34           | 33            | 34            | 34           | 32            | 45            | 33           | 33           | 31             | 35           | 32           | 32           | 33           | 34           | 33           | 33           | 36           | 34            | 34           | 35            |
| Nb            | 12.4         | 12.4          | 11.9          | 10.4         | 11.5          | 12.5          | 10.3         | 12.0         | 10.3           | 10.0         | 11.3         | 10.9         | 11.7         | 10.5         | 11.8         | 10.1         | 11.0         | 11.6          | 11.0         | 12.1          |
| Ga            | 23           | 20            | 23            | 20           | 19            | 24            | 20           | 21           | 20             | 19           | 21           | 21           | 20           | 22           | 21           | 21           | 20           | 19            | 21           | 22            |
| Cu            | 21           | 20            | 23            | 26           | 24            | 29            | 29           | 29           | 25             | 24           | 26           | 25           | 26           | 29           | 26           | 25           | 28           | 30            | 28           | 31            |
| Zn            | 120          | 116           | 118           | 116          | 111           | 124           | 115          | 117          | 114            | 116          | 115          | 116          | 115          | 116          | 113          | 115          | 112          | 116           | 114          | 119           |
| Pb            | 7            | 7             | 7             | 7            | 7             | 5             | 10           | 9            | 9              | 10           | 8            | 9            | 8            | 10           | 8            | 9            | 5            | 6             | 8            | 8             |
| La            | 22           | 23            | 20            | 21           | 22            | 19            | 22           | 21           | 22             | 26           | 23           | 14           | 20           | 20           | 23           | 21           | 20           | 22            | 23           | 24            |
| Ce            | 51           | 54            | 50            | 45           | 43            | 45            | 46           | 46           | 51             | 44           | 50           | 40           | 44           | 46           | 44           | 49           | 38           | 48            | 48           | 49            |
| Th            | 5            | 5             | 4             | 5            | 4             | 4             | 4            | 5            | 5              | 5            | 5            | 5            | 4            | 4            | 4            | 4            | 1            | 2             | 4            | 4             |
| Nd            | 28           | 27            | 25            | 24           | 26            | 26            | 22           | 24           | 28             | 25           | 28           | 25           | 25           | 27           | 30           | 26           | 25           | 27            | 24           | 24            |
| U             | nd           | nd            | nd            | nd           | nd            | nd            | nd           | nd           | nd             | nd           | nd           | nd           | nd           | nd           | nd           | nd           | nd           | nd            | nd           | nd            |

Table DR1 (c

| M                       |              |              |               |              |              |              |              |               |               |               |               |              |              |               |               |              |              |              |              |              |
|-------------------------|--------------|--------------|---------------|--------------|--------------|--------------|--------------|---------------|---------------|---------------|---------------|--------------|--------------|---------------|---------------|--------------|--------------|--------------|--------------|--------------|
| SN                      | '05121       | '05122       | 05136         | 06008        | 06009        | 06038        | 06047        | 06056         | 06058         | 06059         | 06060         | 06062        | 06064        | 06091         | 06092         | 06100        | 06102        | 06104        | 06106        | 06156        |
| WSU run                 | 0305(2)      | 0305(3)      | 0405(2)       | 0106(3)      | 0106(3)      | 0106(4)      | 0106(4)      | 0306(2)       | 0106(4)       | 0106(4)       | 0106(4)       | 0106(4)      | 0106(4)      | 0206          | 0206          | 0206         | 0306(1)      | 0206         | 0306(1)      | 0306(1)      |
| 7.5' Quad               | Nile         | Nile         | lanastash Lak | Nile         | Nile         | Nile         | Nile         | lanastash Lak | lanastash Lak | lanastash Lak | lanastash Lak | Nile         | Nile         | lanastash Lak | lanastash Lak | Nile         | Nile         | Nile         | Nile         | Nile         |
| UTM N*                  | 5181240      | 5181680      | 5197250       | 5184920      | 5184920      | 5181920      | 5183200      | 5193140       | 5194620       | 5194900       | 5194930       | 5189860      | 5190220      | 5193620       | 5194040       | 5184030      | 5182470      | 5182870      | 5190160      | 5190440      |
| UTM E*                  | 654100       | 654590       | 657860        | 660120       | 660120       | 654710       | 655490       | 653000        | 655170        | 655780        | 655650        | 657020       | 658060       | 654800        | 655100        | 658700       | 655200       | 656400       | 657780       | 656960       |
| Unnormalize             |              |              |               |              |              |              |              |               |               |               |               |              |              |               |               |              |              |              |              |              |
| SiO2                    | 53.13        | 53.93        | 54.08         | 54.46        | 54.59        | 53.66        | 54.11        | 54.43         | 55.22         | 54.04         | 55.08         | 55.40        | 55.14        | 54.67         | 55.03         | 54.51        | 55.20        | 55.33        | 55.03        | 55.07        |
| Al2O3                   | 13.43        | 14.33        | 14.33         | 13.62        | 13.72        | 13.55        | 13.81        | 14.15         | 14.20         | 13.94         | 14.02         | 14.05        | 14.38        | 13.95         | 13.96         | 13.75        | 13.92        | 14.20        | 13.99        | 13.83        |
| TiO2                    | 1.851        | 1.848        | 1.840         | 1.943        | 1.936        | 1.927        | 1.906        | 1.950         | 1.908         | 1.890         | 1.925         | 1.961        | 1.867        | 1.873         | 1.965         | 1.919        | 1.916        | 1.910        | 1.913        | 1.895        |
| FeO                     | 11.49        | 10.17        | 9.97          | 11.51        | 11.41        | 11.22        | 10.92        | 11.59         | 10.17         | 10.58         | 10.11         | 9.87         | 10.01        | 10.95         | 10.99         | 11.50        | 11.49        | 10.71        | 11.00        | 10.84        |
| MnO                     | 0.198        | 0.189        | 0.179         | 0.196        | 0.197        | 0.191        | 0.182        | 0.194         | 0.186         | 0.172         | 0.193         | 0.178        | 0.188        | 0.187         | 0.187         | 0.190        | 0.191        | 0.184        | 0.194        | 0.193        |
| CaO                     | 7.17         | 8.89         | 8.62          | 7.60         | 7.63         | 7.29         | 7.69         | 8.20          | 7.86          | 7.70          | 7.91          | 7.73         | 8.00         | 7.76          | 7.68          | 7.62         | 7.66         | 7.85         | 7.72         | 7.70         |
| MgO                     | 4.07         | 4.03         | 3.96          | 4.11         | 4.03         | 3.81         | 3.85         | 4.16          | 3.86          | 3.87          | 3.51          | 3.66         | 3.76         | 3.80          | 3.68          | 3.92         | 4.09         | 3.72         | 3.97         | 4.12         |
| K2O                     | 1.50         | 1.27         | 1.39          | 1.56         | 1.62         | 1.52         | 1.49         | 1.07          | 1.78          | 1.45          | 1.72          | 1.70         | 1.57         | 1.64          | 1.74          | 1.72         | 1.58         | 1.62         | 1.74         | 1.70         |
| Na2O                    | 3.11         | 2.86         | 2.82          | 3.15         | 3.12         | 3.18         | 3.13         | 2.64          | 3.08          | 3.03          | 3.03          | 3.08         | 3.17         | 3.04          | 3.11          | 3.02         | 3.14         | 3.14         | 3.04         | 2.99         |
| P2O5                    | <u>0.307</u> | <u>0.329</u> | <u>0.324</u>  | <u>0.320</u> | <u>0.341</u> | <u>0.320</u> | <u>0.315</u> | <u>0.276</u>  | <u>0.317</u>  | <u>0.305</u>  | <u>0.317</u>  | <u>0.338</u> | <u>0.328</u> | <u>0.306</u>  | <u>0.328</u>  | <u>0.346</u> | <u>0.316</u> | <u>0.316</u> | <u>0.339</u> | <u>0.305</u> |
| analysis tota           | 96.25        | 97.85        | 97.50         | 98.47        | 98.59        | 96.67        | 97.40        | 98.65         | 98.58         | 96.98         | 97.82         | 97.99        | 98.42        | 98.17         | 98.68         | 98.50        | 99.52        | 98.97        | 98.93        | 98.64        |
| Normalized I            |              |              |               |              |              |              |              |               |               |               |               |              |              |               |               |              |              |              |              |              |
| SiO2                    | 55.20        | 55.11        | 55.46         | 55.31        | 55.37        | 55.51        | 55.55        | 55.18         | 56.01         | 55.72         | 56.31         | 56.54        | 56.03        | 55.69         | 55.77         | 55.34        | 55.47        | 55.90        | 55.63        | 55.83        |
| Al2O3                   | 13.95        | 14.65        | 14.69         | 13.83        | 13.91        | 14.02        | 14.18        | 14.34         | 14.41         | 14.38         | 14.34         | 14.34        | 14.61        | 14.21         | 14.15         | 13.96        | 13.99        | 14.35        | 14.14        | 14.02        |
| TiO2                    | 1.924        | 1.889        | 1.887         | 1.974        | 1.964        | 1.994        | 1.957        | 1.977         | 1.935         | 1.949         | 1.968         | 2.002        | 1.897        | 1.908         | 1.991         | 1.948        | 1.925        | 1.930        | 1.934        | 1.921        |
| FeO*                    | 11.93        | 10.40        | 10.23         | 11.69        | 11.57        | 11.61        | 11.21        | 11.74         | 10.31         | 10.90         | 10.33         | 10.08        | 10.18        | 11.15         | 11.14         | 11.68        | 11.55        | 10.82        | 11.11        | 10.99        |
| MnO                     | 0.205        | 0.193        | 0.183         | 0.199        | 0.200        | 0.197        | 0.187        | 0.197         | 0.189         | 0.177         | 0.198         | 0.182        | 0.191        | 0.190         | 0.189         | 0.192        | 0.192        | 0.186        | 0.196        | 0.196        |
| CaO                     | 7.45         | 9.09         | 8.84          | 7.72         | 7.74         | 7.54         | 7.90         | 8.32          | 7.98          | 7.94          | 8.09          | 7.89         | 8.13         | 7.90          | 7.79          | 7.74         | 7.70         | 7.93         | 7.80         | 7.80         |
| MgO                     | 4.23         | 4.11         | 4.06          | 4.18         | 4.09         | 3.94         | 3.95         | 4.21          | 3.92          | 3.99          | 3.59          | 3.74         | 3.82         | 3.87          | 3.73          | 3.98         | 4.11         | 3.76         | 4.01         | 4.18         |
| K2O                     | 1.56         | 1.30         | 1.42          | 1.58         | 1.64         | 1.57         | 1.53         | 1.08          | 1.81          | 1.50          | 1.76          | 1.74         | 1.60         | 1.67          | 1.76          | 1.75         | 1.59         | 1.64         | 1.76         | 1.72         |
| Na2O                    | 3.23         | 2.92         | 2.90          | 3.20         | 3.16         | 3.29         | 3.22         | 2.67          | 3.12          | 3.12          | 3.10          | 3.14         | 3.22         | 3.10          | 3.15          | 3.07         | 3.16         | 3.17         | 3.07         | 3.03         |
| P2O5                    | <u>0.319</u> | <u>0.34</u>  | <u>0.332</u>  | <u>0.325</u> | <u>0.346</u> | <u>0.331</u> | <u>0.324</u> | <u>0.280</u>  | <u>0.321</u>  | <u>0.315</u>  | <u>0.324</u>  | <u>0.345</u> | <u>0.333</u> | <u>0.312</u>  | <u>0.333</u>  | <u>0.351</u> | <u>0.317</u> | <u>0.319</u> | <u>0.343</u> | <u>0.309</u> |
|                         | 100.00       | 100.00       | 100.00        | 100.00       | 100.00       | 100.00       | 100.00       | 100.00        | 100.00        | 100.00        | 100.00        | 100.00       | 100.00       | 100.00        | 100.00        | 100.00       | 100.00       | 100.00       | 100.00       | 100.00       |
| Unnormalize             |              |              |               |              |              |              |              |               |               |               |               |              |              |               |               |              |              |              |              |              |
| Ni                      | 19           | 23           | 14            | 21           | 21           | 14           | 16           | 9             | 14            | 13            | 17            | 14           | 12           | 22            | 20            | 20           | 16           | 21           | 15           | 16           |
| Cr                      | 16           | 45           | 44            | 14           | 15           | 13           | 16           | 27            | 17            | 15            | 17            | 17           | 18           | 16            | 13            | 33           | 34           | 34           | 34           | 33           |
| Sc                      | 33           | 38           | 38            | 33           | 34           | 33           | 33           | 37            | 35            | 34            | 34            | 33           | 34           | 33            | 33            | 339          | 340          | 346          | 343          | 340          |
| V                       | 343          | 311          | 307           | 355          | 347          | 346          | 348          | 326           | 341           | 348           | 346           | 347          | 346          | 338           | 352           | 622          | 631          | 653          | 637          | 618          |
| Ba                      | <b>606</b>   | <b>528</b>   | <b>535</b>    | 624          | 620          | 621          | 615          | 581           | 637           | 620           | 729           | 653          | 637          | 611           | 645           | 44           | 41           | 41           | 42           | 43           |
| Rb                      | 40           | 28           | 30            | 41           | 42           | 40           | 40           | 28            | 41            | 39            | 44            | 43           | 41           | 43            | 43            | 309          | 323          | 323          | 326          | 322          |
| Sr                      | 306          | 327          | 321           | 308          | 312          | 303          | 319          | 329           | 326           | 322           | 331           | 329          | 332          | 319           | 315           | 162          | 168          | 164          | 168          | 167          |
| Zr                      | 163          | 163          | 159           | 166          | 165          | 166          | 163          | 161           | 164           | 158           | 166           | 169          | 159          | 161           | 167           | 33           | 33           | 36           | 34           | 34           |
| Y                       | 33           | 35           | 41            | 33           | 32           | 32           | 31           | 37            | 31            | 31            | 32            | 32           | 31           | 33            | 35            | 10.8         | 10.3         | 10.7         | 10.7         | 10.7         |
| Nb                      | 10.9         | 10.9         | 11.3          | 11.0         | 10.9         | 11.3         | 11.0         | 10.9          | 10.4          | 10.0          | 9.9           | 10.3         | 10.0         | 10.0          | 10.1          | 21           | 20           | 21           | 20           | 19           |
| Ga                      | 19           | 22           | 20            | 22           | 22           | 21           | 24           | 21            | 21            | 22            | 21            | 22           | 23           | 21            | 22            | 28           | 28           | 29           | 27           | 30           |
| Cu                      | 30           | 34           | 24            | 27           | 30           | 27           | 31           | 26            | 28            | 29            | 30            | 31           | 28           | 29            | 30            | 117          | 119          | 117          | 117          | 117          |
| Zn                      | 112          | 115          | 126           | 120          | 119          | 118          | 120          | 122           | 119           | 118           | 119           | 123          | 117          | 115           | 118           | 9            | 8            | 9            | 8            | 7            |
| Pb                      | 6            | 4            | 5             | 9            | 11           | 9            | 9            | 6             | 10            | 10            | 10            | 9            | 8            | 9             | 9             | 23           | 20           | 25           | 19           | 23           |
| La                      | 21           | 21           | 22            | 22           | 19           | 21           | 18           | 22            | 25            | 22            | 19            | 24           | 19           | 20            | 21            | 48           | 45           | 47           | 43           | 44           |
| Ce                      | 46           | 47           | 45            | 50           | 42           | 51           | 50           | 38            | 44            | 41            | 50            | 47           | 43           | 44            | 48            | 4            | 5            | 3            | 6            | 5            |
| Th                      | 1            | 1            | 2             | 3            | 3            | 5            | 4            | 5             | 5             | 4             | 4             | 5            | 4            | 4             | 5             | 27           | 27           | 27           | 23           | 24           |
| Nd                      | 23           | 27           | 24            | 27           | 25           | 28           | 26           | 28            | 25            | 26            | 29            | 25           | 26           | 25            | 26            | nd           | nd           | nd           | nd           | nd           |
| U                       | 1            | 0            | nd            | nd           | nd           | nd           | nd           | nd            | nd            | nd            | nd            | nd           | nd           | nd            | nd            | nd           | nd           | nd           | nd           | nd           |
| Unnormalized Trace Elen |              |              |               |              |              |              |              |               |               |               |               |              |              |               |               |              |              |              |              |              |

Table DR1 (c

| MEEKS TABL    |              |              |               |              |              |              |              |              |              |              |              |              |              |              |              |              |              |              |              |
|---------------|--------------|--------------|---------------|--------------|--------------|--------------|--------------|--------------|--------------|--------------|--------------|--------------|--------------|--------------|--------------|--------------|--------------|--------------|--------------|
| M             |              |              |               |              |              |              |              |              |              |              |              |              |              |              |              |              |              |              |              |
| SN            | 06167        | 07090        | 08014         | 08038        | 08039        | 08046        | 08047        | 08062        | 08064        | 08069        | 08070        | 09008        | 09012        | 09015        | 09017        | 09021        | 09022        | 09034        | 10053        |
| WSU run       | 0306(1)      | 0307         | 0108(3)       | 0108(2)      | 0108(2)      | 0108(2)      | 0108(2)      | 0108(2)      | 0108(2)      | 0108(2)      | 0108(2)      | 0109         | 0109         | 0109         | 0109         | 0109         | 0109         | 0109         | 0110PHA(3)   |
| 7.5' Quad     | Nile         | Frost Mtn    | /eddehl Canyc | Frost Mtn    | Milk Canyon  | Milk Canyon  | Milk Canyon  | Milk Canyon  | Nile         | Nile         | Tieton Basin | Nile         |
| UTM N*        | 5184350      | 5209420      | 5178400       | 5209240      | 5209220      | 5210220      | 5208510      | 5208760      | 5209360      | 5209320      | 5209080      | 5180490      | 5180830      | 5180810      | 5183350      | 5184920      | 5184940      | 5174100      | 5184920      |
| UTM E*        | 659990       | 656930       | 662260        | 653670       | 653980       | 653600       | 654810       | 658270       | 658000       | 656070       | 656940       | 665700       | 665635       | 665520       | 663300       | 660120       | 660110       | 646060       | 660120       |
| Unnormalize   |              |              |               |              |              |              |              |              |              |              |              |              |              |              |              |              |              |              |              |
| SiO2          | 55.15        | 53.94        | 53.31         | 53.30        | 54.29        | 54.18        | 54.19        | 54.20        | 53.53        | 53.79        | 53.51        | 54.99        | 56.83        | 55.69        | 54.96        | 54.52        | 54.81        | 54.96        | 54.82        |
| Al2O3         | 13.98        | 13.63        | 13.92         | 13.49        | 13.87        | 13.79        | 13.77        | 13.74        | 14.28        | 13.91        | 13.64        | 13.88        | 13.89        | 13.83        | 13.85        | 13.74        | 13.94        | 13.62        | 13.93        |
| TiO2          | 1.949        | 1.935        | 1.917         | 1.920        | 1.880        | 1.895        | 1.884        | 1.895        | 2.000        | 1.879        | 1.874        | 1.957        | 1.919        | 1.909        | 1.970        | 1.958        | 1.913        | 2.042        | 1.946        |
| FeO           | 11.39        | 11.29        | 11.58         | 11.50        | 11.28        | 11.22        | 11.32        | 11.23        | 9.95         | 11.04        | 11.24        | 11.82        | 10.32        | 11.27        | 11.44        | 11.61        | 11.58        | 12.20        | 11.50        |
| MnO           | 0.193        | 0.194        | 0.194         | 0.203        | 0.191        | 0.192        | 0.192        | 0.190        | 0.191        | 0.187        | 0.188        | 0.200        | 0.183        | 0.183        | 0.196        | 0.201        | 0.199        | 0.194        | 0.194        |
| CaO           | 7.69         | 7.52         | 8.47          | 7.29         | 7.65         | 7.60         | 7.69         | 7.64         | 8.85         | 7.77         | 7.58         | 7.64         | 7.16         | 7.18         | 7.63         | 7.60         | 7.80         | 7.45         | 7.65         |
| MgO           | 3.73         | 3.86         | 3.88          | 3.93         | 4.08         | 4.01         | 4.07         | 4.04         | 3.92         | 3.72         | 3.99         | 4.00         | 3.55         | 3.62         | 3.96         | 3.86         | 4.17         | 3.84         | 3.76         |
| K2O           | 1.58         | 1.64         | 1.16          | 1.49         | 1.54         | 1.58         | 1.53         | 1.57         | 1.41         | 1.46         | 1.51         | 1.60         | 1.99         | 1.70         | 1.73         | 1.51         | 1.54         | 1.62         | 1.58         |
| Na2O          | 3.12         | 3.04         | 2.81          | 3.15         | 3.16         | 3.08         | 3.11         | 3.10         | 2.86         | 3.13         | 3.07         | 3.12         | 3.12         | 3.09         | 3.07         | 3.11         | 3.11         | 3.16         | 3.14         |
| P2O5          | <u>0.323</u> | <u>0.318</u> | <u>0.287</u>  | <u>0.314</u> | <u>0.305</u> | <u>0.309</u> | <u>0.302</u> | <u>0.308</u> | <u>0.305</u> | <u>0.309</u> | <u>0.303</u> | <u>0.323</u> | <u>0.305</u> | <u>0.338</u> | <u>0.329</u> | <u>0.327</u> | <u>0.327</u> | <u>0.340</u> | <u>0.336</u> |
| analysis tota | 99.12        | 97.37        | 97.55         | 96.60        | 98.25        | 97.85        | 98.05        | 97.90        | 97.29        | 97.19        | 96.90        | 99.52        | 99.26        | 98.81        | 99.13        | 98.44        | 99.39        | 99.43        | 98.85        |
| Normalized I  |              |              |               |              |              |              |              |              |              |              |              |              |              |              |              |              |              |              |              |
| SiO2          | 55.64        | 55.40        | 54.65         | 55.18        | 55.25        | 55.37        | 55.27        | 55.36        | 55.02        | 55.35        | 55.22        | 55.25        | 57.25        | 56.35        | 55.44        | 55.39        | 55.15        | 55.27        | 55.46        |
| Al2O3         | 14.11        | 14.00        | 14.27         | 13.97        | 14.12        | 14.09        | 14.04        | 14.04        | 14.67        | 14.31        | 14.08        | 13.94        | 13.99        | 14.00        | 13.97        | 13.96        | 14.03        | 13.70        | 14.09        |
| TiO2          | 1.967        | 1.987        | 1.965         | 1.988        | 1.914        | 1.937        | 1.921        | 1.936        | 2.056        | 1.933        | 1.934        | 1.966        | 1.934        | 1.932        | 1.987        | 1.989        | 1.925        | 2.054        | 1.968        |
| FeO*          | 11.50        | 11.59        | 11.88         | 11.90        | 11.48        | 11.46        | 11.54        | 11.47        | 10.23        | 11.36        | 11.60        | 11.87        | 10.39        | 11.41        | 11.54        | 11.80        | 11.65        | 12.27        | 11.64        |
| MnO           | 0.195        | 0.199        | 0.199         | 0.210        | 0.194        | 0.196        | 0.196        | 0.194        | 0.196        | 0.192        | 0.194        | 0.201        | 0.184        | 0.185        | 0.198        | 0.204        | 0.201        | 0.196        | 0.197        |
| CaO           | 7.76         | 7.73         | 8.68          | 7.55         | 7.79         | 7.76         | 7.84         | 7.80         | 9.10         | 7.99         | 7.82         | 7.68         | 7.21         | 7.26         | 7.69         | 7.72         | 7.85         | 7.50         | 7.74         |
| MgO           | 3.76         | 3.96         | 3.98          | 4.07         | 4.16         | 4.10         | 4.15         | 4.12         | 4.03         | 3.83         | 4.12         | 4.02         | 3.58         | 3.66         | 4.00         | 3.92         | 4.19         | 3.86         | 3.80         |
| K2O           | 1.60         | 1.69         | 1.19          | 1.55         | 1.57         | 1.61         | 1.56         | 1.60         | 1.45         | 1.50         | 1.56         | 1.61         | 2.00         | 1.72         | 1.74         | 1.54         | 1.55         | 1.63         | 1.60         |
| Na2O          | 3.15         | 3.12         | 2.88          | 3.27         | 3.21         | 3.15         | 3.18         | 3.16         | 2.94         | 3.22         | 3.17         | 3.14         | 3.15         | 3.13         | 3.10         | 3.16         | 3.13         | 3.17         | 3.15         |
| P2O5          | <u>0.326</u> | <u>0.326</u> | <u>0.294</u>  | <u>0.325</u> | <u>0.310</u> | <u>0.316</u> | <u>0.308</u> | <u>0.315</u> | <u>0.313</u> | <u>0.318</u> | <u>0.313</u> | <u>0.325</u> | <u>0.307</u> | <u>0.342</u> | <u>0.332</u> | <u>0.332</u> | <u>0.329</u> | <u>0.342</u> | <u>0.340</u> |
|               | 100.00       | 100.00       | 100.00        | 100.00       | 100.00       | 100.00       | 100.00       | 100.00       | 100.00       | 100.00       | 100.00       | 100.00       | 100.00       | 100.00       | 100.00       | 100.00       | 100.00       | 100.00       | 100.00       |
| nents (ppm):  |              |              |               |              |              |              |              |              |              |              |              |              |              |              |              |              |              |              |              |
| Unnormalize   | 17           | 12           | 7             | 13           | 15           |              |              |              |              |              |              |              |              |              |              |              |              |              |              |
| Ni            | 12           | 11           | 20            | 12           | 16           | 13           | 13           | 14           | 12           | 16           | 11           | 17           | 12           | 9            | 16           | 17           | 18           | 16           | 17           |
| Cr            | 34           | 34           | 37            | 33           | 33           | 14           | 13           | 14           | 21           | 13           | 14           | 10           | 7            | 5            | 11           | 11           | 18           | 8            | 11           |
| Sc            | 352          | 343          | 335           | 345          | 339          | 32           | 33           | 34           | 39           | 32           | 33           | 34           | 33           | 31           | 33           | 34           | 35           | 34           | 34           |
| V             | 627          | 646          | 509           | 617          | 613          | 340          | 337          | 339          | 348          | 341          | 334          | 347          | 328          | 311          | 349          | 347          | 343          | 360          | 354          |
| Ba            | 42           | 41           | 28            | 39           | 41           | 637          | 613          | 617          | 584          | 652          | 606          | 629          | 699          | 691          | 630          | 630          | 629          | 643          | 742          |
| Rb            | 327          | 317          | 323           | 303          | 320          | 41           | 41           | 44           | 29           | 39           | 41           | 46           | 54           | 51           | 44           | 44           | 43           | 46           | 44           |
| Sr            | 171          | 168          | 158           | 167          | 166          | 316          | 316          | 318          | 333          | 328          | 316          | 324          | 321          | 325          | 322          | 322          | 323          | 314          | 329          |
| Zr            | 35           | 33           | 32            | 33           | 33           | 166          | 166          | 165          | 163          | 164          | 164          | 172          | 188          | 173          | 171          | 170          | 168          | 178          | 176          |
| Y             | 11.3         | 10.2         | 9.7           | 10.3         | 10.3         | 32           | 32           | 32           | 34           | 34           | 32           | 35           | 37           | 34           | 35           | 36           | 35           | 37           | 35           |
| Nb            | 21           | 19           | 20            | 20           | 19           | 10.0         | 9.7          | 10.2         | 10.5         | 9.9          | 10.2         | 12.5         | 12.9         | 12.2         | 12.5         | 11.6         | 12.2         | 13.1         | 12.7         |
| Ga            | 29           | 33           | 28            | 32           | 31           | 20           | 20           | 20           | 22           | 21           | 18           | 20           | 21           | 20           | 20           | 21           | 20           | 21           | 22           |
| Cu            | 118          | 119          | 124           | 124          | 121          | 32           | 34           | 32           | 28           | 32           | 30           | 30           | 17           | 17           | 32           | 32           | 32           | 33           | 33           |
| Zn            | 8            | 8            | 5             | 8            | 8            | 121          | 120          | 121          | 127          | 122          | 119          | 120          | 124          | 119          | 120          | 122          | 121          | 127          | 122          |
| Pb            | 22           | 22           | 22            | 23           | 21           | 7            | 7            | 7            | 6            | 8            | 8            | 6            | 9            | 8            | 8            | 7            | 7            | 8            | 8            |
| La            | 45           | 49           | 45            | 45           | 47           | 25           | 28           | 27           | 24           | 23           | 20           | 21           | 25           | 26           | 23           | 20           | 19           | 23           | 22           |
| Ce            | 5            | 5            | 4             | 4            | 5            | 48           | 47           | 43           | 41           | 46           | 48           | 48           | 54           | 51           | 49           | 47           | 47           | 53           | 49           |
| Th            | 27           | 24           | 23            | 25           | 25           | 4            | 5            | 5            | 4            | 5            | 4            | 5            | 6            | 6            | 5            | 5            | 5            | 6            | 4            |
| Nd            | nd           | 1            | nd            | 2            | 1            | 24           | 24           | 24           | 24           | 24           | 25           | 27           | 28           | 27           | 25           | 23           | 26           | 28           | 26           |
| U             | nd           | nd           | nd            | nd           | nd           | 1            | 2            | 2            | 1            | 2            | 2            | 4            | 2            | 2            | 3            | 2            | 2            | nd           | 3            |

Table DR1 (c

| ME            |              |              | WAPSHILLA RIDGE            |               |              |              |              |              |              |              |              |              |              |              |              |              |              |              |              |
|---------------|--------------|--------------|----------------------------|---------------|--------------|--------------|--------------|--------------|--------------|--------------|--------------|--------------|--------------|--------------|--------------|--------------|--------------|--------------|--------------|
| SN            |              |              | 95068                      | 95075         | 95199        | 99215        | 99216        | 02144        | 03178        | 03184        | 03185        | 04042        | '04068       | '04069       | '04079       | '04185       | '04187       | 04224        | 05112        |
| WSU run       |              |              | 0596                       | 0596          | 0596         | 0300         | 0300         | 0402         | na           | 0404         | 0204         | 0404(1)      | 0504(1)      | 0404(1)      | 0404(1)      | 0504(1)      | 0504(1)      | 0504(2)      | 0405(3)      |
| 7.5' Quad     |              |              | Timberwolf Mt              | Timberwolf Mt | Meeks Table  | Meeks Table  | Meeks Table  | Meeks Table  | anastash Lak | anastash Lak | anastash Lak | Nile         | Nile         | Nile         | Meeks Table  | Nile         | Meeks Table  | anastash Lak | Tieton Basin |
| UTM N*        |              |              | 5184220                    | 5183160       | 5184810      | 5184300      | 5184470      | 5184100      | 5196040      | 5193300      | 5193300      | 5182100      | 5191090      | 5191090      | 5185890      | 5185790      | 5185580      | 5195140      | 5174440      |
| UTM E*        |              |              | 642130                     | 648090        | 646680       | 646730       | 646680       | 647650       | 655040       | 653100       | 653100       | 653680       | 656130       | 656130       | 644060       | 647310       | 647440       | 655030       | 648160       |
| Unnormalize   |              |              |                            |               |              |              |              |              |              |              |              |              |              |              |              |              |              |              |              |
| SiO2          |              |              | 53.88                      | 56.00         | 53.16        | 53.64        | 53.76        | 53.87        | 54.20        | 54.72        | 54.61        | 53.80        | 54.79        | 54.48        | 54.11        | 53.95        | 53.57        | 53.79        | 54.24        |
| Al2O3         |              |              | 13.57                      | 14.51         | 13.42        | 13.51        | 13.44        | 13.55        | 13.57        | 13.91        | 13.72        | 13.69        | 2.237        | 13.78        | 13.78        | 2.183        | 2.221        | 13.49        | 13.66        |
| TiO2          |              |              | 2.158                      | 2.295         | 2.155        | 2.234        | 2.245        | 2.258        | 2.241        | 2.258        | 2.271        | 2.237        | 13.60        | 2.211        | 2.243        | 13.61        | 13.55        | 2.181        | 2.213        |
| FeO           |              |              | 12.39                      | 10.46         | 11.83        | 12.49        | 12.53        | 12.71        | 12.36        | 11.85        | 12.15        | 12.30        | 11.93        | 12.31        | 12.51        | 12.07        | 12.21        | 12.36        | 11.98        |
| MnO           |              |              | 0.194                      | 0.223         | 0.192        | 0.210        | 0.206        | 0.207        | 0.202        | 0.198        | 0.201        | 0.215        | 0.201        | 0.206        | 0.213        | 0.192        | 0.208        | 0.197        | 0.200        |
| CaO           |              |              | 7.59                       | 7.96          | 7.27         | 7.69         | 7.71         | 7.70         | 7.28         | 7.63         | 7.37         | 7.77         | 3.66         | 7.56         | 7.80         | 3.74         | 3.83         | 7.36         | 7.41         |
| MgO           |              |              | 3.86                       | 3.58          | 3.82         | 3.80         | 3.72         | 3.85         | 3.76         | 3.58         | 3.64         | 3.97         | 7.16         | 3.80         | 3.87         | 7.39         | 7.66         | 3.80         | 3.80         |
| K2O           | MEEKS TABLE  |              | 1.62                       | 1.31          | 1.52         | 1.42         | 1.41         | 1.44         | 1.65         | 1.94         | 1.98         | 1.43         | 3.12         | 1.69         | 1.36         | 3.13         | 3.22         | 1.70         | 1.72         |
| Na2O          | 100          |              | 3.37                       | 3.99          | 3.25         | 3.18         | 3.17         | 3.16         | 3.07         | 2.99         | 3.01         | 3.15         | 1.86         | 3.12         | 3.25         | 1.61         | 1.42         | 3.08         | 3.12         |
| P2O5          | average      | std dev      | <u>0.388</u>               | <u>0.444</u>  | <u>0.390</u> | <u>0.433</u> | <u>0.436</u> | <u>0.435</u> | <u>0.399</u> | <u>0.412</u> | <u>0.401</u> | <u>0.424</u> | <u>0.408</u> | <u>0.398</u> | <u>0.430</u> | <u>0.397</u> | <u>0.428</u> | <u>0.390</u> | <u>0.392</u> |
| analysis tota |              |              | 99.02                      | 100.77        | 97.01        | 98.60        | 98.63        | 99.18        | 98.73        | 99.47        | 99.36        | 98.97        | 98.96        | 99.56        | 99.56        | 98.28        | 98.31        | 98.36        | 98.73        |
| Normalized I  |              |              | Normalized Major Element   |               |              |              |              |              |              |              |              |              |              |              |              |              |              |              |              |
| SiO2          | 55.43        | 0.47         | 54.41                      | 55.57         | 54.80        | 54.40        | 54.51        | 54.31        | 54.90        | 55.01        | 54.97        | 54.35        | 55.37        | 54.72        | 54.35        | 54.89        | 54.49        | 54.69        | 54.93        |
| Al2O3         | 14.09        | 0.25         | 13.70                      | 14.40         | 13.83        | 13.70        | 13.63        | 13.66        | 13.74        | 13.98        | 13.81        | 13.83        | 13.74        | 13.84        | 13.84        | 13.85        | 13.78        | 13.72        | 13.83        |
| TiO2          | 1.962        | 0.041        | 2.179                      | 2.277         | 2.221        | 2.266        | 2.276        | 2.277        | 2.270        | 2.270        | 2.286        | 2.260        | 2.261        | 2.221        | 2.253        | 2.221        | 2.259        | 2.218        | 2.241        |
| FeO*          | 11.38        | 0.64         | 12.51                      | 10.38         | 12.19        | 12.66        | 12.70        | 12.82        | 12.52        | 11.91        | 12.23        | 12.43        | 12.05        | 12.36        | 12.57        | 12.28        | 12.42        | 12.57        | 12.13        |
| MnO           | 0.194        | 0.011        | 0.196                      | 0.221         | 0.198        | 0.213        | 0.209        | 0.209        | 0.205        | 0.199        | 0.203        | 0.217        | 0.203        | 0.207        | 0.214        | 0.195        | 0.211        | 0.200        | 0.203        |
| CaO           | 7.91         | 0.44         | 7.67                       | 7.90          | 7.49         | 7.80         | 7.82         | 7.76         | 7.37         | 7.67         | 7.41         | 7.85         | 7.24         | 7.59         | 7.84         | 7.52         | 7.79         | 7.48         | 7.51         |
| MgO           | 4.00         | 0.16         | 3.90                       | 3.55          | 3.94         | 3.85         | 3.77         | 3.88         | 3.81         | 3.60         | 3.66         | 4.01         | 3.70         | 3.82         | 3.88         | 3.81         | 3.90         | 3.86         | 3.85         |
| K2O           | 1.57         | 0.14         | 1.64                       | 1.30          | 1.57         | 1.44         | 1.43         | 1.45         | 1.67         | 1.95         | 1.99         | 1.44         | 1.88         | 1.70         | 1.36         | 1.64         | 1.45         | 1.73         | 1.74         |
| Na2O          | 3.15         | 0.14         | 3.40                       | 3.96          | 3.35         | 3.23         | 3.21         | 3.19         | 3.11         | 3.00         | 3.03         | 3.18         | 3.15         | 3.14         | 3.26         | 3.19         | 3.27         | 3.14         | 3.16         |
| P2O5          | <u>0.326</u> | <u>0.014</u> | <u>0.392</u>               | <u>0.441</u>  | <u>0.402</u> | <u>0.439</u> | <u>0.442</u> | <u>0.439</u> | <u>0.405</u> | <u>0.414</u> | <u>0.404</u> | <u>0.428</u> | <u>0.412</u> | <u>0.400</u> | <u>0.432</u> | <u>0.404</u> | <u>0.435</u> | <u>0.396</u> | <u>0.397</u> |
|               |              |              | 100.00                     | 100.00        | 100.00       | 100.00       | 100.00       | 100.00       | 100.00       | 100.00       | 100.00       | 100.00       | 100.00       | 100.00       | 100.00       | 100.00       | 100.00       | 100.00       | 100.00       |
| Unnormalize   |              |              | Unnormalized Trace Element |               |              |              |              |              |              |              |              |              |              |              |              |              |              |              |              |
| Ni            | 14           | 4            | 9                          | 13            | 7            | 8            | 7            | 12           | 20           | 15           | 12           | 10           | 13           | 20           | 18           | 19           | 11           | 16           | 18           |
| Cr            | 20           | 9            | 17                         | 19            | 19           | 28           | 29           | 30           | 17           | 12           | 6            | 14           | 25           | 13           | 15           | 14           | 17           | 16           | 15           |
| Sc            | 65           | 93           | 35                         | 35            | 33           | 32           | 35           | 33           | 34           | 35           | 32           | 35           | 32           | 34           | 36           | 33           | 35           | 34           | 34           |
| V             | 371          | 84           | 385                        | 385           | 404          | 363          | 358          | 369          | 389          | 409          | 393          | 376          | 352          | 399          | 377          | 397          | 370          | 399          | 401          |
| Ba            | 572          | 181          | 635                        | 748           | 689          | 592          | 581          | 580          | 669          | 691          | 698          | 590          | 675          | 665          | 591          | 658          | 602          | 661          | 663          |
| Rb            | 68           | 84           | 46                         | 36            | 41           | 35           | 32           | 38           | 44           | 50           | 50           | 38           | 47           | 45           | 36           | 41           | 35           | 43           | 44           |
| Sr            | 302          | 47           | 326                        | 357           | 322          | 335          | 326          | 331          | 327          | 341          | 333          | 337          | 317          | 331          | 329          | 316          | 320          | 310          | 326          |
| Zr            | 151          | 40           | 172                        | 166           | 173          | 167          | 166          | 168          | 171          | 182          | 186          | 169          | 181          | 178          | 167          | 170          | 159          | 169          | 182          |
| Y             | 32           | 7            | 35                         | 39            | 37           | 38           | 39           | 39           | 36           | 36           | 37           | 37           | 38           | 35           | 36           | 37           | 37           | 35           | 38           |
| Nb            | 12.5         | 2.8          | 13.6                       | 14.1          | 16.7         | 13.3         | 11.2         | 11.2         | 14.8         | 13.5         | 12.0         | 11.9         | 11.7         | 13.7         | 11.7         | 14.1         | 10.3         | 12.8         | 12.1         |
| Ga            | 22           | 3            | 22                         | 20            | 21           | 22           | 25           | 22           | 21           | 22           | 21           | 21           | 23           | 21           | 21           | 20           | 21           | 20           | 22           |
| Cu            | 37           | 28           | 32                         | 16            | 27           | 19           | 26           | 24           | 32           | 30           | 28           | 12           | 14           | 31           | 10           | 34           | 17           | 35           | 38           |
| Zn            | 107          | 33           | †121                       | †132          | †118         | 126          | 124          | 127          | 121          | 129          | 125          | 130          | 126          | 126          | 129          | 120          | 126          | 123          | 127          |
| Pb            | 9            | 5            | 7                          | 5             | 8            | 6            | 6            | 9            | 8            | 7            | 9            | 6            | 8            | 9            | 6            | 8            | 6            | 7            | 8            |
| La            | 24           | 8            | 38                         | 0             | 44           | 3            | 23           | 21           | 23           | 21           | 28           | 19           | 30           | 24           | 22           | 25           | 21           | 20           | 24           |
| Ce            | 41           | 15           | 0                          | 0             | 55           | 48           | 57           | 53           | 57           | 59           | 55           | 50           | 59           | 46           | 46           | 48           | 48           | 48           | 54           |
| Th            | 7            | 6            | 6                          | 4             | 7            | 5            | 2            | 6            | 5            | 4            | 5            | 4            | 5            | 5            | 3            | 5            | 4            | 5            | 4            |
| Nd            | 24           | 5            | nd                         | nd            | nd           | nd           | nd           | nd           | 32           | 33           | nd           | 29           | 35           | 26           | 26           | 28           | 29           | 30           | 29           |
| U             | 2            | 1            | nd                         | nd            | nd           | nd           | nd           | nd           | nd           | nd           | nd           | nd           | nd           | nd           | nd           | nd           | nd           | nd           | nd           |

Table DR1 (c

| M                                                                                                 |                      |               |               |               |               |                 |             |           |             |           |             |            |         |
|---------------------------------------------------------------------------------------------------|----------------------|---------------|---------------|---------------|---------------|-----------------|-------------|-----------|-------------|-----------|-------------|------------|---------|
| SN                                                                                                | '05120               | 05129         | 05130         | 06094         | 06150         | 07014           | 07015       | 08072     | 09019       | 09073(43) | 10052       | 10058      | 10101   |
| WSU run                                                                                           | 0305(3)              | 0405(2)       | 0405(2)       | 0206          | 0107(2)       | 0107(3)         | 0107(3)     | 0108(2)   | 0109        | 0110(2)   | 0110PHA(3)  | 0110PHA(3) | 0210PHA |
| 7.5' Quad                                                                                         | Weeks Tablelanastash | LaKananastash | LaKananastash | LaKananastash | LaKananastash | Lak Milk Canyon | Milk Canyon | Frost Mtn | Milk Canyon | Nile      | Milk Canyon | Nile       | Nile    |
| UTM N*                                                                                            | 5181320              | 5193790       | 5197040       | 5196120       | 5193300       | 5183620         | 5179970     | 5208840   | 5183770     | 5186700   | 5188140     | 5186560    | 5185600 |
| UTM E*                                                                                            | 650040               | 654820        | 655970        | 655720        | 653100        | 662750          | 666520      | 657220    | 663620      | 658660    | 662990      | 658620     | 659960  |
| Unnormalize                                                                                       |                      |               |               |               |               |                 |             |           |             |           |             |            |         |
| SiO2                                                                                              | 53.96                | 54.16         | 53.77         | 53.96         | 54.33         | 53.74           | 53.98       | 53.07     | 54.40       | 53.58     | 54.14       | 54.38      | 54.71   |
| Al2O3                                                                                             | 13.54                | 13.50         | 13.38         | 13.53         | 13.52         | 13.58           | 13.51       | 13.58     | 13.65       | 13.38     | 13.63       | 13.54      | 13.63   |
| TiO2                                                                                              | 2.175                | 2.258         | 2.231         | 2.266         | 2.274         | 2.195           | 2.239       | 2.192     | 2.244       | 2.225     | 2.197       | 2.262      | 2.307   |
| FeO                                                                                               | 11.87                | 11.70         | 11.88         | 12.09         | 12.04         | 11.86           | 12.14       | 11.94     | 12.11       | 12.27     | 12.31       | 12.18      | 11.87   |
| MnO                                                                                               | 0.201                | 0.202         | 0.201         | 0.214         | 0.207         | 0.199           | 0.199       | 0.198     | 0.199       | 0.192     | 0.197       | 0.198      | 0.182   |
| CaO                                                                                               | 7.48                 | 7.19          | 7.16          | 7.30          | 7.27          | 7.45            | 7.34        | 7.34      | 7.40        | 7.15      | 7.36        | 7.01       | 6.64    |
| MgO                                                                                               | 3.76                 | 3.50          | 3.61          | 3.63          | 3.48          | 3.78            | 3.77        | 3.77      | 3.74        | 3.57      | 3.72        | 3.51       | 3.41    |
| K2O                                                                                               | 1.59                 | 1.92          | 1.82          | 1.72          | 1.76          | 1.74            | 1.81        | 1.55      | 1.82        | 1.76      | 1.85        | 1.73       | 1.73    |
| Na2O                                                                                              | 3.16                 | 3.01          | 3.00          | 3.07          | 3.04          | 3.02            | 2.97        | 3.15      | 3.04        | 3.05      | 3.01        | 3.19       | 3.37    |
| P2O5                                                                                              | 0.390                | 0.398         | 0.384         | 0.397         | 0.405         | 0.389           | 0.389       | 0.389     | 0.395       | 0.390     | 0.393       | 0.422      | 0.435   |
| analysis tota                                                                                     | 98.13                | 97.83         | 97.44         | 98.18         | 98.33         | 97.95           | 98.35       | 97.18     | 99.00       | 97.57     | 98.80       | 98.42      | 98.28   |
| WAPSHILLA RIDGE                                                                                   |                      |               |               |               |               |                 |             |           |             |           |             |            |         |
| 30                                                                                                |                      |               |               |               |               |                 |             |           |             |           |             |            |         |
| average std dev                                                                                   |                      |               |               |               |               |                 |             |           |             |           |             |            |         |
| 98.57 0.78                                                                                        |                      |               |               |               |               |                 |             |           |             |           |             |            |         |
| Normalized ls (Weight %):                                                                         |                      |               |               |               |               |                 |             |           |             |           |             |            |         |
| SiO2                                                                                              | 54.99                | 55.36         | 55.19         | 54.97         | 55.25         | 54.87           | 54.89       | 54.60     | 54.95       | 54.92     | 54.80       | 55.25      | 55.67   |
| Al2O3                                                                                             | 13.80                | 13.80         | 13.73         | 13.79         | 13.75         | 13.86           | 13.74       | 13.97     | 13.79       | 13.71     | 13.80       | 13.76      | 13.87   |
| TiO2                                                                                              | 2.217                | 2.308         | 2.290         | 2.309         | 2.312         | 2.241           | 2.276       | 2.256     | 2.267       | 2.280     | 2.223       | 2.299      | 2.347   |
| FeO*                                                                                              | 12.10                | 11.96         | 12.19         | 12.32         | 12.24         | 12.10           | 12.34       | 12.29     | 12.23       | 12.57     | 12.46       | 12.37      | 12.08   |
| MnO                                                                                               | 0.205                | 0.207         | 0.206         | 0.218         | 0.210         | 0.203           | 0.203       | 0.204     | 0.201       | 0.197     | 0.199       | 0.201      | 0.185   |
| CaO                                                                                               | 7.63                 | 7.35          | 7.35          | 7.43          | 7.39          | 7.61            | 7.46        | 7.55      | 7.48        | 7.32      | 7.44        | 7.12       | 6.75    |
| MgO                                                                                               | 3.83                 | 3.58          | 3.71          | 3.70          | 3.54          | 3.86            | 3.84        | 3.88      | 3.78        | 3.66      | 3.76        | 3.56       | 3.47    |
| K2O                                                                                               | 1.62                 | 1.96          | 1.87          | 1.75          | 1.79          | 1.77            | 1.84        | 1.60      | 1.84        | 1.81      | 1.87        | 1.76       | 1.76    |
| Na2O                                                                                              | 3.22                 | 3.08          | 3.08          | 3.12          | 3.09          | 3.08            | 3.02        | 3.24      | 3.07        | 3.13      | 3.04        | 3.24       | 3.43    |
| P2O5                                                                                              | 0.398                | 0.406         | 0.394         | 0.404         | 0.412         | 0.398           | 0.396       | 0.400     | 0.399       | 0.400     | 0.398       | 0.429      | 0.442   |
| 100.00 100.00 100.00 100.00 100.00 100.00 100.00 100.00 100.00 100.00 100.00 100.00 100.00 100.00 |                      |               |               |               |               |                 |             |           |             |           |             |            |         |
| Unnormalizements (ppm):                                                                           |                      |               |               |               |               |                 |             |           |             |           |             |            |         |
| Ni                                                                                                | 23                   | 19            | 17            | 21            | 14            | 18              | 17          | 13        | 19          | 15        | 18          | 12         | 11      |
| Cr                                                                                                | 17                   | 11            | 11            | 12            | 10            | 12              | 11          | 10        | 9           | 9         | 11          | 17         | 15      |
| Sc                                                                                                | 34                   | 34            | 33            | 33            | 34            | 34              | 33          | 35        | 34          | 32        | 34          | 31         | 32      |
| V                                                                                                 | 399                  | 388           | 384           | 392           | 382           | 393             | 389         | 393       | 397         | 391       | 389         | 350        | 347     |
| Ba                                                                                                | 661                  | 702           | 677           | 705           | 692           | 678             | 662         | 675       | 650         | 668       | 656         | 678        | 691     |
| Rb                                                                                                | 45                   | 51            | 47            | 46            | 47            | 45              | 46          | 42        | 48          | 53        | 49          | 50         | 49      |
| Sr                                                                                                | 332                  | 326           | 325           | 325           | 333           | 333             | 331         | 327       | 338         | 331       | 333         | 324        | 323     |
| Zr                                                                                                | 184                  | 184           | 180           | 181           | 185           | 185             | 184         | 183       | 184         | 188       | 188         | 202        | 203     |
| Y                                                                                                 | 38                   | 38            | 38            | 37            | 37            | 36              | 37          | 34        | 38          | 37        | 38          | 39         | 40      |
| Nb                                                                                                | 12.8                 | 12.7          | 13.7          | 11.6          | 11.7          | 11.5            | 12.6        | 11.2      | 13.9        | 13.5      | 13.3        | 13.8       | 13.1    |
| Ga                                                                                                | 22                   | 21            | 22            | 22            | 21            | 20              | 21          | 20        | 22          | 22        | 21          | 22         | 24      |
| Cu                                                                                                | 41                   | 30            | 30            | 33            | 30            | 38              | 30          | 39        | 35          | 32        | 39          | 18         | 17      |
| Zn                                                                                                | 122                  | 126           | 127           | 129           | 129           | 125             | 127         | 132       | 130         | 130       | 130         | 134        | 137     |
| Pb                                                                                                | 6                    | 9             | 8             | 9             | 6             | 7               | 7           | 8         | 6           | 9         | 9           | 9          | 8       |
| La                                                                                                | 25                   | 27            | 25            | 26            | 29            | 23              | 20          | 28        | 23          | 24        | 25          | 28         | 26      |
| Ce                                                                                                | 55                   | 53            | 54            | 57            | 48            | 56              | 53          | 55        | 52          | 57        | 53          | 59         | 56      |
| Th                                                                                                | 2                    | 4             | 4             | 5             | 7             | 7               | 7           | 6         | 6           | 4         | 5           | 4          | 5       |
| Nd                                                                                                | 30                   | 30            | 30            | 31            | 28            | 33              | 30          | 31        | 30          | 31        | 27          | 31         | 32      |
| U                                                                                                 | 2                    | nd            | nd            | nd            | nd            | nd              | nd          | 1         | 3           | 2         | 2           | 4          | 4       |
